# Supplementary material for: Queensland Family Cohort: a study protocol
Source: PubMed Central journal article supplement — BMJ Open. 2021 Jun 24;11(6):e044463. doi: 10.1136/bmjopen-2020-044463 (PMC8231060; doi:10.1136/bmjopen-2020-044463), 2021-06-24
Supplement: bmjopen-2020-044463.draft_revisions.pdf [file bmjopen-2020-044463.draft_revisions.pdf]

# BMJ Open

BMJ Open is committed to open peer review. As part of this commitment we make the peer review history of every article we publish publicly available.

When an article is published we post the peer reviewers' comments and the authors' responses online. We also post the versions of the paper that were used during peer review. These are the versions that the peer review comments apply to.

The versions of the paper that follow are the versions that were submitted during the peer review process. They are not the versions of record or the final published versions. They should not be cited or distributed as the published version of this manuscript.

BMJ Open is an open access journal and the full, final, typeset and author-corrected version of record of the manuscript is available on our site with no access controls, subscription charges or pay-per-view fees (<http://bmjopen.bmj.com>).

If you have any questions on BMJ Open's open peer review process please email [info.bmjopen@bmj.com](mailto:info.bmjopen@bmj.com)

# BMJ Open

## The Queensland Family Cohort: Study Protocol

|                               |                                                                                                                                                                                                                                                                                                                                                                                                                                                                                                                                                                                                                                                                                                                                                                                                                                                                                                                                                                                                                                                                                                                                                                                                                                                                                                                                                                                                                                                          |
|-------------------------------|----------------------------------------------------------------------------------------------------------------------------------------------------------------------------------------------------------------------------------------------------------------------------------------------------------------------------------------------------------------------------------------------------------------------------------------------------------------------------------------------------------------------------------------------------------------------------------------------------------------------------------------------------------------------------------------------------------------------------------------------------------------------------------------------------------------------------------------------------------------------------------------------------------------------------------------------------------------------------------------------------------------------------------------------------------------------------------------------------------------------------------------------------------------------------------------------------------------------------------------------------------------------------------------------------------------------------------------------------------------------------------------------------------------------------------------------------------|
| Journal:                      | <i>BMJ Open</i>                                                                                                                                                                                                                                                                                                                                                                                                                                                                                                                                                                                                                                                                                                                                                                                                                                                                                                                                                                                                                                                                                                                                                                                                                                                                                                                                                                                                                                          |
| Manuscript ID                 | bmjopen-2020-044463                                                                                                                                                                                                                                                                                                                                                                                                                                                                                                                                                                                                                                                                                                                                                                                                                                                                                                                                                                                                                                                                                                                                                                                                                                                                                                                                                                                                                                      |
| Article Type:                 | Protocol                                                                                                                                                                                                                                                                                                                                                                                                                                                                                                                                                                                                                                                                                                                                                                                                                                                                                                                                                                                                                                                                                                                                                                                                                                                                                                                                                                                                                                                 |
| Date Submitted by the Author: | 16-Sep-2020                                                                                                                                                                                                                                                                                                                                                                                                                                                                                                                                                                                                                                                                                                                                                                                                                                                                                                                                                                                                                                                                                                                                                                                                                                                                                                                                                                                                                                              |
| Complete List of Authors:     | <p>Borg, Danielle; Mater Medical Research Institute; The University of Queensland,<br/> Rae, Kym; Mater Medical Research Institute; The University of Queensland<br/> Fiveash, Corrine; Gallipoli Medical Research Foundation<br/> Schagen, Johanna; Mater Medical Research Institute; The University of Queensland<br/> James-McAlpine, Janelle; Mater Medical Research Institute; The University of Queensland<br/> Friedlander, Frances; Greenslopes Private Hospital<br/> Thurston, Claire; Mater Medical Research Institute; The University of Queensland<br/> Oliveri, Maria; Mater Medical Research Institute; The University of Queensland<br/> Harmey, Theresa; Mater Medical Research Institute; The University of Queensland<br/> Cavanagh , Erika; Queensland University of Technology; Mater Hospital Brisbane<br/> Edwards, Christopher; Queensland University of Technology<br/> Fontanarosa, Davide ; Queensland University of Technology, School of Clinical Sciences; Queensland University of Technology<br/> Perkins, Tony; Griffith University, School of Medical Science<br/> Moritz, Karen; The University of Queensland, ; The University of Queensland Child Health Research Centre<br/> de Zubicaray, Greig; Queensland University of Technology<br/> Kumar, Sailesh; Mater Medical Research Institute, Maternal &amp; Fetal Medicine<br/> Clifton, Vicki; Mater Medical Research Institute; The University of Queensland,</p> |
| Keywords:                     | EPIDEMIOLOGY, Physiology < NATURAL SCIENCE DISCIPLINES, Cell biology < NATURAL SCIENCE DISCIPLINES, OBSTETRICS                                                                                                                                                                                                                                                                                                                                                                                                                                                                                                                                                                                                                                                                                                                                                                                                                                                                                                                                                                                                                                                                                                                                                                                                                                                                                                                                           |
|                               |                                                                                                                                                                                                                                                                                                                                                                                                                                                                                                                                                                                                                                                                                                                                                                                                                                                                                                                                                                                                                                                                                                                                                                                                                                                                                                                                                                                                                                                          |

SCHOLARONE™  
Manuscripts

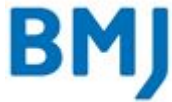

I, the Submitting Author has the right to grant and does grant on behalf of all authors of the Work (as defined in the below author licence), an exclusive licence and/or a non-exclusive licence for contributions from authors who are: i) UK Crown employees; ii) where BMJ has agreed a CC-BY licence shall apply, and/or iii) in accordance with the terms applicable for US Federal Government officers or employees acting as part of their official duties; on a worldwide, perpetual, irrevocable, royalty-free basis to BMJ Publishing Group Ltd ("BMJ") its licensees and where the relevant Journal is co-owned by BMJ to the co-owners of the Journal, to publish the Work in this journal and any other BMJ products and to exploit all rights, as set out in our [licence](#).

The Submitting Author accepts and understands that any supply made under these terms is made by BMJ to the Submitting Author unless you are acting as an employee on behalf of your employer or a postgraduate student of an affiliated institution which is paying any applicable article publishing charge ("APC") for Open Access articles. Where the Submitting Author wishes to make the Work available on an Open Access basis (and intends to pay the relevant APC), the terms of reuse of such Open Access shall be governed by a Creative Commons licence – details of these licences and which [Creative Commons](#) licence will apply to this Work are set out in our licence referred to above.

Other than as permitted in any relevant BMJ Author's Self Archiving Policies, I confirm this Work has not been accepted for publication elsewhere, is not being considered for publication elsewhere and does not duplicate material already published. I confirm all authors consent to publication of this Work and authorise the granting of this licence.

**Title:**

The Queensland Family Cohort: Study Protocol

**Authors:**

Danielle J. Borg<sup>1,2\*</sup>, Kym M. Rae<sup>1,2\*</sup>, Corrine E. Fiveash<sup>3</sup>, Johanna M. Schagen<sup>1,2</sup>, Janelle James-McAlpine<sup>1,2</sup>, Frances Friedlander<sup>4</sup>, Claire Thurston<sup>1,2</sup>, Maria Oliveri<sup>1,2</sup>, Theresa Harmey<sup>1,2</sup>, Erika Cavanagh<sup>5,6,7</sup>, Christopher Edwards<sup>5,6</sup>, Davide Fontanarosa<sup>5,6</sup>, Anthony V. Perkins<sup>8</sup>, Greg du Zubicaray<sup>5,6</sup>, Karen Moritz<sup>2,9</sup>, Sailesh Kumar<sup>1,2</sup>, Vicki Clifton<sup>1,2</sup> on behalf of the Queensland Family Cohort Research Collaborative<sup>10</sup>

**Author Affiliations:**

1. Mater Research Institute, Aubigny Place, South Brisbane, AUSTRALIA
2. University of Queensland, Faculty of Medicine, Brisbane, AUSTRALIA
3. Gallipoli Medical Research Foundation, Greenslopes, AUSTRALIA
4. Maternity Unit, Greenslopes Private Hospital, Greenslopes, AUSTRALIA
5. School of Clinical Sciences, Queensland University of Technology, Brisbane, AUSTRALIA
6. Institute of Health & Biomedical Innovation, Queensland University of Technology, Brisbane, AUSTRALIA
7. Mater Centre for Maternal Fetal Medicine, South Brisbane, AUSTRALIA
8. School of Medical Science, Griffith University, Gold Coast Campus, Gold Coast, AUSTRALIA
9. Child Health Research Centre, Brisbane, AUSTRALIA
10. Queensland Family Cohort Research Collaborative

\* These authors made equal contributions

**Corresponding Author:**

Professor Vicki Clifton

Mater Research Institute

Level 3, Aubigny Place, Raymond Terrace, South Brisbane, 4101, QLD, Australia

T: 0422939723

E: vicki.clifton@mater.uq.edu.au

**Author email addresses and ORCID IDs:**

Danielle J Borg\*                      danielle.borg@mater.uq.edu.au                      0000-0001-6126-7583



1  
2  
3 Kym M. Rae\* kym.rae@mater.uq.edu.au 0000-0002-6016-3464  
4  
5 Corrine Fiveash FiveashC@ramsayhealth.com.au 0000-0002-4700-993X  
6  
7 Johanna M. Schagen j.schagen@uq.edu.au 0000-0001-7889-8402  
8  
9 Janelle James-McAlpine janelle.mcalpine@mater.uq.edu.au 0000-0002-1157-9527  
10  
11 Frances Friedlander franfriedlander@gmail.com 0000-0003-0534-1667  
12  
13 Claire Thurston claire.thurston@mater.uq.edu.au 0000-0002-3239-218X  
14  
15 Maria Oliveri maria.oliveri@outlook.com 0000-0002-7127-5621  
16  
17 Theresa Harmey theresa.harmey@mater.uq.edu.au 0000-0002-7126-3831  
18  
19 Erika Cavanagh ej1.robinson@hdr.qut.edu.au 0000-0002-8596-0080  
20  
21 Christopher Edwards c8.edwards@qut.edu.au 0000-0001-7466-9530  
22  
23 Davide Fontanarosa d3.fontanarosa@qut.edu.au 0000-0001-6986-3718  
24  
25 Anthony Perkins a.perkins@griffith.edu.au 0000-0002-9829-6772  
26  
27 Karen Moritz k.moritz1@uq.edu.au 0000-0002-8085-0034  
28  
29 Greig du Zubicaray greig.dezubicaray@qut.edu.au 0000-0003-4506-0579  
30  
31 Sailesh Kumar sailesh.kumar@mater.uq.edu.au 0000-0002-4892-6748  
32  
33 Vicki Clifton vicki.clifton@mater.uq.edu.au 0000-0003-0832-4811  
34  
35  
36  
37  
38  
39  
40  
41  
42  
43  
44  
45  
46  
47  
48  
49  
50  
51  
52  
53  
54  
55  
56  
57  
58  
59  
60

**Abstract Word count:** 281

**Total Word count (excluding abstract, summary, tables and figures):** 4,814

**Journal:** BMJ Open

**Keywords:** Australia, longitudinal birth cohort, observational study, developmental origins of disease, pregnancy outcomes, family, early childhood outcomes, childhood outcomes, follow-up studies

## Abstract

**Introduction:** The perinatal – postnatal family environment is associated with childhood outcomes including impacts on physical and mental health and educational attainment. Family longitudinal cohort studies collect in depth data that can capture the influence of an era on family lifestyle, mental health, chronic disease, education and financial stability to enable identification of gaps in society and provide the evidence for changes in Government in policy and practice.

**Methods and analysis:** The Queensland Family Cohort (QFC) is a prospective, observational, longitudinal study that will recruit 12,500 pregnant families across the state of Queensland, Australia and intends to follow-up families and children for three decades. To identify the immediate and future health requirements of the QLD population; pregnant participants and their partners will be enrolled by 24 weeks gestation and followed-up at 24, 28 and 36 weeks gestation, during delivery, on-ward, 6 weeks post-partum, and then every 12 months where questionnaires, biological samples and physical measures will be collected from parents and children. To examine the impact of environmental exposures on families, data related to environmental pollution, household pollution and employment exposures will be linked to pregnancy and health outcomes. Where feasible data linkage of State and Federal Government databases will be used to follow the participants long term. Biological samples will be stored long term for future discoveries of biomarkers of health and disease.

**Ethics and dissemination:** Ethical approval has been obtained from the Mater Research Ethics (HREC/16/MHS/113). Findings will be reported to (1) QFC participating families; (2) funding bodies, institutes and hospitals supporting the QFC; (3) federal, state and local governments to inform policy; (4) presented at local, national and international conferences and (5) disseminated by peer-review publications.

**Trial registration:** n/a

## Article Summary

### Strengths and limitations of this study:

#### Strengths

- In-depth data and biological sample collection of physical, social and mental well-being of mother, father/partner, and child at multiple time points
- Survey instruments based on validated tools and routinely collected clinical data
- Recognising the equal importance of the family relationships including same sex relationships on the child so that mothers, fathers or partners are all involved

#### Limitations

- Cultural consultation for individuals who identify as First Nations People is ongoing
- Cost to maintain cohort, infrastructure, storage of data and biobank is high, with lifelong surveillance of families dependent on philanthropic, state and/or federal support

## Background and rationale

The Developmental Origins of Health and Disease (DOHaD) proposes that the intrauterine environment, when impacted by poor maternal nutrition, severe stress or illness, has a detrimental impact on the developing child, both in the short and long term. These prenatal effects can increase the risk of cardiovascular disease, hypertension, obesity, type 2 diabetes, metabolic syndrome and kidney disease [1-3]. However, as the scientific community learns more about how health develops in adulthood, we are also recognising the influences of the paternal environment and the impacts of the intergenerational insults on fetal development [4]. Longitudinal cohort studies that follow participants over time, taking repeated measures, provide compelling data and are powerful research tools to determine associations between a variety of health outcomes and can help drive significant policy change [5].

Although there have been 17 Australian birth cohort studies so far, only 2 have been federally funded; the Longitudinal Study of Australian Children (LSAC) established in 2004 [6], and Footprints in Time: Longitudinal Study of Indigenous Children (LSIC) established in 2008 [7]. While these two cohorts began the innovative approach of linking government administrative data, with basic physical and cognitive information, these children are now aged 15 and 10 years respectively, highlighting a need for more recent data to inform policy. As children were the point of interest for each of these cohorts, important antenatal, postnatal and early life data was not collected from parents, and no biological samples were accrued.

A systematic review of longitudinal birth cohorts in Australia that included measures from one parent and offspring are shown in [Table 1](#). Of these cohorts; almost all were established over 20 years ago, only half of the studies included antenatal measures whilst less than half involved the partner. Of studies that included partners, only 3 studies had biological samples collected from the father. Research involving individuals who identify as First Nations People was minimal and identified only 2 cohorts with specific focus on these groups: the Gudaga cohort in Sydney, New South Wales (NSW) [8] and the Aboriginal Birth Cohort (ABC) in the Northern Territory (NT) [9]. However, since the time of this publication there have been others developed in Australia, including the Gomeroi gaaynggal cohort (NSW) [10], and PANDORA cohort (NT) [11], that are solely focused on the First Nation community.

Of the Australian birth studies, the 2 largest are the Raine Study (Mothers n=2900, Babies n=2868 and Partners n=2804) and the Mater-University of Queensland Study of Pregnancy (MUSP) (Mothers n=7631, Babies n=7223, Partners n=522) with a retention of 82% and 53% at 14 and 21 years respectively [12, 13].

1  
2  
3 The Raine Study was established in Western Australia (WA) in 1989 with a total of 2,900  
4 women birthing in Perth enrolled [14]. Infants from the cohort have been followed for 27 years.  
5 Collection of data began at 18 weeks' gestation of pregnancy and has included diverse survey  
6 topics of participants including, for example; education, toxin exposures, breastfeeding child  
7 behaviour, physical activity, mental health from mothers, fathers, offspring as well as  
8 biological samples from the same. Although, the investigators of this cohort suggest that this  
9 is perhaps the most comprehensive longitudinal study of its kind to date in Australia, there is  
10 no doubt that significant societal change has occurred in the 30 years since it began. As such  
11 intrauterine and paternal influences during conception and pregnancy are likely to be markedly  
12 different.

13  
14 Only 2 of the studies identified in the systematic review by Townsend et al., [15], originated  
15 in Queensland (QLD) - Environments for Healthy Living (EHL) Griffith birth cohort and the  
16 MUSP cohort. The larger of the two (MUSP), was established over 35 years ago and continues  
17 to follow participants with a focus on sociological and psychological outcomes [16]. While its  
18 impacts on QLD health practice and policy have been considerable, since the inception of this  
19 cohort, there have been significant societal changes. The MUSP cohort did not recruit partners,  
20 and only 4.04% (n=273 from 6,527 recruits) were First Nations People with poor retention  
21 rates of this subgroup limiting the capacity of the study to fully appreciate the health needs of  
22 First Nation families during the perinatal period [17]. The QLD population has changed  
23 significantly since 1980 with a dramatic rise in obesity rates now affecting up to 50% of the  
24 population [18], an increase in maternal age at first birth, rising rates of childhood asthma and  
25 allergy [19, 20], a significant change in dietary behaviour [21], a rise in immigration and  
26 communities with a diverse range of health problems.

27  
28 The Environments for Healthy Living (EHL) Griffith birth cohort began in Logan, Gold Coast  
29 and Tweed regions of South-East QLD and Northern New South Wales (NSW) in 2006 [22].  
30 Unlike many other cohorts in Australia, this cohort included an investigation of social,  
31 environmental, neighbourhood and family functioning within its DOHaD-style cohort. Cord  
32 blood was also collected. This cohort was designed in partnership with another research  
33 consortium in Wales, United Kingdom so that the EHL Wales cohort could provide  
34 international comparisons. Data linkages for Medicare Benefits Scheme (MBS),  
35 Pharmaceutical Benefits Scheme (PBS) and the child's immunisation history were obtained  
36 from the Medicare records. Maternal perinatal history was obtained from health records. The  
37 EHL Griffith birth cohort ceased recruitment and follow-up of participants several years ago  
38 when funding for the study ceased.

1  
2  
3 Looking to the future of birth cohorts in QLD, the Mater Hospital in Brisbane is in a strong  
4 position to establish such a cohort particularly given it has the highest birth rate in Queensland  
5 [23] and provides tertiary and quaternary level health services for both high, and low  
6 socioeconomic (SES) populations. Recently, the Queensland Family Cohort (QFC) completed  
7 a pilot feasibility study in Brisbane. The protocol for the QFC study was developed through a  
8 consultation process with QLD health researchers with expertise in DOHaD methodology. This  
9 multi-stage process resulted in a series of 21 research themes for the cohort. Each theme has  
10 its own series of questions and the methodologies to answer these have been developed by a  
11 collaborative group.

12  
13 The particular strengths of this cohort design, are its 1) recruitment from entire state of QLD  
14 (1.85 million km<sup>2</sup>) which has a population of 5.2 million including ~4.3% First Nation  
15 community members; 2) detailed collection of physical, social and mental health data of  
16 mother, father/partner, and child; 3) biological samples collected at multiple time points from  
17 all family members; 4) all survey instruments are based on validated tools and routinely  
18 collected clinical data; 5) inclusion of biological samples were agreed by the research collective  
19 only after detailed justification by individual researchers; 6) recognising the equal importance  
20 of the family relationships on the child so that parents and partners are all involved; 7) inclusive  
21 of same sex relationships and single parents; and 8) inclusion of any participant regardless of  
22 chronic and acute health conditions.

23  
24 The data obtained will enable characterisation of all participants' health and social experiences  
25 for each family unit enrolled in the study to identify the current trends in health and health  
26 behaviours. It will identify immediate and future health requirements of the QLD population  
27 which will have a significant impact on health policy and practice and help define preventative  
28 interventions required for the health of future generations of Australians. Using this rich data  
29 source, we will endeavour to understand the biological mechanisms that may contribute to  
30 adverse health outcomes in parents and their children which will drive future interventions in  
31 health care that include lifestyle, pharmacological and clinical modifications in practice.

## Methods and analysis

### *Study Design and Setting*

The QFC is a prospective, observational, longitudinal study that has been piloted at the Mater Mothers' Hospital (MMH) from 2018-2020 with an aim to continue for three decades. Families will be followed throughout pregnancy, childbirth and infancy via individually funded, separate follow-up studies. Long term follow-up of these participants and their children via data linkage is the aim. Although participant numbers for the pilot study have been attained, the research team continued to recruit into the cohort when COVID-19 pandemic arose in order to further understand implications of COVID-19 on families during the pandemic, albeit with a modified protocol.

Following thorough analysis of the pilot data, additional sites will be added across QLD after 2020, and will be inclusive of metropolitan, rural and remote communities. Additionally, this study will partner with First Nation communities and organisations to modify protocol methods to ensure the inclusion of these community members.

### *Inclusion criteria*

For the pilot phase of the study, pregnant individuals who undertook their antenatal care at the MMH were eligible to participate, however following the pilot project, this will extend into a multisite program across QLD health services. Pregnant individuals who are permanent residents of Australia and reside in QLD, are 12-24 weeks pregnant and their partners, if they have one, were invited to participate in the study. To ensure the cohort is representative of the QLD population, every effort will be made to invite all eligible individuals to participate in the study including those; from non-English speaking backgrounds, under the age of 18 years, with special needs, and First Nation community members. Importantly, this cohort is seeking a true understanding of the breadth of health issues for families, so that participants with any underlying serious or chronic health conditions are also eligible for inclusion in the study.

### *Exclusion criteria*

As this cohort has a significant focus on the health of the family unit, if the pregnant person would like to participate in the cohort, but their partner does not consent, or vice versa, then they will be excluded from the study. If either person is unable to give informed consent, they will be excluded from participating in the study.

### *Recruitment and Consent*

Potential pregnant participants and their partners are approached for participation in the study by suitably qualified experienced research midwives either face-to-face, or via phone.



1  
2  
3 Alternatively, potential families can also contact the study via publicity generated by social  
4 media and marketing campaigns detailing the QFC study. Regardless of the mode used to make  
5 initial contact, those interested in participating are provided with the participant information  
6 statement prior to obtaining written consent.  
7  
8  
9

### 10 *Study Regimen*

11 Active data is collected from pregnant participants and their partners throughout their  
12 pregnancy, delivery and into early infancy, as shown in [Table 2](#). Active data collection will  
13 continue in multiple locations in QLD up to three years gestational age corrected, with lifelong,  
14 passive data collection via MBS and PBS data linkage.  
15  
16

17 During the recent pilot study, data was collected four times during pregnancy (12-24 weeks,  
18 24 weeks, 28 weeks and 36 weeks), at delivery, post-delivery (on the ward), and at 6 weeks  
19 post-partum. [Table 2](#) outlines items collected at each of these occasions that were undertaken  
20 by the participant unaided, while [Table 3](#) highlights the time and those items collected with the  
21 assistance of a research team member. In brief, these were collected as follows: *12-24 weeks* –  
22 consent and enrolment forms completed by pregnant participant and their partner; *24 week* –  
23 is a study visit for pregnant participant and partner for questionnaires, biological sample  
24 collection from both and an ultrasound growth scan; *28 and 36 weeks* – each has a study visit  
25 with questionnaires, biological samples and a ultrasound growth scan collected; *delivery* –  
26 placenta, cord blood sample collection and chart review; *on-ward visit* – chart review,  
27 questionnaire and biological samples collected from mother and baby; *6 weeks post-partum* –  
28 breastfeeding assessment, body composition of infant, questionnaires and biological sample  
29 collection. Consent for data linkage will be sought for participants from the QFC pilot study.  
30 Study data were collected and managed using Research Electronic Data Capture (REDCap)  
31 electronic data capture tools hosted at University of Queensland [24, 25]. REDCap is a secure,  
32 web-based software platform designed to support data capture for research studies providing  
33 1) modifiable user rights to protect identifiable data; 2) an intuitive interface for validated data  
34 capture; 3) audit trails for tracking data manipulation and export procedures; 4) automated  
35 export procedures for seamless data downloads to common statistical packages; and 5)  
36 procedures for data integration and interoperability with external sources [26, 27]. Data  
37 collected was entered into REDCap by a Research Nurse/Midwife, Research Assistant or  
38 another suitably trained member of the research team. Double data entry and cross validation  
39 methods were used to ensure validity and quality of data.  
40  
41  
42  
43  
44  
45  
46  
47  
48  
49  
50  
51  
52  
53  
54  
55  
56  
57  
58  
59  
60



1  
2  
3 The QFC Study has focused on data collection and outcomes from 21 major themes from the  
4 QFC Research Collaborative ([Figure 1](#)), each with their own series of study questions  
5 highlighted in [Supplementary Table 1](#). Data collected across the themes included participant  
6 questionnaires and routinely collected clinical data from medical charts (demographics,  
7 medication usage, medical history, pathology, medical imaging and other clinical results), as  
8 well as intervention data (biological samples, physical and psychological assessments obtained  
9 for research purposes only). Data will be collected by experienced and qualified research  
10 nurses, midwives and research assistants. Some data will be collected by research trained allied  
11 health professionals, including sonographers, dieticians, physiotherapists and psychologists  
12 prospectively from patient notes, observation charts, study specific questionnaires and  
13 assessments, photographs and videos, and electronic laboratory results by research staff and  
14 the principal investigator. Data collection forms will be electronic, except in cases where the  
15 participant does not have reliable access to a computer or the internet, or where a participant  
16 requests the use of paper forms.  
17  
18  
19  
20  
21  
22  
23  
24  
25  
26  
27

### 28 *Primary Outcomes*

29 This cohort has primary outcomes to determine:

- 31 i) current status of parental physical and mental health and its impact on health of  
32 offspring
- 33 ii) explore genetic and biological mechanisms that drive chronic disease risk in  
34 pregnancy, in childhood and in later life and
- 35 iii) understand the influence of the environment and climate change on the health  
36 of future generations.  
37  
38  
39  
40  
41  
42

### 43 *Assessments*

44 The associated measures, assessments and sample collections for the cohort are listed in Tables  
45 [2](#) and [3](#). All questionnaires for the study have been either used in routine clinical care or  
46 previously validated and references are included within the Tables where appropriate.  
47 Secondary outcomes specific to the individual themes are listed in [Supplementary Table 1](#).  
48  
49  
50  
51

### 52 *Sample Size*

53 A sample size of 12,500 QLD families was chosen so that some of the rarer complications of  
54 pregnancy can be interrogated with sufficient statistical power. For example, delivery of small-  
55 for-gestational infants occurs in approximately 6.7% QLD deliveries and a stillbirth delivery  
56 occurs in approximately 0.6% of QLD deliveries, thus warranting a large cohort size [28].  
57  
58  
59  
60

### *Statistical analysis*

Missing outcome data will not be imputed in the primary analysis, as the key assumption of missing at random is not likely to hold in the analysis population. Sensitivity analyses will be conducted, however, using multiple imputations method to explore the potential impact of missing data on outcomes. The characteristics of those participants with missing data will be compared between two treatment groups (healthy vs unhealthy outcomes). Baseline characteristics of babies and their parents will be summarised for each site as well as overall using descriptive statistics. Continuous variables will be reported as numbers of observed and missing values, mean, standard deviation, median and range. Categorical variables will be described as frequencies and percentages.

### **Data Availability Statement**

Data from the QFC Study will be made available in the future for collaborative research questions. Such requests must be authorised by the Principal Investigators, the QFC Research Governance Committee and the appropriate Human Research Ethics Committees and Human Research Governance Safety Entities.

### **Patient and Public Involvement**

The protocol for the pilot study was developed with extensive engagement within the QFC Research Collaborative community and a community engagement group including consumers (individuals aged 18-65). This group highlighted that understanding mental health and social support networks were essential for a vulnerable population such as pregnant women (and their families). Accordingly, both mental and physical wellbeing are strong components within the QFC study design ([Table 2](#)). In addition, the QFC Research Collaborative comprised of research academics and clinicians ([Figure 1](#)), identified the clinical data, biological samples and questionnaires necessary for taking a snapshot of a reproductive age population that would also capture the consumers suggestions raised in the community engagement group.

The QFC team are currently working in partnership with the First Nation communities of QLD to determine how to best to ensure that this protocol is truly inclusive of their community members. At the time of writing, the research team have developed the terms of reference to establish a new consumer panel who are either expecting a baby; have young children or QFC participants, who will further refine the protocol design from their previous experience and preferences, for the future QFC study. The QFC team will ensure that this group includes partners, and First Nation families. QFC Participants were not involved in the recruitment of the study but have provided information in the form of feedback surveys to further refine the

1  
2  
3 study protocol. Lay reports will be made available to interested participants in the form of a  
4 newsletter sent to them via email and via formal invitation to a seminar day where researchers  
5 will describe individual findings.  
6  
7

### 8 9 **Sources of bias**

10 One of the significant sources of bias is related to consent. Under the ethics approval given for  
11 the study, the research team can only approach potential participants to join study if they have  
12 indicated that they are willing to be involved in 'any research that is undertaken by Mater  
13 Health' when they complete their antenatal enrolment forms. If the potential participant leaves  
14 this blank or indicates no, they cannot be contacted. This is likely to mean that those joining  
15 the study are coming from a pool of potential participants that are likely to be better educated  
16 and of higher socio-economic status [29]. Although all potential participants were approached  
17 and followed-up, selection bias may have been introduced for potential participants who were  
18 linguistically diverse and failed to respond to follow-up attempts [30, 31]. Like many other  
19 cohort studies, this protocol relies on the collection of self-reported data from participants. This  
20 is an inherent source of bias in self-collected data [32].  
21  
22  
23  
24  
25  
26  
27  
28  
29

### 30 **Ethics and regulatory aspects**

#### 31 *Ethics*

32 The QFC study has been approved by the Mater Misericordia Limited Human Research Ethics  
33 and Governance Safety Committee (HREC/16/MHS/113).  
34  
35  
36  
37

#### 38 *Participant Safety*

39 All risks to the participants in the study will be mitigated by ensuring all recruitment and data  
40 collection is managed by appropriately trained and experienced research staff which have had  
41 training in empathetic, cross-cultural communication. Recruitment staff will be research nurses  
42 and midwives with extensive experience in research and clinical practice. Data will be stored  
43 in a secure setting and data linkage software will be adequately protected to maintain security  
44 and privacy.  
45  
46  
47  
48  
49

#### 50 *Study Governance*

51 The QFC study is overseen by the principal investigators and the QFC Research Governance  
52 Management Committee. This committee meet every 2 months to: 1) continue to develop the  
53 strategic directions and priorities for the protocol; 2) review all sub-study applications to the  
54 cohort prior to their submission to ethics; and 3) review all unexpected findings from the  
55 analysis under an ethically defensible plan with the QFC Clinical Advisory Panel [33]. Each  
56  
57  
58  
59  
60

1  
2  
3 QFC research theme has a theme leader who report annually and develop the individual  
4 research hypotheses within their theme. New research questions require a sub-study application  
5 that outlines what data requirements the applicant requires for analysis. When approved by the  
6 QFC Research Governance Management Committee, the sub-study application and reference  
7 letter from the QFC Research Governance Committee is attached as supporting documents to  
8 a new Human Research Ethics application, where approval is sought. Most recently, the QFC  
9 Research Governance Management Committee has identified that a community-based  
10 Consumer Advisory Committee would be of benefit to the long-term development of the cohort  
11 as it continues into the future. The terms of reference for this group have been developed and  
12 its establishment is planned for late 2020.  
13  
14  
15  
16  
17  
18  
19

### 20 21 *Unexpected findings during examinations*

22  
23 If analysed data from the study were to reveal findings that bear on the wellbeing of  
24 participants, their relatives or their community, whether anticipated or incidental to the scope  
25 of the research, the QLD Research Governance Committee team are formally notified. The  
26 QLD Research Governance Committee will create a panel of experts to cross-check research  
27 findings for accuracy (QFC Clinical Advisory Panel). Only those confirmed research findings  
28 that are clinically actionable, where there are established therapeutic or preventative  
29 interventions or other available actions, such as lifestyle changes or reproductive decisions, that  
30 have the potential to change the clinical course of the disease or improve the individual's and/or  
31 their genetic relative's quality of life are to be considered to be returnable to the participant.  
32 This panel will, in conjunction with representatives from the QLD Research Governance  
33 Committee, identify and recontact the participant initially via letter, and then by telephone [33].  
34  
35  
36  
37  
38  
39  
40  
41  
42

### 43 *Dissemination*

44 The findings from the analysis of cohort data will be disseminated in a variety of ways  
45 including abstracts, posters and presentations at conferences, and published manuscripts in  
46 peer-reviewed journals. These will also be reported to federal, state and local governments to  
47 inform policy and reports made to funding bodies, institutes and hospitals that participated in  
48 and supported the cohort study. Members of the study team will have publishing and authorship  
49 rights in accordance with NHMRC Australian Code for the Responsible Conduct of Research,  
50 the International Committee of Medical Journal Editors requirements for authorship, and as  
51 described in research agreements.  
52  
53  
54  
55  
56  
57  
58  
59  
60

## Discussion

The QFC is of enormous significance to Australia, particularly to the state of QLD. The only previous longitudinal cohort established in QLD was initiated over 30 years ago [12], and whilst its contributions continue to impact on policy, this cohort sampled only within metropolitan Brisbane and failed to include rural and remote QLD communities. Since its inception, there have been significant societal changes including an increasing burden of chronic disease in adulthood, thus impacting the health outcomes of pregnancy and infancy. Additionally, the impact of other influences such as home environment [34], social determinants of health [35] and the role of fathers [4] on the child are becoming better understood, and the QFC is one of the few Australian cohorts that includes direct sampling of partners. This work will lead to identification of immediate and future health requirements of Australian families, and a solid body of evidence with which to develop well-defined intervention studies to improve health.

The unique outcomes of the QFC will include: 1) deep analysis of maternal and paternal health during antenatal and postpartum periods; 2) examination of perinatal outcomes; 3) life-course analysis of maternal, paternal and infant health outcomes; 4) analysis of biological samples to understand biological mechanisms driving health outcomes; 5) development of rich data that characterises health, social, environmental and educational experiences of family members that can lead to improve understanding of health and disease for all family members during this period. To our knowledge, there is no other cohort within Australia and very few internationally, where all these five points are incorporated into a single study cohort.

The QFC pilot study has so far demonstrated the ability to recruit pregnant participants from private and public sectors, including specialised clinics such as diabetes and refugee clinics. Participating families had individual members born in 53 different countries including Australia, with the maternal age of conception spanning 24 years. Further, our families have identified as single (pregnant participant only), cis-gender and gender diverse. Overall, there has been a 6% withdrawal rate by 6 weeks post-partum. This suggests while still ongoing, the QFC study has the ability to cover the entire range of socioeconomic and cultural groups within the QLD population.

Like many longitudinal cohort studies [15], a significant limitation of the project is the cost of establishing and maintaining a cohort over a number of decades, storing its biological samples and the costs of analysis. To overcome these limitations, the principal investigator has developed this as a multi-institutional initiative that encompasses the entire state, with each institute contributing financially or in-kind towards the cohort (Figure 1). Additionally, the

1  
2  
3 study protocol has not yet completed cultural consultation with the First Nations communities  
4 although it is in process with in-principal agreements from First Nation organisations as the  
5 first outcome achieved. At this point in the study, it is worth noting that the piloted participating  
6 families have been recruited in the metropolitan community of Brisbane and its findings when  
7 reported may not be widely applicable in rural and remote communities. In conclusion, despite  
8 the limitations, analysis of data arising from this cohort will influence policy and practice for  
9 health care that is based on the current health of QLD families, and provide further  
10 understanding of the impact of current health of family members on the health of the next  
11 generation.  
12  
13  
14  
15  
16  
17  
18  
19  
20  
21  
22  
23  
24  
25  
26  
27  
28  
29  
30  
31  
32  
33  
34  
35  
36  
37  
38  
39  
40  
41  
42  
43  
44  
45  
46  
47  
48  
49  
50  
51  
52  
53  
54  
55  
56  
57  
58  
59  
60

For peer review only

**Figure 1:** The QFC Research Collaborative. Each large sphere (navy blue) represents one of the 21 research themes that compromise the QFC research collaborative. Each number represents an individual researcher (149 researchers to date). Each small sphere represents the affiliation of that particular researcher (51 collaborating institutes/universities). These affiliations are as follows:

- ACU (Faculty of Health Sciences); ACU (Institute for Learning Science and Teacher Education); ACU; UQ (Faculty of Health and Behavioural Sciences); Child Health Research Centre; Griffith University; James Cook University (Australian Institute of Tropical Health & Medicine); James Cook University (Department of Medicine); Mater Health; Mater Health Pathology (consultant microbiologist); Mater Health; Princess Alexander Hospital; Mater Health; Queensland Children's Hospital; Mater Research - UQ; Mater Health; Mater Research; Carbal Medical Services; Mater Research -UQ; Menzies Health Institute Queensland, Griffith University (Griffith Health); Metro South Health, QUT (Faculty of Health); Metro South Health; Princess Alexander Hospital; Monash University (Faculty of Medicine, Nursing and Health Sciences); NSW Department of Planning, Industry and Environment; Pathology Queensland; QIMR Berghofer; QUT (Faculty of Health); QUT (Faculty of Health); Child Health Research Centre; QUT (Faculty of Science and Engineering); QUT (Faculty of Science and Engineering); Child Health Research Centre; QUT (Faculty of Health); UQ (Centre of Clinical Research); QUT; University of Georgia; South Australian Health and Medical Research Institute; Sun Yat- Sen University; University of Newcastle; University of Southampton; UQ (Institute for Social Science Research; Faculty of Humanities and Social Sciences); UQ (Centre of Clinical Research); UQ (Diamantina Institute); UQ (Diamantina Institute); Dermatology Research Centre; UQ (Discipline of General Practice; Primary Care Clinical Unit);



1  
 2  
 3  
 4 UQ (Faculty of Business, Economics & Law); UQ (Faculty of Engineering, Architecture & Information Technology); UQ  
 5 (Faculty of Health and Behavioural Sciences); UQ (Faculty of Health and Behavioural Sciences); Bond University (Faculty of Health  
 6 Sciences & Medicine); Mater Health; UQ (Faculty of Medicine); UQ (Faculty of Medicine) Child Health Research Centre; UQ  
 7 (Faculty of Medicine); Centre for Health Services Research; UQ (Faculty of Medicine); Mater Research-UQ; UQ (Faculty of  
 8 Medicine); Perinatal Research Centre; UQ (Faculty of Science); UQ (Centre of Clinical Research); UQ (Institute for Molecular  
 9 Bioscience); UQ (Institute for Social Science Research); UQ (Queensland Brain Institute); Wesley Hospital Monash IVF;  
 10 Wesley Hospital Monash IVF; University of Melbourne.



## Tables

**Table 1:** Longitudinal birth cohorts in Australia where measures from one parent and the child were recorded. (Completed (C), Ongoing (O) and Emerging (E)).

| Decade cohort began | Cohort Name                                                            | Status | Australian State or Territory | References |
|---------------------|------------------------------------------------------------------------|--------|-------------------------------|------------|
| 1970's              | Port Pirie Cohort Study                                                | O      | SA                            | [36]       |
|                     | Adelaide Nutrition Study                                               | C      | SA                            | [37]       |
|                     | Brunswick Family Study                                                 | C      | VIC                           | [38]       |
| 1980's              | Mater- University of QLD Study of Pregnancy                            | O      | QLD                           | [12]       |
|                     | The Raine Study                                                        | O      | WA                            | [14]       |
|                     | Aboriginal Birth Cohort                                                | O      | NT                            | [39]       |
|                     | Adelaide Respiratory Cohort                                            | C      | SA                            | [40]       |
|                     | Nepean Study/ Nepean Kids Growing up Study                             | C      | NSW                           | [40]       |
| 1990's              | Generation One cohort                                                  | O      | SA                            | [41]       |
|                     | Tasmanian Infant Health Study                                          | O      | TAS                           | [42]       |
| 2000's              | Environments for health living Griffith Birth Cohort study             | C      | QLD/ NSW                      | [22]       |
|                     | Peri/Postnatal Epigenetic Study                                        | O      | VIC                           | [43]       |
|                     | Triple B Study: Bumps, Babies and Beyond                               | O      | NSW                           | [44]       |
|                     | Watch Study                                                            | O      | NSW                           | [45]       |
|                     | Gudaga Study                                                           | O      | NSW                           | [46]       |
|                     | Gomerai gaaynggal                                                      | C      | NSW                           | [47]       |
| 2010's              | Splash                                                                 | E      | VIC                           | [48]       |
|                     | VicGen                                                                 | E      | VIC                           | [49]       |
|                     | ORIGINS                                                                | E      | WA                            | [50]       |
|                     | Pregnancy and Neonatal Diabetes Outcomes in Remote Australia (PANDORA) | E      | NT                            | [51]       |

| Timepoint         | Pregnant Participant                                                                                                                                                                                                                                                                                    |                                                                                                                | Partner                                                                                                                                                                                               |                                                                                                | Baby           |                  |
|-------------------|---------------------------------------------------------------------------------------------------------------------------------------------------------------------------------------------------------------------------------------------------------------------------------------------------------|----------------------------------------------------------------------------------------------------------------|-------------------------------------------------------------------------------------------------------------------------------------------------------------------------------------------------------|------------------------------------------------------------------------------------------------|----------------|------------------|
|                   | Questionnaires                                                                                                                                                                                                                                                                                          | Measures/Samples                                                                                               | Questionnaires                                                                                                                                                                                        | Measures/Samples                                                                               | Questionnaires | Measures/Samples |
| Enrolment         | Asthma Control Questionnaire (ACQ)[52]<br>Adult Sleep Pattern Questionnaire (ASPQ)[53-56]<br>Cultural background<br>Feeding your baby[57]<br>Obstetric History<br>Physical Activity[58-62]<br>Residential Housing Questionnaire (RHQ)[63]<br>-nasal Outcome Test (22 items questionnaire) (SNOT-22)[64] | none                                                                                                           | ACQ<br>ASPQ<br>Cultural background<br>Feeding your baby<br>Physical Activity<br>RHQ<br>SNOT-22                                                                                                        | none                                                                                           | none           | none             |
| 24 Week Gestation | ACQ<br>Assessment of Quality of Life Questionnaire (AQoL-6D)[65]<br>ASPQ<br>Bristol Stool Chart[66]<br>Constipation score [67]<br>Couples Satisfaction Index (CSI)[68]<br>Depression Anxiety Stress Scale (DASS-21)[69]<br>DSM-5 Self-Rated Level 1 Cross-Cutting Symptom Measure -                     | Hair Sample<br>Microba Swab<br>Saliva Sample<br>Stool Sample<br>Toenail Sample<br>Urine Sample<br>Vaginal Swab | ACQ<br>AQoL-6D<br>ASPQ<br>Bristol Stool Chart<br>Constipation score<br>CSI<br>DASS-21<br>DSM 5 CCSM<br>EQ-5D-5L<br>Full AES FFQ 2010<br>MSPSS<br>Photograph of Medication<br>Physical Activity<br>RHQ | Hair Sample<br>Microba Swab<br>Saliva Sample<br>Stool Sample<br>Toenail Sample<br>Urine Sample | none           | none             |

1  
2  
3  
4  
5  
6  
7  
8  
9  
10  
11  
12  
13  
14  
15  
16  
17  
18  
19  
20  
21  
22  
23  
24  
25  
26  
27  
28  
29  
30  
31  
32  
33  
34  
35  
36  
37  
38  
39  
40  
41  
42  
43  
44  
45  
46

---

Adult (DSM 5  
CCSM)[70] SNOT-22  
SRRS  
EuroQol 5-dimension  
Questionnaire (EQ-5D-  
5L)[71]  
Full Australian Eating  
Survey Food Frequency  
Questionnaire (AES FFQ  
2010) [72]  
Musculoskeletal  
Function Questionnaire  
(MSK Questions)[73, 74]  
Multidimensional Scale  
of Perceived Social  
Support (MSPSS)[75]  
Photograph of  
Medication  
Physical Activity  
RHQ  
SNOT-22  
Social Readjustment  
Rating Scale (SRRS)[76]

|                   |                                                                                                            |                                                               |      |      |      |      |
|-------------------|------------------------------------------------------------------------------------------------------------|---------------------------------------------------------------|------|------|------|------|
| 28 Week Gestation | ACQ<br>ASPQ<br>Photograph of Medication (if changed from last appointment)<br>Physical Activity<br>SNOT-22 | Microba Swab<br>Saliva Sample<br>Stool Sample<br>Urine Sample | none | none | none | none |
| 36 Week Gestation | ACQ<br>ASPQ<br>Constipation score                                                                          | Saliva Sample<br>Urine Sample<br>Vaginal Swab                 | none | none | none | none |

1  
2  
3  
4  
5  
6  
7  
8  
9  
10  
11  
12  
13  
14  
15  
16  
17  
18  
19  
20  
21  
22  
23  
24  
25  
26  
27  
28  
29  
30  
31  
32  
33  
34  
35  
36  
37  
38  
39  
40  
41  
42  
43  
44  
45  
46

|                     |                                                                                                                                                                                                                                                                                                      |                                                                                                                      |      |      |                                                                |                                                               |
|---------------------|------------------------------------------------------------------------------------------------------------------------------------------------------------------------------------------------------------------------------------------------------------------------------------------------------|----------------------------------------------------------------------------------------------------------------------|------|------|----------------------------------------------------------------|---------------------------------------------------------------|
|                     | Intention to breastfeed questionnaire [57]                                                                                                                                                                                                                                                           |                                                                                                                      |      |      |                                                                |                                                               |
|                     | MSK Questions                                                                                                                                                                                                                                                                                        |                                                                                                                      |      |      |                                                                |                                                               |
|                     | Photograph of Medication (if changed from last appointment)                                                                                                                                                                                                                                          |                                                                                                                      |      |      |                                                                |                                                               |
|                     | Physical Activity                                                                                                                                                                                                                                                                                    |                                                                                                                      |      |      |                                                                |                                                               |
|                     | SNOT-22                                                                                                                                                                                                                                                                                              |                                                                                                                      |      |      |                                                                |                                                               |
| Delivery            | none                                                                                                                                                                                                                                                                                                 | none                                                                                                                 | none | none | none                                                           | none                                                          |
| On-Ward             | Breastfeeding questionnaire [57]                                                                                                                                                                                                                                                                     | Colostrum/Breast Milk Sample                                                                                         | none | none | Skin-to-skin contact<br>Nutrition                              | Meconium Sample<br>Urine Sample                               |
| 6 Weeks Post-partum | ACQ<br>AQoL<br>ASPQ<br>Breastfeeding experience [57]<br>Bristol Stool Chart<br>Constipation score<br>Childcare<br>CSI<br>DASS-21<br>DSM 5 CCSM<br>Edinburgh Postnatal Depression Scale (EPDS)[77]<br>EQ-5D-5L<br>Full AES FFQ 2010<br>MSK Questions<br>MSPSS<br>Photograph of Medication (if changed | Breast Milk Sample<br>Hair Sample<br>Microba Swab<br>Saliva Sample<br>Stool Sample<br>Toenail Sample<br>Urine Sample | none | none | Infant Sleep<br>Diary *<br>Nutrition [57]<br>Infant Medication | Hair Sample<br>Stool Sample<br>Toenail Sample<br>Urine Sample |

1  
2  
3  
4  
5  
6  
7  
8  
9  
10  
11  
12  
13  
14  
15  
16  
17  
18  
19  
20  
21  
22  
23  
24  
25  
26  
27  
28  
29  
30  
31  
32  
33  
34  
35  
36  
37  
38  
39  
40  
41  
42  
43  
44  
45  
46

|                        |
|------------------------|
| from last appointment) |
| Physical Activity      |
| RHQ                    |
| SNOT-22                |
| SRRS                   |

**Table 2** Questionnaires, measures and biological samples completed by participants within the QFC cohort unaided. The appropriate references are included for validated tools. Those without references are tools used routinely in clinical care. \*Collection measures planned for the future.

For peer review only

| Timepoint         | Pregnant Participant                                                                                                                       |                                                                                                                                                                  | Partner                                                                                                                                    |                                                                                                                                                       | Baby              |                                                                                                                                                                         |
|-------------------|--------------------------------------------------------------------------------------------------------------------------------------------|------------------------------------------------------------------------------------------------------------------------------------------------------------------|--------------------------------------------------------------------------------------------------------------------------------------------|-------------------------------------------------------------------------------------------------------------------------------------------------------|-------------------|-------------------------------------------------------------------------------------------------------------------------------------------------------------------------|
|                   | Surveys/Histories                                                                                                                          | Measures/Samples                                                                                                                                                 | Surveys/Histories                                                                                                                          | Measures/Samples                                                                                                                                      | Surveys/Histories | Measures/Samples                                                                                                                                                        |
| Enrolment         | Contact Details<br>Demographics<br>Education History<br>Employment History<br>Family History<br>Malignant melanoma risk<br>Medical History | Bioimpedance<br>Blood Pressure<br>Heart rate<br>Height<br>Skin fold thickness<br>Weight                                                                          | Contact Details<br>Demographics<br>Education History<br>Employment History<br>Family History<br>Malignant melanoma risk<br>Medical History | Height<br>Waist Circumference<br>Weight                                                                                                               | none              | none                                                                                                                                                                    |
| 24 Week Gestation | Alcohol Consumption<br>Medication and Lifestyle Substances<br>Smoking Status                                                               | Blood Sample<br>Breast Skin Swab<br>Cheek Swab<br>Bioimpedance<br>Blood Pressure<br>Heart rate<br>Skin fold thickness<br>Weight<br>Gestational Weight Gain (GWG) | Alcohol Consumption<br>Medication and Lifestyle Substances<br>Smoking Status                                                               | Bioimpedance<br>Blood Pressure<br>Blood Sample<br>Cheek Swab<br>Heart rate<br>Skin fold thickness<br>Skin Swab<br>Waist Circumference<br>Weight<br>WG | none              | Fetal Kidney Scan<br>Fetal Growth Scan<br>Uterine artery Doppler, US for Placental elastography<br>Neonatal Intensive Care Unit (NICU) body measures in preterm infants |
| 28 Week Gestation | Alcohol Consumption<br>Medication and Lifestyle Substances<br>Smoking Status<br>Pregnancy Complications<br>Glucose Tolerance Tests         | Bioimpedance<br>Blood Pressure<br>Blood Sample<br>Heart rate<br>Saliva Sample<br>Skin fold thickness<br>Weight<br>GWG                                            | none                                                                                                                                       | none                                                                                                                                                  | none              | Fetal Kidney Scan<br>Fetal Growth Scan<br>Uterine artery Doppler<br>Placental elastography<br>NICU body measures in preterm infants                                     |
| 36 Week Gestation | Alcohol Consumption                                                                                                                        | Bioimpedance<br>Blood Pressure                                                                                                                                   | none                                                                                                                                       | none                                                                                                                                                  | none              | Fetal Kidney Scan<br>Fetal Growth Scan                                                                                                                                  |

|                     |                                                                                        |                                                                                                   |      |      |  |                                                                                                                                |                                                                                                                                                                                                                                                     |
|---------------------|----------------------------------------------------------------------------------------|---------------------------------------------------------------------------------------------------|------|------|--|--------------------------------------------------------------------------------------------------------------------------------|-----------------------------------------------------------------------------------------------------------------------------------------------------------------------------------------------------------------------------------------------------|
|                     | Medication and Lifestyle Substances<br>Smoking Status                                  | Blood Sample<br>Cheek Swab<br>Heart rate<br>Saliva Sample<br>Skin fold thickness<br>Weight<br>GWG |      |      |  |                                                                                                                                | Uterine artery Doppler<br>Placental elastography<br>NICU body measures in preterm infants                                                                                                                                                           |
| Delivery            | Medication used during labour and delivery<br>Delivery details including complications | none                                                                                              | none | none |  | Medication used during labour and delivery<br>Delivery Details<br>Length of NICU Stay                                          | Abdominal Circumference<br>Weight<br>Cheek Swab<br>Cord Blood or Guthrie cord blood spot<br>Guthrie heel prick<br>Head Circumference<br>Middle Upper Arm Circumference<br>Placenta dimensions, stereology, histology, weight<br>Placenta photograph |
| On-Ward             | Medication prescribed on ward and at discharge,                                        | Blood pressure                                                                                    | none | none |  | Peapod<br>Photograph/Video of baby's mouth, tongue, feeding<br>Anthropometry<br>Medication prescribed on ward and at discharge | Microba Swab<br>Skin Swab                                                                                                                                                                                                                           |
| 6 Weeks Post-partum | Alcohol Consumption                                                                    | Breast Skin Swab<br>Cheek Swab                                                                    | none | none |  | Photographs of rash#                                                                                                           | Abdominal Circumference                                                                                                                                                                                                                             |

1  
2  
3  
4  
5  
6  
7  
8  
9  
10  
11  
12  
13  
14  
15  
16  
17  
18  
19  
20  
21  
22  
23  
24  
25  
26  
27  
28  
29  
30  
31  
32  
33  
34  
35  
36  
37  
38  
39  
40  
41  
42  
43  
44  
45  
46

|                                                       |                                                                                |                                                                                                 |
|-------------------------------------------------------|--------------------------------------------------------------------------------|-------------------------------------------------------------------------------------------------|
| Medication and Lifestyle Substances<br>Smoking Status | Video of feeding<br>Medical Complications<br>(first 6 weeks of life)<br>Peapod | Cheek Swab<br>Head Circumference<br>Microba Swab<br>Middle Upper Arm Circumference<br>Skin Swab |
|-------------------------------------------------------|--------------------------------------------------------------------------------|-------------------------------------------------------------------------------------------------|

**Table 3** Surveys, histories, measures and biological samples completed by participants with the assistance of a research team member.  
#Asthma/Dermatitis related



**Acknowledgements:**

We acknowledge the Yuggera People as the traditional custodians of the land in which the pilot study was conducted. We pay respect to the Elders of this community, past, present and emerging. We would like to acknowledge the families who agreed to participate in pilot stages of this cohort and look forward to their continued involvement as their family grows. We also acknowledge the contributions of the Mater Mother's Hospital, the theatre nurses, midwives in delivery and post-natal wards, Mater Pathology Staff, the placenta collection team who assisted in collection of samples when required. We would like to thank Dr Mike Beckmann and Mater Research Development, Ethics, Governance and Agreements departments for the ongoing support. We thank the staff at Microba for their ongoing collaboration. We would like to acknowledge the researchers and institutes who form the QFC Research Collaborative which helped support the QFC Study. Finally, we thank Dr Aimee Catalan of Catalan Group Ltd Pty for the design and production of Figure 1.

**Authors' contributions:**

DJB and KMR jointly wrote the manuscript, DJB, KMR, SK, VC, designed the QFC protocol, CT, TH, JJM, , FF, MO responsible for recruitment and retention of participants for QFC cohort, DJB, VC, CF, JMS, JJM, CT, MO, TH, designed the Redcap system for QFC data management, EC, CE, DF, SK designed ultrasound data collection, EC, CE collected ultrasound data from QFC participants, DJB, CF, JMS, designed FreezerPro system for management of QFC participants, DJB, KMR, CT, AP, GdZ, KM, SK, VC are members of QFC Governance committee, CF, JMS, JJM, CT, MO, TH, EC, CE, DF, AP, GdZ, KM, SK all reviewed and edited of manuscript on behalf of the Queensland Family Cohort Research Collaborative. All members of the QLD Family Cohort Research Collaboration were involved in establishing the aims and the design of the cohort study.

1  
2  
3 The following are members of the Queensland Family Cohort Research Collaborative and have  
4 all been integral to the overall design of the study: Adam Ewing (Mater Research Institute-  
5 UQ (MRI-UQ)), Alison Carey (QLD University of Technology (QUT)), Amanda Wheeler  
6 (Menzies Institute of Health Griffith University), Ameneh Shahaieian (Australian Catholic  
7 University (ACU)), Andrew P. Hills (MRI-UQ), Andrew Perkins (Monash University), Ann  
8 Peacock (MRI-UQ), Anne Tremellen (MRI-UQ), Annie McArdle (Mater Health), Anthony  
9 Tuckett (University of QLD (UQ)), Asad Ali (UQ), Ash Meakin (MRI-UQ), Barbara  
10 Lingwood (UQ), Barnaby Dixson (UQ), Boyi Yang (Sun Yat-Sen University), Brenda Gannon  
11 (UQ), Carlos Salomon (UQ), Caroline Salom (UQ), Cassandra Pattinson (UQ), Clare Collins  
12 (University of Newcastle (UON)), Claire Wyatt-Smith (ACU), Clare Primiero (UQ), Courtney  
13 Giles (ACU), Cynthia Turner (ACU), Daniel Schweitzer (Mater Health), Danielle Schoenaker  
14 (University of Southampton), David Evans (UQ), David Simmons (UQ), Dilani Mendis  
15 (Griffith University (GU)), Elise Pelzer (QUT), Elizabeth Hurrion (Mater Health), Emma  
16 Hamilton-Williams (UQ), Erin McMeniman (UQ), Frances Maguire (MRI-UQ), Geraint  
17 Rogers (South Australian Health and Medical Research Institute), Greg Monteith (MRI-UQ),  
18 Gregore Iven Mielke (UQ), Guang Hui Dong (Sun Yat-Sen University), Gunther Paul (James  
19 Cook University (JCU)), Helen Barrett (Mater Health), Helen Liley (Mater Health), Helen  
20 Truby (UQ), Honey Heussler (MRI-UQ), Honor Hugo (QUT), Ian Wright (JCU), Jake Gratten  
21 (UQ), Jakob Begun (MRI-UQ), James Cuffe (UQ), James Scott (QLD Institute of Medical  
22 Research- Berghofer (QIMR-B)), Janet Davies (QUT), John Cairney (UQ), John Hooper  
23 (MRI-UQ), John Upham (UQ), Josephine Forbes (MRI-UQ), Julianne McGuire (QUT), Julie  
24 Germain (Mater Health), Julie Hides (GU), Kalina Rossa (UQ), Karen Thorpe (UQ), Kassia  
25 Beetham (ACU), Katie Lee (ACU), Kerry Richard (Pathology QLD), Kristen Gibbons (MRI-  
26 UQ), Kristen Radford (MRI-UQ), Kristin Laurens (QUT), Leisa-Maree Toms (QUT), Lidia  
27 Morawska (QUT), Liisa Laasko (Mater Health), Linda Gallo (UQ), Linda Hickey (MRI-UQ),  
28 Lisa Akison (UQ), Loretta Anderson (Mater Health), Lucia Colodro-Conde (QLD Institute of  
29 Medical Research- Berghofer), Lucy Burr (Mater Health), Luke Knibbs (UQ), Lynne Daniels  
30 (QUT), Magid Fahim (Princess Alexander Hospital, QLD), Mandana Mazerheri (NSW  
31 Department of Planning, Industry and Environment), Maree Knight (MRI-UQ), Mark Green  
32 (Wesley Hospital Monash IVF), Mark Western (UQ), Marloes Dekker (UQ), Megan Rollo  
33 (UON), Melinda Smith (UQ), Meng-Wong Taing (UQ), Micheal Burke (Mater Hospital),  
34 Micheal Kimlin (QUT), Micheal Thomas (Mater Health Pathology), Michele Haynes (ACU),  
35 Mike Beckmann (Mater Health), Natasha Reid (UQ), Nicole Warrington (UQ), Nikky Isbel  
36 (Metro South Health, QLD), Olivia Holland (QUT), Paige Little (QUT), Paul Colditz (UQ),  
37  
38  
39  
40  
41  
42  
43  
44  
45  
46  
47  
48  
49  
50  
51  
52  
53  
54  
55  
56  
57  
58  
59  
60

1  
2  
3 Paul Dawson (MRI-UQ), Paul Gardiner (UQ), Penelope Lind (QIMR-B), Peter D. Sly (UQ),  
4 Peter Soyer (UQ), Rebecca Byrne (QUT), Rebecca Keating (Mater Health), Rick Sturm (UQ),  
5 Sally Schaffer (UQ), Samudragupta Bora (MRI-UQ), Sanmarie Schlebusch (Mater Health),  
6 Sarah Medland (QIMR-B), Sarah Steane (UQ), Shamsad Karatela (UQ), Shelley Wilkinson  
7 (MRI-UQ), Sheridan Guyatt (Mater Health), Simon Bowler (Mater Health), Simon Smith (UQ)  
8 Sophia Yong (UQ), Steve Erceg (Mater Health), Steve McPhail (Metro South Health QLD),  
9 Stewart Trost (UQ), Suresh Sandisivam (Mater Health), Susan de Jersey (UQ), Tara Ross  
10 (Wesley Hospital Monash IVF), Tom Cole-Hunter (QUT), Tony Kenna (QUT), Treasure  
11 McGuire (UQ), Vicki Flenady (MRI-UQ), Wendy Brodribb (UQ), Xiao-Wen Zeng (Sun Yat-  
12 Sen University), Yang Peng (UQ), Yanhe Liu (Wesley Hospital Monash IVF), Yoga  
13 Kandasamy (JCU), Zarqa Said (MRI-UQ) and Zephanie Tyack (UQ).  
14  
15  
16  
17  
18  
19  
20  
21  
22  
23  
24

25 **Funding statement:**

26 This study has received cash and in-kind funding from the following organisations and  
27 institutes: Mater Foundation (NA); University of Queensland (NA); Griffith University (NA);  
28 Queensland University of Technology (NA); Brisbane Diamantina Health Partners (grant no.  
29 1033); The Lott, Golden Casket (grant no. 75002\_GC\_20); Perpetual Impact Funding (grant  
30 no. 2041); Advanced Queensland (grant no. 2441); Qiagen (NA), and Microba (NA).  
31  
32  
33  
34  
35

36 **Competing interest statement:**

37 No competing interests  
38  
39  
40  
41  
42  
43  
44  
45  
46  
47  
48  
49  
50  
51  
52  
53  
54  
55  
56  
57  
58  
59  
60

## References

1. Barker, D., *Developmental origins of adult health and diseases*. J Epidemiol Community Health, 2004. **58**: p. 114-115.
2. Gluckman, P.D., et al., *Effect of in utero and early-life conditions on adult health and disease*. N Engl J Med **359**: p. 61-73.
3. Gluckman, P.D., M.A. Hanson, and C. Pinal, *The developmental origins of adult disease*. Maternal Child Nutrition, 2005. **1**: p. 130-141.
4. Braun, J.M., C. Messerlian, and R. Hauser, *Fathers Matter: Why It's Time to Consider the Impact of Paternal Environmental Exposures on Children's Health*. Curr Epidemiol Rep, 2017. **4**(1): p. 46-55.
5. Western, M., et al., *The case for a new Australian Birth cohort study*, C. Foelz, Editor. 2014, Institute for Social Science Research, University of Queensland,: Brisbane.
6. Gray, M.a.S., *Ann. Growing Up in Australia: The Longitudinal Study of Australian Children*. 2005. 4-9.
7. Thurber, K.A., et al., *Cohort Profile: Footprints in Time, the Australian Longitudinal Study of Indigenous Children*. International Journal of Epidemiology, 2014. **44**(3): p. 789-800.
8. Comino, E., et al., *The Gudaga Study: establishing an Aboriginal birth cohort in an urban community*. Aust N Z J Public Health, 2010. **34 Suppl 1**: p. S9-17.
9. Sayers, S.M., et al., *An Australian Aboriginal birth cohort: a unique resource for a life course study of an Indigenous population. A study protocol*. BMC Int Health Hum Rights, 2003. **3**(1).
10. Ashman, A.M., et al., *A cohort of Indigenous Australian women and their children through pregnancy and beyond: the Gomeri gaaynggal study*. J Dev Orig Health Dis, 2016. **7**(4): p. 357-68.
11. Maple-Brown, L., et al., *Pregnancy And Neonatal Diabetes Outcomes in Remote Australia: the PANDORA study-an observational birth cohort*. Int J Epidemiol, 2019. **48**(1): p. 307-318.
12. Najman, J.M., et al., *Cohort Profile: The Mater-University of Queensland Study of Pregnancy (MUSP)*. Int J Epidemiol, 2005. **34**(5): p. 992-7.
13. Straker, L., et al., *Cohort Profile: The Western Australian Pregnancy Cohort (Raine) Study-Generation 2*. Int J Epidemiol, 2017. **46**(5): p. 1384-1385j.
14. Straker, L., et al., *Cohort Profile: The Western Australian Pregnancy Cohort (Raine) Study-Generation 2* International Journal of Epidemiology, 2017. **46**(5): p. 1384-1385j.
15. Townsend, M.L., et al., *Longitudinal Intergenerational Birth Cohort Designs: A Systematic Review of Australian and New Zealand Studies*. PLoS One, 2016. **11**(3): p. e0150491.
16. Najman, J.M., et al., *Cohort profile update: The Mater-University of Queensland study of pregnancy (MUSP)*. International journal of epidemiology, 2015. **44**(1): p. 78-78f.
17. Najman, J.M., et al., *Cohort Profile Update: The Mater-University of Queensland Study of Pregnancy (MUSP)*. Int J Epidemiol, 2015. **44**(1): p. 78-78f.
18. Leonie K Callaway, A.M.C., H David McIntyre and Johannes B Prins, *The prevalence and impact of overweight and obesity in an Australian obstetric population*. Med J Aust 2006. **184**(2): p. 56-59.
19. Khan, T.K., D.J. Palmer, and S.L. Prescott, *In-utero exposures and the evolving epidemiology of paediatric allergy*. Curr Opin Allergy Clin Immunol, 2015. **15**(5): p. 402-8.
20. Grieger, J.A., et al., *In utero Programming of Allergic Susceptibility*. Int Arch Allergy Immunol, 2016. **169**(2): p. 80-92.

21. Grieger, J.A., L.E. Grzeskowiak, and V.L. Clifton, *Preconception Dietary Patterns in Human Pregnancies Are Associated with Preterm Delivery*. Journal of Nutrition, 2014. **144**(7): p. 1075-1080.
22. Cameron, C., et al., *Environments for Healthy Living (EFHL) Griffith Birth Cohort Study: Background and Methods*. Matern Child Health, 2012. **16**: p. 1896–1905
23. Government, Q., *Births by Hospital*, in *Open Data Portal*. 2019: <https://www.data.qld.gov.au/dataset/births-by-hospital/resource/d3d0feaa-8929-4cb6-9fd7-eb9f40f21bcb>.
24. Harris, P., et al., *Research electronic data capture (REDCap) – A metadata-driven methodology and workflow process for providing translational research informatics support*. J Biomed Inform, 2009. **42**(2): p. 377-81.
25. Harris, P., et al., *The REDCap consortium: Building an international community of software partners*. J Biomed Inform, 2019.
26. Harris, P.A., et al., *The REDCap consortium: Building an international community of software platform partners*. Journal of Biomedical Informatics, 2019. **95**: p. 103208.
27. Harris, P.A., et al., *Research electronic data capture (REDCap)—A metadata-driven methodology and workflow process for providing translational research informatics support*. Journal of Biomedical Informatics, 2009. **42**(2): p. 377-381.
28. Welfare, A.I.o.H.a. *Australia's mothers and babies data visualisations*. 2020; Available from: <https://www.aihw.gov.au/reports/mothers-babies/australias-mothers-babies-data-visualisations/contents/stillbirths-and-neonatal-deaths>.
29. Nohr, E.A. and Z. Liew, *How to investigate and adjust for selection bias in cohort studies*. Acta Obstetrica et Gynecologica Scandinavica, 2018. **97**(4): p. 407-416.
30. Golding, J. and K. Birmingham, *Enrolment and response rates in a longitudinal birth cohort*. Paediatric and Perinatal Epidemiology, 2009. **23**(s1): p. 73-85.
31. Ng, S.-K., R. Scott, and P.A. Scuffham, *Contactable Non-responders Show Different Characteristics Compared to Lost to Follow-Up Participants: Insights from an Australian Longitudinal Birth Cohort Study*. Maternal and Child Health Journal, 2016. **20**(7): p. 1472-1484.
32. Althubaiti, A., *Information bias in health research: definition, pitfalls, and adjustment methods*. Journal of multidisciplinary healthcare, 2016. **9**: p. 211-217.
33. The National Health and Medical Research Council, t.A.R.C.a.U.A., *National Statement on Ethical Conduct in Human Research 2007 (Updated 2018)*. 2018, National Health and Medical Research Council: Commonwealth of Australia, Canberra
34. Ferguson, K.T., et al., *The physical environment and child development: an international review*. International journal of psychology : Journal international de psychologie, 2013. **48**(4): p. 437-468.
35. Wang, E., et al., *Social Determinants of Pregnancy-Related Mortality and Morbidity in the United States: A Systematic Review*. Obstet Gynecol, 2020. **135**(4): p. 896-915.
36. McMichael, A.J., et al., *The Port Pirie cohort study: maternal blood lead and pregnancy outcome*. Journal of Epidemiology & Community Health, 1986. **40**(1): p. 18-25.
37. Magarey, A.M., et al., *Predicting obesity in early adulthood from childhood and parental obesity*. International journal of obesity, 2003. **27**(4): p. 505-513.
38. Carmichael, A., H. Williams, and S. Picot, *Growth patterns, health and illness in preschool children from a multi-ethnic, poor socio-economic status municipality of Melbourne*. Journal of paediatrics and child health, 1990. **26**(3): p. 136-141.
39. Sayers, S.M., D. Mackerras, and G.R. Singh, *Cohort profile: the Australian aboriginal birth cohort (ABC) study*. International journal of epidemiology, 2017. **46**(5): p. 1383-1383f.



40. Douglas, R., et al., *A prospective study of proneness to acute respiratory illness in the first two years of life*. International journal of epidemiology, 1994. **23**(4): p. 818-826.
41. Giles, L., et al., *Growth in early life and the development of obesity by age 9 years: are there critical periods and a role for an early life stressor?* International journal of obesity, 2013. **37**(4): p. 513-519.
42. Trevillian, L.F., et al., *Infant sleeping environment and asthma at 7 years: a prospective cohort study*. American journal of public health, 2005. **95**(12): p. 2238-2245.
43. Loke, Y.J., et al., *The peri/postnatal epigenetic twins study (PETS)*. Twin Research and Human Genetics, 2013. **16**(1): p. 13-20.
44. Hutchinson, D., et al., *Cohort Profile: The Triple B Pregnancy Cohort Study: A longitudinal study of the relationship between alcohol, tobacco and other substance use during pregnancy and the health and well-being of Australian children and families*. International journal of epidemiology, 2018. **47**(1): p. 26-27m.
45. Hure, A.J., et al., *Protocol for the Women And Their Children's Health (WATCH) study: a cohort of pregnancy and beyond*. Journal of epidemiology, 2012. **22**(3): p. 267-275.
46. Comino, E., et al., *The Gudaga Study: establishing an Aboriginal birth cohort in an urban community*. Australian and New Zealand Journal of Public Health, 2010. **34**: p. S9-S17.
47. Ashman, A., et al., *A cohort of Indigenous Australian women and their children through pregnancy and beyond: the Gomerói gaaynggal study*. Journal of Developmental Origins of Health and Disease, 2016. **7**(4): p. 357-368.
48. de Silva-Sanigorski, A.M., et al., *Splash!: a prospective birth cohort study of the impact of environmental, social and family-level influences on child oral health and obesity related risk factors and outcomes*. BMC Public Health, 2011. **11**(1): p. 505.
49. Johnson, S., et al., *Cohort Profile: the VicGeneration (VicGen) study: an Australian oral health birth cohort*. International journal of epidemiology, 2017. **46**(1): p. 29-30.
50. Hagemann, E., et al., *The ORIGINS Project*, in *Pre-emptive Medicine: Public Health Aspects of Developmental Origins of Health and Disease*. 2019, Springer. p. 99-116.
51. Maple-Brown, L., et al., *Pregnancy And Neonatal Diabetes Outcomes in Remote Australia: the PANDORA study—an observational birth cohort*. International journal of epidemiology, 2019. **48**(1): p. 307-318.
52. Juniper, E.F., et al., *Development and validation of a questionnaire to measure asthma control*. Eur Respir J, 1999. **14**(4): p. 902-7.
53. Cella, D., et al., *PROMIS® Adult Health Profiles: Efficient Short-Form Measures of Seven Health Domains*. Value in Health, 2019. **22**(5): p. 537-544.
54. Monk, T.H., et al., *Measuring Sleep Habits Without Using a Diary: The Sleep Timing Questionnaire*. Sleep, 2003. **26**(2): p. 208-212.
55. Morin, C.M., et al., *The Insomnia Severity Index: psychometric indicators to detect insomnia cases and evaluate treatment response*. Sleep, 2011. **34**(5): p. 601-608.
56. Roenneberg, T., M. Wirz-Justice A Fau - Mellow, and M. Mellow, *Life between clocks: daily temporal patterns of human chronotypes*. Journal of biological rhythms, 2003. **18**(0748-7304 (Print)): p. 80-90.
57. Adhikari, P. and M. Cooper-Stanbury. *Australian National Infant Feeding Survey, 2010*. 2018; Available from: <http://dx.doi.org/10.26193/LD6OFT>.
58. Brown, W.J., et al., *Reliability and validity of a modified self-administered version of the Active Australia physical activity survey in a sample of mid-age women*. Australian and New Zealand Journal of Public Health, 2008. **32**(6): p. 535-541.
59. Craig, C.L., et al., *International physical activity questionnaire: 12-country reliability and validity*. Med Sci Sports Exerc, 2003. **35**(8): p. 1381-95.

60. Rosenberg, D.E., et al., *Assessment of sedentary behavior with the International Physical Activity Questionnaire*. J Phys Act Health, 2008. **5**: p. S30-S44.
61. Statistics, A.B.o., *National Health Survey Questionnaire*. 2018.
62. Wendy, J.B. and P. Toby, *Physical Activity in Mid-Age and Older Women: Lessons from the Australian Longitudinal Study on Women's Health*. Kinesiology Review, 2016. **5**(1): p. 87-97.
63. He, C., et al., *The impact of flood and post-flood cleaning on airborne microbiological and particle contamination in residential houses*. Environment International, 2014. **69**: p. 9-17.
64. Hopkins, C., et al., *Psychometric validity of the 22-item Sinonasal Outcome Test*. Clinical Otolaryngology, 2009. **34**(5): p. 447-454.
65. Richardson, J.R.J., et al., *Construction of the descriptive system for the assessment of quality of life AQoL-6D utility instrument*. Health and Quality of Life Outcomes, 2012. **10**(1): p. 38.
66. O'Donnell, L.J., J. Virjee, and K.W. Heaton, *Detection of pseudodiarrhoea by simple clinical assessment of intestinal transit rate*. BMJ (Clinical research ed.), 1990. **300**(6722): p. 439-440.
67. Agachan, F., et al., *A constipation scoring system to simplify evaluation and management of constipated patients*. Dis Colon Rectum, 1996. **39**(6): p. 681-5.
68. Funk, J.L. and R.D. Rogge, *Testing the ruler with item response theory: increasing precision of measurement for relationship satisfaction with the Couples Satisfaction Index*. J Fam Psychol, 2007. **21**(4): p. 572-83.
69. Lovibond, P.F. and S.H. Lovibond, *The structure of negative emotional states: comparison of the Depression Anxiety Stress Scales (DASS) with the Beck Depression and Anxiety Inventories*. Behav Res Ther, 1995. **33**(3): p. 335-43.
70. Clarke, D.E. and E.A. Kuhl, *DSM-5 cross-cutting symptom measures: a step towards the future of psychiatric care?* World psychiatry : official journal of the World Psychiatric Association (WPA), 2014. **13**(3): p. 314-316.
71. Herdman, M., et al., *Development and preliminary testing of the new five-level version of EQ-5D (EQ-5D-5L)*. Qual Life Res., 2011(1573-2649 (Electronic)).
72. Collins, C.E., et al., *Reproducibility and comparative validity of a food frequency questionnaire for Australian adults*. Clin Nutr, 2014. **33**(1532-1983 (Electronic)): p. 906-14.
73. Baessler, K., et al., *Australian pelvic floor questionnaire: a validated interviewer-administered pelvic floor questionnaire for routine clinic and research*. International Urogynecology Journal, 2009. **20**(2): p. 149-158.
74. Bennett, P.J., et al., *Development and validation of a questionnaire designed to measure foot-health status*. Journal of the American Podiatric Medical Association, 1998. **88**(9): p. 419-428.
75. Bruwer, B., et al., *Psychometric properties of the Multidimensional Scale of Perceived Social Support in youth*. Comprehensive Psychiatry, 2008. **49**(2): p. 195-201.
76. Holmes, T.H. and R.H. Rahe, *The Social Readjustment Rating Scale*. J Psychosom Res, 1967. **11**(2): p. 213-8.
77. Cox, J.L., J.M. Holden, and R. Sagovsky, *Detection of postnatal depression. Development of the 10-item Edinburgh Postnatal Depression Scale*. Br J Psychiatry, 1987. **150**: p. 782-6.



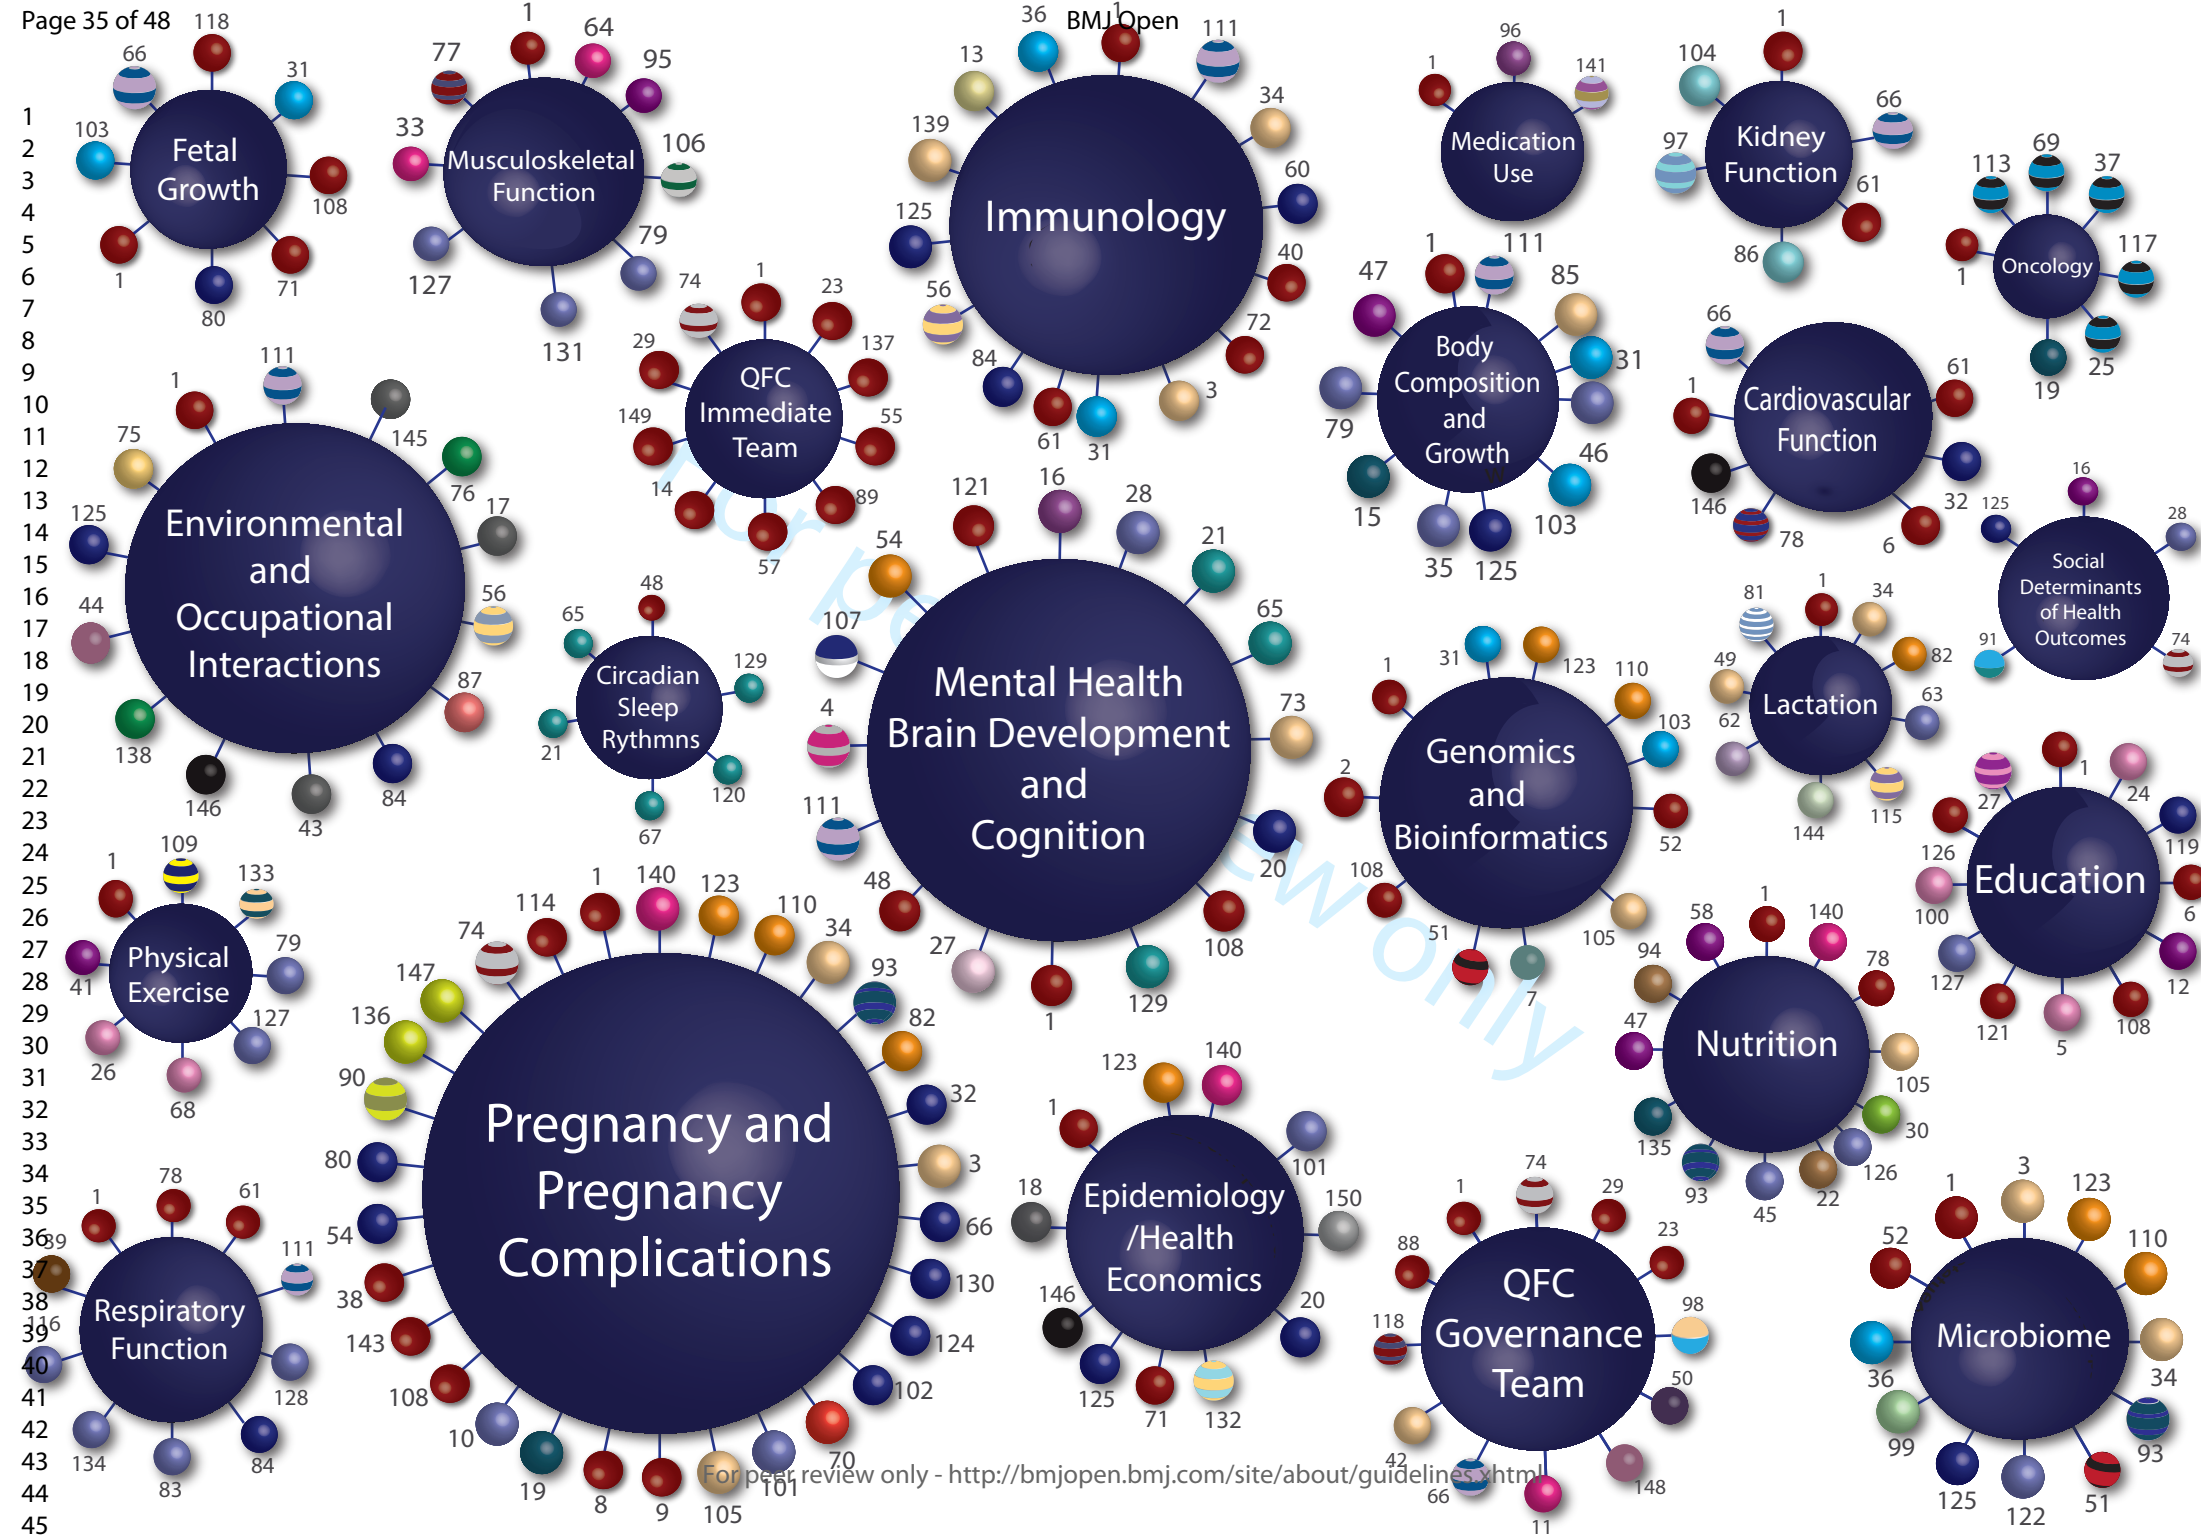

|    |                         |                                                                                                                                                                                                                                                                                                                                                                                                                                                                                                                         | Histories/Surveys/Questionnaires                                                                                                                                                                                                                                                                                                                                                 | Measures/Biological Samples                                                                                                                                                                                                                                                                                                                                                                                                 |                                                                                                                                                                                                                                                                                                                         |      |                                                                                                                                                                                                 |                                                                                                                       |
|----|-------------------------|-------------------------------------------------------------------------------------------------------------------------------------------------------------------------------------------------------------------------------------------------------------------------------------------------------------------------------------------------------------------------------------------------------------------------------------------------------------------------------------------------------------------------|----------------------------------------------------------------------------------------------------------------------------------------------------------------------------------------------------------------------------------------------------------------------------------------------------------------------------------------------------------------------------------|-----------------------------------------------------------------------------------------------------------------------------------------------------------------------------------------------------------------------------------------------------------------------------------------------------------------------------------------------------------------------------------------------------------------------------|-------------------------------------------------------------------------------------------------------------------------------------------------------------------------------------------------------------------------------------------------------------------------------------------------------------------------|------|-------------------------------------------------------------------------------------------------------------------------------------------------------------------------------------------------|-----------------------------------------------------------------------------------------------------------------------|
| 1  | Cardiovascular function | <input type="checkbox"/> Characterisation of the cardiovascular systems of our reproductive population and its relationship to fetal growth and child cardiovascular function<br><input type="checkbox"/> The relationship between maternal cardiovascular system and placental circulation and fetal cardiac output (fetal distress, tachycardia, congenital heart defects)<br><input type="checkbox"/> The relationship between maternal cardiovascular system and placental circulation and fetal kidney development | <input type="checkbox"/> Delivery Details<br><input type="checkbox"/> Demographics<br><input type="checkbox"/> Family History<br><input type="checkbox"/> Medical History<br><input type="checkbox"/> Medication and Lifestyle<br><input type="checkbox"/> Medication chart review for medication during labour and delivery<br><input type="checkbox"/> Pregnancy Complications | <input type="checkbox"/> Blood pressure<br><input type="checkbox"/> Cord blood<br><input type="checkbox"/> Heart rate<br><input type="checkbox"/> Height<br><input type="checkbox"/> Placenta and Placenta Measures<br><input type="checkbox"/> Skinfold thickness<br><input type="checkbox"/> Ultrasound data<br><input type="checkbox"/> Urine<br><input type="checkbox"/> Weight, BMI<br><input type="checkbox"/> PeaPod | <input type="checkbox"/> Fetal Growth<br><input type="checkbox"/> Kidney Function<br><input type="checkbox"/> Medication Usage<br><input type="checkbox"/> Neonatal/Child Body Composition and Growth<br><input type="checkbox"/> Pregnancy and Pregnancy and Complications                                             |      |                                                                                                                                                                                                 |                                                                                                                       |
| 2  |                         |                                                                                                                                                                                                                                                                                                                                                                                                                                                                                                                         | 18                                                                                                                                                                                                                                                                                                                                                                               | Education                                                                                                                                                                                                                                                                                                                                                                                                                   | <input type="checkbox"/> Childcare<br><input type="checkbox"/> Department of Education* and NAPLAN data linkage*<br><input type="checkbox"/> Education history<br><input type="checkbox"/> Pregnancy Complications<br><input type="checkbox"/> Reading for Enjoyment<br><input type="checkbox"/> Reading for Occupation | none | <input type="checkbox"/> Epidemiology and Health Economics<br><input type="checkbox"/> Pregnancy and Pregnancy Complications<br><input type="checkbox"/> Social Determinants of Health Outcomes |                                                                                                                       |
| 3  |                         |                                                                                                                                                                                                                                                                                                                                                                                                                                                                                                                         | 19                                                                                                                                                                                                                                                                                                                                                                               |                                                                                                                                                                                                                                                                                                                                                                                                                             |                                                                                                                                                                                                                                                                                                                         |      |                                                                                                                                                                                                 | <input type="checkbox"/> What are the educational achievements of the parents and attitudes to linguistics?           |
| 4  |                         |                                                                                                                                                                                                                                                                                                                                                                                                                                                                                                                         | 20                                                                                                                                                                                                                                                                                                                                                                               |                                                                                                                                                                                                                                                                                                                                                                                                                             |                                                                                                                                                                                                                                                                                                                         |      |                                                                                                                                                                                                 | <input type="checkbox"/> How does maternal-baby interaction influence early oracy?                                    |
| 5  |                         |                                                                                                                                                                                                                                                                                                                                                                                                                                                                                                                         | 21                                                                                                                                                                                                                                                                                                                                                                               |                                                                                                                                                                                                                                                                                                                                                                                                                             |                                                                                                                                                                                                                                                                                                                         |      |                                                                                                                                                                                                 | <input type="checkbox"/> What is the impact of the parents' social and family networks on child literacy?             |
| 6  |                         |                                                                                                                                                                                                                                                                                                                                                                                                                                                                                                                         | 22                                                                                                                                                                                                                                                                                                                                                                               |                                                                                                                                                                                                                                                                                                                                                                                                                             |                                                                                                                                                                                                                                                                                                                         |      |                                                                                                                                                                                                 | <input type="checkbox"/> Tracking the relationship between child health and academic achievement through data linkage |
| 7  | 23                      | <input type="checkbox"/> Impact of preterm delivery on linguistics, oracy and academic attainment                                                                                                                                                                                                                                                                                                                                                                                                                       |                                                                                                                                                                                                                                                                                                                                                                                  |                                                                                                                                                                                                                                                                                                                                                                                                                             |                                                                                                                                                                                                                                                                                                                         |      |                                                                                                                                                                                                 |                                                                                                                       |
| 8  | 24                      |                                                                                                                                                                                                                                                                                                                                                                                                                                                                                                                         |                                                                                                                                                                                                                                                                                                                                                                                  |                                                                                                                                                                                                                                                                                                                                                                                                                             |                                                                                                                                                                                                                                                                                                                         |      |                                                                                                                                                                                                 |                                                                                                                       |
| 9  | 25                      |                                                                                                                                                                                                                                                                                                                                                                                                                                                                                                                         |                                                                                                                                                                                                                                                                                                                                                                                  |                                                                                                                                                                                                                                                                                                                                                                                                                             |                                                                                                                                                                                                                                                                                                                         |      |                                                                                                                                                                                                 |                                                                                                                       |
| 10 | 26                      |                                                                                                                                                                                                                                                                                                                                                                                                                                                                                                                         |                                                                                                                                                                                                                                                                                                                                                                                  |                                                                                                                                                                                                                                                                                                                                                                                                                             |                                                                                                                                                                                                                                                                                                                         |      |                                                                                                                                                                                                 |                                                                                                                       |
| 11 | 27                      |                                                                                                                                                                                                                                                                                                                                                                                                                                                                                                                         |                                                                                                                                                                                                                                                                                                                                                                                  |                                                                                                                                                                                                                                                                                                                                                                                                                             |                                                                                                                                                                                                                                                                                                                         |      |                                                                                                                                                                                                 |                                                                                                                       |
| 12 | 28                      |                                                                                                                                                                                                                                                                                                                                                                                                                                                                                                                         |                                                                                                                                                                                                                                                                                                                                                                                  |                                                                                                                                                                                                                                                                                                                                                                                                                             |                                                                                                                                                                                                                                                                                                                         |      |                                                                                                                                                                                                 |                                                                                                                       |
| 13 | 29                      |                                                                                                                                                                                                                                                                                                                                                                                                                                                                                                                         |                                                                                                                                                                                                                                                                                                                                                                                  |                                                                                                                                                                                                                                                                                                                                                                                                                             |                                                                                                                                                                                                                                                                                                                         |      |                                                                                                                                                                                                 |                                                                                                                       |
| 14 | 30                      |                                                                                                                                                                                                                                                                                                                                                                                                                                                                                                                         |                                                                                                                                                                                                                                                                                                                                                                                  |                                                                                                                                                                                                                                                                                                                                                                                                                             |                                                                                                                                                                                                                                                                                                                         |      |                                                                                                                                                                                                 |                                                                                                                       |
| 15 | 31                      |                                                                                                                                                                                                                                                                                                                                                                                                                                                                                                                         |                                                                                                                                                                                                                                                                                                                                                                                  |                                                                                                                                                                                                                                                                                                                                                                                                                             |                                                                                                                                                                                                                                                                                                                         |      |                                                                                                                                                                                                 |                                                                                                                       |
| 16 | 32                      |                                                                                                                                                                                                                                                                                                                                                                                                                                                                                                                         |                                                                                                                                                                                                                                                                                                                                                                                  |                                                                                                                                                                                                                                                                                                                                                                                                                             |                                                                                                                                                                                                                                                                                                                         |      |                                                                                                                                                                                                 |                                                                                                                       |
| 17 | 33                      |                                                                                                                                                                                                                                                                                                                                                                                                                                                                                                                         |                                                                                                                                                                                                                                                                                                                                                                                  |                                                                                                                                                                                                                                                                                                                                                                                                                             |                                                                                                                                                                                                                                                                                                                         |      |                                                                                                                                                                                                 |                                                                                                                       |
| 18 | 34                      |                                                                                                                                                                                                                                                                                                                                                                                                                                                                                                                         |                                                                                                                                                                                                                                                                                                                                                                                  |                                                                                                                                                                                                                                                                                                                                                                                                                             |                                                                                                                                                                                                                                                                                                                         |      |                                                                                                                                                                                                 |                                                                                                                       |
| 19 | 35                      |                                                                                                                                                                                                                                                                                                                                                                                                                                                                                                                         |                                                                                                                                                                                                                                                                                                                                                                                  |                                                                                                                                                                                                                                                                                                                                                                                                                             |                                                                                                                                                                                                                                                                                                                         |      |                                                                                                                                                                                                 |                                                                                                                       |
| 20 | 36                      |                                                                                                                                                                                                                                                                                                                                                                                                                                                                                                                         |                                                                                                                                                                                                                                                                                                                                                                                  |                                                                                                                                                                                                                                                                                                                                                                                                                             |                                                                                                                                                                                                                                                                                                                         |      |                                                                                                                                                                                                 |                                                                                                                       |
| 21 | 37                      |                                                                                                                                                                                                                                                                                                                                                                                                                                                                                                                         |                                                                                                                                                                                                                                                                                                                                                                                  |                                                                                                                                                                                                                                                                                                                                                                                                                             |                                                                                                                                                                                                                                                                                                                         |      |                                                                                                                                                                                                 |                                                                                                                       |
| 22 | 38                      |                                                                                                                                                                                                                                                                                                                                                                                                                                                                                                                         |                                                                                                                                                                                                                                                                                                                                                                                  |                                                                                                                                                                                                                                                                                                                                                                                                                             |                                                                                                                                                                                                                                                                                                                         |      |                                                                                                                                                                                                 |                                                                                                                       |
| 23 | 39                      |                                                                                                                                                                                                                                                                                                                                                                                                                                                                                                                         |                                                                                                                                                                                                                                                                                                                                                                                  |                                                                                                                                                                                                                                                                                                                                                                                                                             |                                                                                                                                                                                                                                                                                                                         |      |                                                                                                                                                                                                 |                                                                                                                       |
| 24 | 40                      |                                                                                                                                                                                                                                                                                                                                                                                                                                                                                                                         |                                                                                                                                                                                                                                                                                                                                                                                  |                                                                                                                                                                                                                                                                                                                                                                                                                             |                                                                                                                                                                                                                                                                                                                         |      |                                                                                                                                                                                                 |                                                                                                                       |
| 25 | 41                      |                                                                                                                                                                                                                                                                                                                                                                                                                                                                                                                         |                                                                                                                                                                                                                                                                                                                                                                                  |                                                                                                                                                                                                                                                                                                                                                                                                                             |                                                                                                                                                                                                                                                                                                                         |      |                                                                                                                                                                                                 |                                                                                                                       |
| 26 | 42                      |                                                                                                                                                                                                                                                                                                                                                                                                                                                                                                                         |                                                                                                                                                                                                                                                                                                                                                                                  |                                                                                                                                                                                                                                                                                                                                                                                                                             |                                                                                                                                                                                                                                                                                                                         |      |                                                                                                                                                                                                 |                                                                                                                       |
| 27 | 43                      |                                                                                                                                                                                                                                                                                                                                                                                                                                                                                                                         |                                                                                                                                                                                                                                                                                                                                                                                  |                                                                                                                                                                                                                                                                                                                                                                                                                             |                                                                                                                                                                                                                                                                                                                         |      |                                                                                                                                                                                                 |                                                                                                                       |
| 28 | 44                      |                                                                                                                                                                                                                                                                                                                                                                                                                                                                                                                         |                                                                                                                                                                                                                                                                                                                                                                                  |                                                                                                                                                                                                                                                                                                                                                                                                                             |                                                                                                                                                                                                                                                                                                                         |      |                                                                                                                                                                                                 |                                                                                                                       |
| 29 | 45                      |                                                                                                                                                                                                                                                                                                                                                                                                                                                                                                                         |                                                                                                                                                                                                                                                                                                                                                                                  |                                                                                                                                                                                                                                                                                                                                                                                                                             |                                                                                                                                                                                                                                                                                                                         |      |                                                                                                                                                                                                 |                                                                                                                       |
| 30 | 46                      |                                                                                                                                                                                                                                                                                                                                                                                                                                                                                                                         |                                                                                                                                                                                                                                                                                                                                                                                  |                                                                                                                                                                                                                                                                                                                                                                                                                             |                                                                                                                                                                                                                                                                                                                         |      |                                                                                                                                                                                                 |                                                                                                                       |

1  
2  
3  
4  
5  
6  
7  
8  
9  
10  
11  
12  
13  
14  
15  
16  
17  
18  
19  
20  
21  
22  
23  
24  
25  
26  
27  
28  
29  
30  
31  
32  
33  
34  
35  
36  
37  
38  
39  
40  
41  
42  
43  
44  
45  
46

| y Impact of childcare on oracy and literacy |                          |                                                                                                                              |                                                            |                                                                   |                          |               |                          |                                         |
|---------------------------------------------|--------------------------|------------------------------------------------------------------------------------------------------------------------------|------------------------------------------------------------|-------------------------------------------------------------------|--------------------------|---------------|--------------------------|-----------------------------------------|
| Environmental and Occupational Interactions | <input type="checkbox"/> | Examine impact of environmental exposures on microbiome                                                                      | <input type="checkbox"/>                                   | Adult Sleep Patterns                                              | <input type="checkbox"/> | Baby Measures | <input type="checkbox"/> | Immunology                              |
|                                             | <input type="checkbox"/> | Are there similarities between the impact of environmental exposures on families in Australia relative to families in China? | <input type="checkbox"/>                                   | Alcohol Consumption                                               | <input type="checkbox"/> | Blood         | <input type="checkbox"/> | Lactation                               |
|                                             | <input type="checkbox"/> | What is the impact of air quality on pregnancy outcomes and respiratory health?                                              | <input type="checkbox"/>                                   | Australian Eating Survey Food Frequency                           | <input type="checkbox"/> | Breast milk   | <input type="checkbox"/> | Medication Usage                        |
|                                             | <input type="checkbox"/> | Gestational elemental exposures and its impact of pre and postnatal growth and development                                   | <input type="checkbox"/>                                   | Breastfeeding Questionnaires                                      | <input type="checkbox"/> | Hair          | <input type="checkbox"/> | Microbiome                              |
|                                             |                          |                                                                                                                              | <input type="checkbox"/>                                   | Delivery Details                                                  | <input type="checkbox"/> | Toenail       | <input type="checkbox"/> | Nutrition                               |
|                                             |                          |                                                                                                                              | <input type="checkbox"/>                                   | Demographics                                                      | <input type="checkbox"/> | Urine         | <input type="checkbox"/> | Pregnancy and Pregnancy Complications   |
|                                             |                          |                                                                                                                              | <input type="checkbox"/>                                   | Depression Anxiety Stress Scale                                   | <input type="checkbox"/> |               | <input type="checkbox"/> | Respiratory                             |
|                                             |                          |                                                                                                                              | <input type="checkbox"/>                                   | Education History                                                 | <input type="checkbox"/> |               |                          |                                         |
|                                             |                          |                                                                                                                              | <input type="checkbox"/>                                   | Employment History                                                | <input type="checkbox"/> |               |                          |                                         |
|                                             |                          |                                                                                                                              | <input type="checkbox"/>                                   | Indoor/Outdoor air sample                                         | <input type="checkbox"/> |               |                          |                                         |
|                                             |                          |                                                                                                                              | <input type="checkbox"/>                                   | Medical History                                                   | <input type="checkbox"/> |               |                          |                                         |
|                                             |                          |                                                                                                                              | <input type="checkbox"/>                                   | Medication and Lifestyle                                          | <input type="checkbox"/> |               |                          |                                         |
|                                             |                          |                                                                                                                              | <input type="checkbox"/>                                   | Medication chart review for medication during labour and delivery | <input type="checkbox"/> |               |                          |                                         |
|                                             |                          |                                                                                                                              | <input type="checkbox"/>                                   | Postcode / Geocode                                                | <input type="checkbox"/> |               |                          |                                         |
|                                             |                          |                                                                                                                              | <input type="checkbox"/>                                   | Pregnancy Complications                                           | <input type="checkbox"/> |               |                          |                                         |
|                                             |                          | <input type="checkbox"/>                                                                                                     | Residential Housing Questionnaire                          | <input type="checkbox"/>                                          |                          |               |                          |                                         |
|                                             |                          | <input type="checkbox"/>                                                                                                     | Smoking Status Assessment of Quality of Life questionnaire | <input type="checkbox"/>                                          |                          |               |                          |                                         |
| Epidemiology and Health Economics           | <input type="checkbox"/> | How does health utility change throughout pregnancy and post-partum?                                                         | <input type="checkbox"/>                                   | Alcohol Consumption                                               | none                     |               | <input type="checkbox"/> | Education                               |
|                                             | <input type="checkbox"/> | Is there inequality of opportunity in parental mental health outcomes and use of mental health and other health services?    | <input type="checkbox"/>                                   | Cultural background                                               |                          |               | <input type="checkbox"/> | Medication Usage                        |
|                                             |                          |                                                                                                                              | <input type="checkbox"/>                                   | Demographics                                                      |                          |               | <input type="checkbox"/> | Mental Health and Cognitive Development |
|                                             |                          |                                                                                                                              | <input type="checkbox"/>                                   | Education history                                                 |                          |               | <input type="checkbox"/> | Pregnancy and Pregnancy Complications   |
|                                             |                          |                                                                                                                              | <input type="checkbox"/>                                   | Employment history                                                |                          |               |                          |                                         |
|                                             |                          | <input type="checkbox"/>                                                                                                     | European Quality of Life 5-Dimension                       | <input type="checkbox"/>                                          |                          |               |                          |                                         |
|                                             |                          | <input type="checkbox"/>                                                                                                     | Medical History                                            | <input type="checkbox"/>                                          |                          |               |                          |                                         |

|                             |                                                                                                                                                                                                                                                                                                                                                                                                                                                                                                                |                                                                                                                                                                                                                                            |                                                                                                                                                                                                                                                                                                                                        |                                                                                                                                                                                            |
|-----------------------------|----------------------------------------------------------------------------------------------------------------------------------------------------------------------------------------------------------------------------------------------------------------------------------------------------------------------------------------------------------------------------------------------------------------------------------------------------------------------------------------------------------------|--------------------------------------------------------------------------------------------------------------------------------------------------------------------------------------------------------------------------------------------|----------------------------------------------------------------------------------------------------------------------------------------------------------------------------------------------------------------------------------------------------------------------------------------------------------------------------------------|--------------------------------------------------------------------------------------------------------------------------------------------------------------------------------------------|
|                             | <p>y What are the payment mechanisms for health services for parents? Does travel impede their use of services?</p> <p><input type="checkbox"/> Does alcohol and substance abuse change health care utilisation during pregnancy?</p>                                                                                                                                                                                                                                                                          | <p><input type="checkbox"/> Medication Treatment*</p> <p><input type="checkbox"/> PBS/MBS data linkage*</p> <p><input type="checkbox"/> Postcode / Geocode</p> <p><input type="checkbox"/> Pregnancy Complications</p>                     | <p><input type="checkbox"/> Social Determinants of Health Outcomes</p>                                                                                                                                                                                                                                                                 |                                                                                                                                                                                            |
| Fetal growth                | <p><input type="checkbox"/> Characterise the variables contributing to idiopathic growth restriction and large for gestational age</p> <p><input type="checkbox"/> How does fetal growth influence other early life characteristics (education, physical and mental health, social behaviour)</p>                                                                                                                                                                                                              | <p><input type="checkbox"/> Delivery Details</p> <p><input type="checkbox"/> Department of Education* and NAPLAN data linkage*</p> <p><input type="checkbox"/> Medical History</p> <p><input type="checkbox"/> Pregnancy Complications</p> | <p><input type="checkbox"/> Baby Measures</p> <p><input type="checkbox"/> Cord blood</p> <p><input type="checkbox"/> Middle Cerebral Artery Doppler/Placental Artery Doppler</p> <p><input type="checkbox"/> Peapod</p> <p><input type="checkbox"/> Placenta and Placenta measures</p> <p><input type="checkbox"/> Ultrasound data</p> | <p><input type="checkbox"/> Education</p> <p><input type="checkbox"/> Neonatal/Child Body Composition and Growth</p> <p><input type="checkbox"/> Pregnancy and Pregnancy Complications</p> |
| Genomics and Bioinformatics | <p><input type="checkbox"/> The relationship between the genome, complex traits and disease, mental health, maternal and fetal health, pregnancy outcomes, and development</p> <p><input type="checkbox"/> The impact of the mitochondrial genome on pregnancy outcomes</p> <p><input type="checkbox"/> The interaction of the genome with the microbiome</p> <p><input type="checkbox"/> The role of and prevalence of somatic and de novo genomic variation</p> <p><input type="checkbox"/> Twin studies</p> | <p><input type="checkbox"/> Medical History</p> <p><input type="checkbox"/> Family History</p> <p><input type="checkbox"/> Demographics</p> <p><input type="checkbox"/> Pregnancy Complications</p>                                        | <p><input type="checkbox"/> Blood</p> <p><input type="checkbox"/> Cheek swab</p> <p><input type="checkbox"/> Cord blood</p> <p><input type="checkbox"/> Heel prick</p> <p><input type="checkbox"/> Microba swab</p> <p><input type="checkbox"/> Placenta: dimensions, samples</p> <p><input type="checkbox"/> Stool</p>                | <p><input type="checkbox"/> Mental Health and Cognitive Development</p> <p><input type="checkbox"/> Microbiome</p> <p><input type="checkbox"/> Pregnancy and Pregnancy Complications</p>   |
| Immunology                  | <p><input type="checkbox"/> The in utero and early life contributions to childhood allergy,</p>                                                                                                                                                                                                                                                                                                                                                                                                                | <p><input type="checkbox"/> Asthma control questionnaire</p> <p><input type="checkbox"/> Sino-Nasal Outcome test</p> <p><input type="checkbox"/> Medical History</p>                                                                       | <p><input type="checkbox"/> Blood</p> <p><input type="checkbox"/> Cord blood</p> <p><input type="checkbox"/> Microba swab</p>                                                                                                                                                                                                          | <p><input type="checkbox"/> Medication Usage</p> <p><input type="checkbox"/> Microbiome</p>                                                                                                |

1  
2  
3  
4  
5  
6  
7  
8  
9  
10  
11  
12  
13  
14  
15  
16  
17  
18  
19  
20  
21  
22  
23  
24  
25  
26  
27  
28  
29  
30  
31  
32  
33  
34  
35  
36  
37  
38  
39  
40  
41  
42  
43  
44  
45  
46

|                 |                                                                                                                                                                 |                                                                                            |                                          |                                                                     |
|-----------------|-----------------------------------------------------------------------------------------------------------------------------------------------------------------|--------------------------------------------------------------------------------------------|------------------------------------------|---------------------------------------------------------------------|
|                 | autoimmunity and disease development                                                                                                                            | <input type="checkbox"/> Medication and Lifestyle                                          | <input type="checkbox"/> Saliva          | <input type="checkbox"/> Pregnancy and                              |
|                 | <input type="checkbox"/> The influence of the maternal microbiome on childhood allergy, autoimmunity susceptibility and disease development                     | <input type="checkbox"/> Medication chart review for medication during labour and delivery | <input type="checkbox"/> Stool           | <input type="checkbox"/> Pregnancy complications                    |
|                 | <input type="checkbox"/> The impact of maternal and childhood infection on child health and development                                                         | <input type="checkbox"/> Pregnancy Complications                                           | <input type="checkbox"/> Urine           | <input type="checkbox"/> Respiratory                                |
|                 | <input type="checkbox"/> The relationship between child microbiome and disease                                                                                  |                                                                                            | <input type="checkbox"/> Vaginal swab    |                                                                     |
|                 | <input type="checkbox"/> How extrinsic and intrinsic factors influence the development of the immune system                                                     |                                                                                            |                                          |                                                                     |
| Kidney Function | <input type="checkbox"/> What genetics factors contribute to kidney disease and kidney disease risk? Can these mutations be reversed to prevent kidney disease? | <input type="checkbox"/> Alcohol Consumption                                               | <input type="checkbox"/> Baby Measures   | <input type="checkbox"/> Cardiovascular Function                    |
|                 | <input type="checkbox"/> What pregnancy related events compromise fetal kidney development?                                                                     | <input type="checkbox"/> Australian Eating Survey Food Frequency                           | <input type="checkbox"/> Blood           | <input type="checkbox"/> Fetal Growth                               |
|                 | <input type="checkbox"/> How does prematurity affect kidney development?                                                                                        | <input type="checkbox"/> Delivery Details                                                  | <input type="checkbox"/> Blood Pressure  | <input type="checkbox"/> Medication Usage                           |
|                 | <input type="checkbox"/> What are the population-based characteristics of kidney function?                                                                      | <input type="checkbox"/> Demographics                                                      | <input type="checkbox"/> Height          | <input type="checkbox"/> Neonatal/Child Body Composition and Growth |
|                 | <input type="checkbox"/> Determinant of infant kidney size and function                                                                                         | <input type="checkbox"/> Medical History                                                   | <input type="checkbox"/> PeaPod          | <input type="checkbox"/> Nutrition                                  |
|                 |                                                                                                                                                                 | <input type="checkbox"/> Medication and Lifestyle                                          | <input type="checkbox"/> Ultrasound data | <input type="checkbox"/> Pregnancy and Complications                |
|                 |                                                                                                                                                                 | <input type="checkbox"/> Medication chart review for medication during labour and delivery | <input type="checkbox"/> Urine           |                                                                     |
|                 |                                                                                                                                                                 | <input type="checkbox"/> Pregnancy Complications                                           | <input type="checkbox"/> Weigh, BMI      |                                                                     |
| Lactation       | <input type="checkbox"/> Characterisation of breastfeeding habits in current population and parents views on breastfeeding                                      | <input type="checkbox"/> Alcohol Consumption                                               | <input type="checkbox"/> Baby Measures   | <input type="checkbox"/> Microbiome                                 |
|                 |                                                                                                                                                                 | <input type="checkbox"/> Australian Eating Survey Food Frequency                           | <input type="checkbox"/> Breast milk     | <input type="checkbox"/> Nutrition                                  |
|                 |                                                                                                                                                                 | <input type="checkbox"/> Baby Nutrition                                                    | <input type="checkbox"/> Colostrum       | <input type="checkbox"/> Pregnancy and Complications                |
|                 |                                                                                                                                                                 | <input type="checkbox"/> Breastfeeding questionnaires                                      | <input type="checkbox"/> Height          |                                                                     |



|                                                |                                                                                                                                                                                                                                                                                                                                                                                       |                                                                                                                                                                                                                                                                                                                                                                                                     |                                                                                                                                   |                                                                                                                                                                                               |
|------------------------------------------------|---------------------------------------------------------------------------------------------------------------------------------------------------------------------------------------------------------------------------------------------------------------------------------------------------------------------------------------------------------------------------------------|-----------------------------------------------------------------------------------------------------------------------------------------------------------------------------------------------------------------------------------------------------------------------------------------------------------------------------------------------------------------------------------------------------|-----------------------------------------------------------------------------------------------------------------------------------|-----------------------------------------------------------------------------------------------------------------------------------------------------------------------------------------------|
|                                                | <p>y Identification of factors that inhibit breastfeeding in first 6 weeks postpartum</p> <p>☑ Identifying the impact of mastitis on breastfeeding continuation</p> <p>☑ Determining the impact of BMI on breastfeeding continuation</p> <p>☑ Impact of tongue tie on breastfeeding success</p>                                                                                       | <p>☑ Delivery Details</p> <p>☑ Demographics</p> <p>☑ Intention to breastfeed</p> <p>☑ Pregnancy Complications</p> <p>☑ Skin-skin contact</p> <p>☑ Time to first breastfeed</p>                                                                                                                                                                                                                      | <p>☑ Photographs of mouth and tongue</p> <p>☑ Skin swab</p> <p>☑ Vaginal swab</p> <p>☑ Videos of feeding</p> <p>☑ Weight, BMI</p> | <p>☑ Social Determinants and Health Outcomes</p>                                                                                                                                              |
| Medication Usage                               | <p>☑ To evaluate medication (prescription and non-prescription) usage patterns in mothers, partners and their children.</p> <p>☑ To assess health outcomes (beneficial or adverse) and wellbeing of mothers, partners and their children in relation to medication use</p>                                                                                                            | <p>☑ Delivery Details</p> <p>☑ Demographics</p> <p>☑ Medication and Lifestyle</p> <p>☑ Medication chart review for medication during labour and delivery</p> <p>☑ Medication Treatment*</p> <p>☑ Pregnancy Complications</p>                                                                                                                                                                        | <p>☑ Baby Measures</p>                                                                                                            | <p>☑ Immunology</p> <p>☑ Mental Health and Cognitive Development</p> <p>☑ Pregnancy and Pregnancy Complications</p>                                                                           |
| Mental Health, Brain Development and Cognition | <p>☑ The relationship between maternal mental health and wellbeing and its impact on pregnancy and child neurodevelopmental outcomes</p> <p>☑ The relationship between mental health status of partners and its impact on maternal mental health and wellbeing, pregnancy outcomes and child development</p> <p>☑ Interaction and dependencies between mental and physical health</p> | <p>☑ Assessment of Quality of Life questionnaire</p> <p>☑ Bayley Scales of Infant and Toddler Development*</p> <p>☑ Child Behaviour and Neurodevelopment*\$</p> <p>☑ Couple Satisfaction Index</p> <p>☑ Depression Anxiety Stress Scale</p> <p>☑ Edinburgh Post-natal Depression Scale</p> <p>☑ European Quality of Life 5-Dimension</p> <p>☑ Medical History</p> <p>☑ Medication and Lifestyle</p> | <p>☑ Blood</p> <p>☑ Cheek swab</p> <p>☑ Cord blood</p> <p>☑ Urine</p> <p>☑ Weight, BMI</p>                                        | <p>☑ Fetal Growth</p> <p>☑ Immunology</p> <p>☑ Medication Usage</p> <p>☑ Physical Exercise</p> <p>☑ Pregnancy and Pregnancy Complications</p> <p>☑ Social Determinants of Health Outcomes</p> |

1  
2  
3  
4  
5  
6  
7  
8  
9  
10  
11  
12  
13  
14  
15  
16  
17  
18  
19  
20  
21  
22  
23  
24  
25  
26  
27  
28  
29  
30  
31  
32  
33  
34  
35  
36  
37  
38  
39  
40  
41  
42  
43  
44  
45  
46

- y Medication chart review for medication during labour and delivery
- Medication Treatment\*
- Multidimensional Scale of Perceived Social Support
- DSM-5 Self-Rated Level 1 Cross-Cutting Symptom Measure - Adult
- Social Readjustment Rating Scale

|            |                                                                                                                                                                                               |                                                                                            |                                                         |                                                                |
|------------|-----------------------------------------------------------------------------------------------------------------------------------------------------------------------------------------------|--------------------------------------------------------------------------------------------|---------------------------------------------------------|----------------------------------------------------------------|
| Microbiome | <input type="checkbox"/> To examine the interaction between mother, father and baby microbiome (normal microbiome)                                                                            | <input type="checkbox"/> Bristol stool chart                                               | <input type="checkbox"/> Cheek swab                     | <input type="checkbox"/> Immunology                            |
|            | <input type="checkbox"/> To examine the impact of pregnancy and pregnancy complications on maternal and neonatal microbiome (infection, preterm birth, pre-eclampsia, hyperemesis gravidarum) | <input type="checkbox"/> Constipation score                                                | <input type="checkbox"/> Cord blood                     | <input type="checkbox"/> Lactation                             |
|            | <input type="checkbox"/> To examine the role of nutrition, feeding and supplement usage in microbiome development and stability (method of feeding, vitamin/mineral supplementation)          | <input type="checkbox"/> Demographics                                                      | <input type="checkbox"/> Microba swab                   | <input type="checkbox"/> Medication Usage                      |
|            | <input type="checkbox"/> To examine the impact of medical interventions pre- and post-conception on the microbiome (IVF, medications)                                                         | <input type="checkbox"/> Family History                                                    | <input type="checkbox"/> Placenta and Placenta Measures | <input type="checkbox"/> Pregnancy and Pregnancy Complications |
|            | <input type="checkbox"/> The characteristics of the vaginal microbiome in complicated pregnancies                                                                                             | <input type="checkbox"/> Hyperemesis Questions                                             | <input type="checkbox"/> Skin swab                      |                                                                |
|            |                                                                                                                                                                                               | <input type="checkbox"/> Medical History                                                   | <input type="checkbox"/> Stool                          |                                                                |
|            |                                                                                                                                                                                               | <input type="checkbox"/> Medication and Lifestyle                                          | <input type="checkbox"/> Urine                          |                                                                |
|            |                                                                                                                                                                                               | <input type="checkbox"/> Medication chart review for medication during labour and delivery | <input type="checkbox"/> Vaginal swab                   |                                                                |
|            |                                                                                                                                                                                               | <input type="checkbox"/> Pregnancy Complications                                           |                                                         |                                                                |



|                                            |                                                                                                                                                                                                                                                                                                                                                                                                                                                                                       |                                                                                                                                                                                                                                                                                                                                                                                                                                                                                                                                                                                                |                                                                                                                                                                                                                                                                                                                       |                                                                                                                                                                                                                                                                                                      |
|--------------------------------------------|---------------------------------------------------------------------------------------------------------------------------------------------------------------------------------------------------------------------------------------------------------------------------------------------------------------------------------------------------------------------------------------------------------------------------------------------------------------------------------------|------------------------------------------------------------------------------------------------------------------------------------------------------------------------------------------------------------------------------------------------------------------------------------------------------------------------------------------------------------------------------------------------------------------------------------------------------------------------------------------------------------------------------------------------------------------------------------------------|-----------------------------------------------------------------------------------------------------------------------------------------------------------------------------------------------------------------------------------------------------------------------------------------------------------------------|------------------------------------------------------------------------------------------------------------------------------------------------------------------------------------------------------------------------------------------------------------------------------------------------------|
| Musculoskeletal function                   | <input type="checkbox"/> Is obstructive defaecation associated with mode of delivery during childbirth?<br><input type="checkbox"/> What is the prevalence, severity and impact of foot pain during pregnancy and postpartum and is predictive of peri-or post-natal prolapse?<br><input type="checkbox"/> Is physical activity in the ante- and post-natal period related to the prevalence of Pregnancy- related Low back pain, pelvic girdle pain and Stress Urinary Incontinence? | <input type="checkbox"/> Adult Sleep Patterns<br><input type="checkbox"/> Bristol stool chart<br><input type="checkbox"/> Constipation score<br><input type="checkbox"/> Demographics<br><input type="checkbox"/> Employment History<br><input type="checkbox"/> Medical History<br><input type="checkbox"/> Musculoskeletal function<br><input type="checkbox"/> Physical Activity<br><input type="checkbox"/> Pregnancy Complications<br><input type="checkbox"/> Pregnancy History<br><input type="checkbox"/> Residential Housing Questionnaire<br><input type="checkbox"/> Smoking Status | <input type="checkbox"/> Height<br><input type="checkbox"/> Weight, BMI<br><input type="checkbox"/> Blood                                                                                                                                                                                                             | <input type="checkbox"/> Pregnancy and Pregnancy Complications<br><input type="checkbox"/> Physical Exercise                                                                                                                                                                                         |
| Neonatal/Child Body Composition and Growth | <input type="checkbox"/> Is infant body composition related to later health and disease?<br><input type="checkbox"/> Characterisation of body composition from in utero to early life<br><input type="checkbox"/> Genetic factors that contribute to obesity in childhood<br><input type="checkbox"/> Impact of preterm delivery on body composition<br><input type="checkbox"/> What is the contribution of early life nutrient to body composition over time                        | <input type="checkbox"/> Baby Nutrition*<br><input type="checkbox"/> Breastfeeding questionnaires<br><input type="checkbox"/> Demographics<br><input type="checkbox"/> Feeding your baby<br><input type="checkbox"/> Medical History<br><input type="checkbox"/> Medication and Lifestyle<br><input type="checkbox"/> Pregnancy Complications<br><input type="checkbox"/> PBS/MBS data linkage*                                                                                                                                                                                                | <input type="checkbox"/> Baby measures<br><input type="checkbox"/> Cheek swab<br><input type="checkbox"/> Cord blood<br><input type="checkbox"/> Guthrie Heel Prick<br><input type="checkbox"/> NICU body measures for preterm infants<br><input type="checkbox"/> PeaPod<br><input type="checkbox"/> Ultrasound data | <input type="checkbox"/> Cardiovascular Function<br><input type="checkbox"/> Fetal Growth<br><input type="checkbox"/> Genomics and Bioinformatics<br><input type="checkbox"/> Medicine Usage<br><input type="checkbox"/> Nutrition<br><input type="checkbox"/> Pregnancy and Pregnancy Complications |
| Nutrition                                  | <input type="checkbox"/> How does maternal dietary intake, micronutrient supplement intake, and gestational weight gain change during pregnancy and the early postpartum period, and how does this compare with guidelines?                                                                                                                                                                                                                                                           | <input type="checkbox"/> Alcohol consumption<br><input type="checkbox"/> Australian Eating Survey Food Frequency<br><input type="checkbox"/> Breastfeeding Questionnaires<br><input type="checkbox"/> Delivery Details<br><input type="checkbox"/> Demographics<br><input type="checkbox"/> Medical History                                                                                                                                                                                                                                                                                    | <input type="checkbox"/> Baby measures<br><input type="checkbox"/> Bioimpedance<br><input type="checkbox"/> Blood<br><input type="checkbox"/> Height<br><input type="checkbox"/> Skin fold thickness<br><input type="checkbox"/> Waist circumference<br><input type="checkbox"/> Weight, BMI                          | <input type="checkbox"/> Education<br><input type="checkbox"/> Medication Usage<br><input type="checkbox"/> Mental Health and Cognitive Development<br><input type="checkbox"/> Microbiome                                                                                                           |

1  
2  
3  
4  
5  
6  
7  
8  
9  
10  
11  
12  
13  
14  
15  
16  
17  
18  
19  
20  
21  
22  
23  
24  
25  
26  
27  
28  
29  
30  
31  
32  
33  
34  
35  
36  
37  
38  
39  
40  
41  
42  
43  
44  
45  
46

|                                                                                                                                                                                                                                                       |                                                                                                       |                                                                                                                              |                                                                                                                                       |
|-------------------------------------------------------------------------------------------------------------------------------------------------------------------------------------------------------------------------------------------------------|-------------------------------------------------------------------------------------------------------|------------------------------------------------------------------------------------------------------------------------------|---------------------------------------------------------------------------------------------------------------------------------------|
| y What is the relationship between dietary intake and gestational weight gain across pregnancy?                                                                                                                                                       | <input type="checkbox"/> Medication and Lifestyle<br><input type="checkbox"/> Pregnancy Complications | <input type="checkbox"/> Placenta and Placenta Measures<br><input type="checkbox"/> Stool<br><input type="checkbox"/> PeaPod | <input type="checkbox"/> Neonatal/Child Body Composition and Growth<br><input type="checkbox"/> Pregnancy and Pregnancy Complications |
| <input type="checkbox"/> What is the relationship between maternal and paternal characteristics and (i) dietary and (ii) gestational weight gain guideline attainment?                                                                                |                                                                                                       |                                                                                                                              |                                                                                                                                       |
| <input type="checkbox"/> What maternal characteristics mediate the relationship between dietary intake/micronutrient supplement intake and nutrient status during pregnancy and the early postpartum period, and how does this affect birth outcomes? |                                                                                                       |                                                                                                                              |                                                                                                                                       |
| <input type="checkbox"/> What is the relationship between maternal dietary intake/micronutrient supplementation and her gut microbiome, and how does this affect birth outcomes?                                                                      |                                                                                                       |                                                                                                                              |                                                                                                                                       |

|          |                                                                                                  |                                                                                                                                                                                                                                |                                     |                                                                |
|----------|--------------------------------------------------------------------------------------------------|--------------------------------------------------------------------------------------------------------------------------------------------------------------------------------------------------------------------------------|-------------------------------------|----------------------------------------------------------------|
| Oncology | <input type="checkbox"/> Pregnancy and melanoma risk                                             | <input type="checkbox"/> Alcohol consumption                                                                                                                                                                                   | <input type="checkbox"/> Breastmilk | <input type="checkbox"/> Genomics and Bioinformatics           |
|          | <input type="checkbox"/> Breast cancer and breastfeeding                                         | <input type="checkbox"/> Australian Eating Survey Food Frequency                                                                                                                                                               | <input type="checkbox"/> Blood      | <input type="checkbox"/> Lactation                             |
|          | <input type="checkbox"/> Origins of childhood cancer                                             | <input type="checkbox"/> Baby Nutrition*                                                                                                                                                                                       | <input type="checkbox"/> Placenta   | <input type="checkbox"/> Medication Usage                      |
|          | <input type="checkbox"/> Lifestyle factors and risk of cancer                                    | <input type="checkbox"/> Breastfeeding Questionnaires                                                                                                                                                                          | <input type="checkbox"/> Saliva     | <input type="checkbox"/> Nutrition                             |
|          | <input type="checkbox"/> Ovarian cancer and pregnancy                                            | <input type="checkbox"/> Demographics                                                                                                                                                                                          |                                     | <input type="checkbox"/> Pregnancy and Pregnancy Complications |
|          | <input type="checkbox"/> Identification of risk factors for melanoma during pregnancy and beyond | <input type="checkbox"/> Exposure Measurements (Water, Sun, Chemicals, Pesticides)*<br><input type="checkbox"/> Family History<br><input type="checkbox"/> Malignant melanoma risk<br><input type="checkbox"/> Medical History |                                     |                                                                |

|                                       |                                                                                                                                            |                                           |                                  |                                           |
|---------------------------------------|--------------------------------------------------------------------------------------------------------------------------------------------|-------------------------------------------|----------------------------------|-------------------------------------------|
|                                       |                                                                                                                                            | y Medical Scans (x-ray, PET, CAT)*        |                                  |                                           |
|                                       |                                                                                                                                            | y Medication and Lifestyle                |                                  |                                           |
|                                       |                                                                                                                                            | y Medication Treatment*                   |                                  |                                           |
|                                       |                                                                                                                                            | y Pregnancy Complications                 |                                  |                                           |
| Physical Exercise                     | y Activity changes with pregnancy                                                                                                          | y Alcohol Consumption                     | y Baby Measures                  | y Education                               |
|                                       | y The effect of exercise during pregnancy on domains of early childhood development                                                        | y Australian Eating Survey Food Frequency | y Blood                          | y Medication Usage                        |
|                                       | y How does activity in Australian women now compare to the Australian women's longitudinal study data of aged matched women from the 1990s | y Demographics                            | y Cord blood                     | y Mental Health and Cognitive Development |
|                                       | y The role of movement across the day on maternal mental health                                                                            | y Family History                          | y Height                         | y Nutrition                               |
|                                       | y Effect on physical activity on placental thickness                                                                                       | y Medical History                         | y Placenta                       | y Pregnancy and Complications             |
|                                       |                                                                                                                                            | y Medication and Lifestyle                | y Placenta and Placenta Measures | y Social Determinants and Health Outcomes |
|                                       |                                                                                                                                            | y Physical Activity                       | y Saliva                         |                                           |
|                                       |                                                                                                                                            | y Smoking Status                          | y Weight, BMI                    |                                           |
| Pregnancy and Pregnancy Complications | y What are the pregnancy related risk factors, placenta function and outcomes associated with PE, PTD, GD, IUGR?                           | y Alcohol Consumption                     | y Baby Measures                  | y Fetal Growth                            |
|                                       | y Placental micronutrient environment and its relationship to maternal nutrition                                                           | y Asthma Control Questionnaire            | y Blood                          | y Genomics and Bioinformatics             |
|                                       | y The impact of endocrine disruptors on thyroid function and placental TSH pathways                                                        | y Australian Eating Survey Food Frequency | y Cheek swab                     | y Microbiome                              |
|                                       | y Link between genetics and pregnancy complications                                                                                        | y Delivery Details                        | y Cord Blood                     | y Neonatal/Child Body Composition         |
|                                       |                                                                                                                                            | y Demographics                            | y Guthrie blood spot             | y Nutrition                               |
|                                       |                                                                                                                                            | y Family History                          | y Placenta and Placenta Measures |                                           |
|                                       |                                                                                                                                            | y Hyperemesis questions                   | y Ultrasound Data                |                                           |
|                                       |                                                                                                                                            | y Medical History                         | y Vaginal swab                   |                                           |
|                                       |                                                                                                                                            | y Pregnancy Complications                 |                                  |                                           |

|                             |                                                                                                                                                                                                                                                                                                                                                                                                                                                                                                                           |                                                                                                                                                                                                                                                                                                                                                                                                                                                               |                                                                                                                                                                                                       |                                                                                                                                                                                               |
|-----------------------------|---------------------------------------------------------------------------------------------------------------------------------------------------------------------------------------------------------------------------------------------------------------------------------------------------------------------------------------------------------------------------------------------------------------------------------------------------------------------------------------------------------------------------|---------------------------------------------------------------------------------------------------------------------------------------------------------------------------------------------------------------------------------------------------------------------------------------------------------------------------------------------------------------------------------------------------------------------------------------------------------------|-------------------------------------------------------------------------------------------------------------------------------------------------------------------------------------------------------|-----------------------------------------------------------------------------------------------------------------------------------------------------------------------------------------------|
|                             | y Placental iron transfer and iron bioavailability in infants of asthmatic mothers                                                                                                                                                                                                                                                                                                                                                                                                                                        |                                                                                                                                                                                                                                                                                                                                                                                                                                                               |                                                                                                                                                                                                       |                                                                                                                                                                                               |
|                             | y The role of eicosanoids in mid-late gestation                                                                                                                                                                                                                                                                                                                                                                                                                                                                           |                                                                                                                                                                                                                                                                                                                                                                                                                                                               |                                                                                                                                                                                                       |                                                                                                                                                                                               |
| Respiratory                 | <ul style="list-style-type: none"> <li>y What is the prevalence of asthma in the reproductive age population?</li> <li>y Does maternal asthma worsen with pregnancy and is it related to environmental pollutants?</li> <li>y What pregnancy related variables influence the development of asthma in childhood?</li> <li>y How does rhinitis in pregnancy influence neonatal outcome?</li> </ul>                                                                                                                         | <ul style="list-style-type: none"> <li>y Alcohol Consumption</li> <li>y Asthma Control Questionnaire</li> <li>y Delivery Details</li> <li>y Demographics</li> <li>y Exacerbation Questionnaire</li> <li>y Family History</li> <li>y Medical History</li> <li>y Medication and Lifestyle</li> <li>y Physical Activity</li> <li>y Pregnancy Complications</li> <li>y Sino-nasal Outcome Test</li> <li>y Smoking Status</li> </ul>                               | <ul style="list-style-type: none"> <li>y Blood</li> <li>y Height</li> <li>y Photographs of Rash</li> <li>y Weight, BMI</li> </ul>                                                                     | <ul style="list-style-type: none"> <li>y Immunology</li> <li>y Medication Usage</li> <li>y Pregnancy and Pregnancy Complications</li> </ul>                                                   |
| Sleep and Circadian Rhythms | <ul style="list-style-type: none"> <li>y Impact of parental sleep and stress on parental physical, social and mental health</li> <li>y Impact of pregnancy on sleep patterns and sleep disturbance</li> <li>y Relationship between early identification of snoring and sleep disturbance with pregnancy complications: gestational diabetes, pre-eclampsia, fetal growth restriction, preterm delivery, autism</li> <li>y Impact of parental and child sleep on child development and physical health outcomes</li> </ul> | <ul style="list-style-type: none"> <li>y Adult Sleep Patterns</li> <li>y Australian Eating Survey Food Frequency</li> <li>y Couple Satisfaction Index</li> <li>y Delivery Details</li> <li>y Demographics</li> <li>y Depression Anxiety Stress Scale</li> <li>y Edinburgh Post-natal Depression Scale</li> <li>y European Quality of Life 5-Dimension</li> <li>y Infant sleep diary</li> <li>y Medical History</li> <li>y Medication and Lifestyle</li> </ul> | <ul style="list-style-type: none"> <li>y Baby Measures</li> <li>y Height</li> <li>y Weight, BMI</li> <li>y Bioimpedance</li> <li>y NICU body measures in preterm infants</li> <li>y Peapod</li> </ul> | <ul style="list-style-type: none"> <li>y Education</li> <li>y Mental Health and Cognitive Development</li> <li>y Medication Usage</li> <li>y Pregnancy and Pregnancy Complications</li> </ul> |

|                                        |                                                                                                                                                                                                                                                                                                                                                                                                                                                                                                                                                                                                                                                                                                                                               |                                                                                                                                                                                                                                                                                                                                                                                                                                                                                                                                                                                                                                                                                                                                                                                                                         |      |                                                                                                                                                                                                                                                                                                                   |
|----------------------------------------|-----------------------------------------------------------------------------------------------------------------------------------------------------------------------------------------------------------------------------------------------------------------------------------------------------------------------------------------------------------------------------------------------------------------------------------------------------------------------------------------------------------------------------------------------------------------------------------------------------------------------------------------------------------------------------------------------------------------------------------------------|-------------------------------------------------------------------------------------------------------------------------------------------------------------------------------------------------------------------------------------------------------------------------------------------------------------------------------------------------------------------------------------------------------------------------------------------------------------------------------------------------------------------------------------------------------------------------------------------------------------------------------------------------------------------------------------------------------------------------------------------------------------------------------------------------------------------------|------|-------------------------------------------------------------------------------------------------------------------------------------------------------------------------------------------------------------------------------------------------------------------------------------------------------------------|
|                                        | y Relationship between environmental and biological factors with parental and child sleep                                                                                                                                                                                                                                                                                                                                                                                                                                                                                                                                                                                                                                                     | <input type="checkbox"/> Multidimensional Scale of Perceived Social Support<br><input type="checkbox"/> Physical Activity<br><input type="checkbox"/> DSM-5 Self-Rated Level 1 Cross-Cutting Symptom Measure - Adult<br><input type="checkbox"/> Social Readjustment Rating Scale<br><input type="checkbox"/> Pregnancy Complications                                                                                                                                                                                                                                                                                                                                                                                                                                                                                   |      |                                                                                                                                                                                                                                                                                                                   |
| Social Determinants of Health Outcomes | <input type="checkbox"/> Impact of social disadvantage on maternal, paternal health in Qld<br><input type="checkbox"/> Does parental social determinants of health (housing, education, employment) impact on pregnancy and birth outcomes?<br><input type="checkbox"/> Social networks and their impact on child development<br><input type="checkbox"/> Social disadvantage and its impact on child nutrition, cognitive development and subsequent child educational outcomes<br><input type="checkbox"/> What are the characteristics of individuals who are resilient in the face of early life adversity?<br><input type="checkbox"/> How does developmental trauma and early adversity among individuals affect long-term trajectories | <input type="checkbox"/> Childcare<br><input type="checkbox"/> Demographics<br><input type="checkbox"/> Depression Anxiety Stress Scale<br><input type="checkbox"/> Edinburgh Post-natal Depression Scale<br><input type="checkbox"/> Education History<br><input type="checkbox"/> Employment History<br><input type="checkbox"/> European Quality of Life 5-Dimension<br><input type="checkbox"/> Family history<br><input type="checkbox"/> Multidimensional Scale of Perceived Social Support<br><input type="checkbox"/> Physical Activity<br><input type="checkbox"/> DSM-5 Self-Rated Level 1 Cross-Cutting Symptom Measure - Adult<br><input type="checkbox"/> PBS/MBS Data Linkage*<br><input type="checkbox"/> Residential housing questionnaire<br><input type="checkbox"/> Social Readjustment Rating Scale | none | <input type="checkbox"/> Education<br><input type="checkbox"/> Epidemiology and Health Economics<br><input type="checkbox"/> Genomics<br><input type="checkbox"/> Mental Health and Cognitive Development<br><input type="checkbox"/> Nutrition<br><input type="checkbox"/> Pregnancy and Pregnancy complications |

1  
2  
3  
4  
5  
6  
7  
8  
9  
10  
11  
12  
13  
14  
15  
16  
17  
18  
19  
20  
21  
22  
23  
24  
25  
26  
27  
28  
29  
30  
31  
32  
33  
34  
35  
36  
37  
38  
39  
40  
41  
42  
43  
44  
45  
46

Supplementary Table 1: Secondary Outcomes according to the 21 themes that make the QFC Research Collaborative. Research measures and samples used to address the secondary outcomes and the collaborations involved in addressing these questions. \*Collection measures planned for the future \$Age appropriate measures to be collected in the future.

For peer review only

STROBE Statement—Checklist of items that should be included in reports of *cohort studies*

|                           | Item No | Recommendation                                                                                                                                                                                                                                                                                                         | Page No |
|---------------------------|---------|------------------------------------------------------------------------------------------------------------------------------------------------------------------------------------------------------------------------------------------------------------------------------------------------------------------------|---------|
| <b>Title and abstract</b> | 1       | (a) Indicate the study's design with a commonly used term in the title or the abstract<br>(b) Provide in the abstract an informative and balanced summary of what was done and what was found                                                                                                                          | 1<br>3  |
| <b>Introduction</b>       |         |                                                                                                                                                                                                                                                                                                                        |         |
| Background/rationale      | 2       | Explain the scientific background and rationale for the investigation being reported                                                                                                                                                                                                                                   | 5       |
| Objectives                | 3       | State specific objectives, including any prespecified hypotheses                                                                                                                                                                                                                                                       | 7       |
| <b>Methods</b>            |         |                                                                                                                                                                                                                                                                                                                        |         |
| Study design              | 4       | Present key elements of study design early in the paper                                                                                                                                                                                                                                                                | 8       |
| Setting                   | 5       | Describe the setting, locations, and relevant dates, including periods of recruitment, exposure, follow-up, and data collection                                                                                                                                                                                        | 8-9     |
| Participants              | 6       | (a) Give the eligibility criteria, and the sources and methods of selection of participants. Describe methods of follow-up<br>(b) For matched studies, give matching criteria and number of exposed and unexposed                                                                                                      | 8-9     |
| Variables                 | 7       | Clearly define all outcomes, exposures, predictors, potential confounders, and effect modifiers. Give diagnostic criteria, if applicable                                                                                                                                                                               | 20-25   |
| Data sources/measurement  | 8*      | For each variable of interest, give sources of data and details of methods of assessment (measurement). Describe comparability of assessment methods if there is more than one group                                                                                                                                   | 20-25   |
| Bias                      | 9       | Describe any efforts to address potential sources of bias                                                                                                                                                                                                                                                              | 11      |
| Study size                | 10      | Explain how the study size was arrived at                                                                                                                                                                                                                                                                              | 10      |
| Quantitative variables    | 11      | Explain how quantitative variables were handled in the analyses. If applicable, describe which groupings were chosen and why                                                                                                                                                                                           | 20-25   |
| Statistical methods       | 12      | (a) Describe all statistical methods, including those used to control for confounding<br>(b) Describe any methods used to examine subgroups and interactions<br>(c) Explain how missing data were addressed<br>(d) If applicable, explain how loss to follow-up was addressed<br>(e) Describe any sensitivity analyses | 11      |
| <b>Results</b>            |         |                                                                                                                                                                                                                                                                                                                        |         |
| Participants              | 13*     | (a) Report numbers of individuals at each stage of study—eg numbers potentially eligible, examined for eligibility, confirmed eligible, included in the study, completing follow-up, and analysed<br>(b) Give reasons for non-participation at each stage<br>(c) Consider use of a flow diagram                        | n/a     |
| Descriptive data          | 14*     | (a) Give characteristics of study participants (eg demographic, clinical, social) and information on exposures and potential confounders<br>(b) Indicate number of participants with missing data for each variable of interest<br>(c) Summarise follow-up time (eg, average and total amount)                         | n/a     |
| Outcome data              | 15*     | Report numbers of outcome events or summary measures over time                                                                                                                                                                                                                                                         | n/a     |



|    |                          |    |                                                                                                                                                                                                              |     |
|----|--------------------------|----|--------------------------------------------------------------------------------------------------------------------------------------------------------------------------------------------------------------|-----|
| 1  | Main results             | 16 | (a) Give unadjusted estimates and, if applicable, confounder-adjusted estimates and their precision (eg, 95% confidence interval). Make clear which confounders were adjusted for and why they were included | n/a |
| 2  |                          |    | (b) Report category boundaries when continuous variables were categorized                                                                                                                                    |     |
| 3  |                          |    | (c) If relevant, consider translating estimates of relative risk into absolute risk for a meaningful time period                                                                                             |     |
| 4  | Other analyses           | 17 | Report other analyses done—eg analyses of subgroups and interactions, and sensitivity analyses                                                                                                               | n/a |
| 5  | <b>Discussion</b>        |    |                                                                                                                                                                                                              |     |
| 6  | Key results              | 18 | Summarise key results with reference to study objectives                                                                                                                                                     | 14  |
| 7  | Limitations              | 19 | Discuss limitations of the study, taking into account sources of potential bias or imprecision. Discuss both direction and magnitude of any potential bias                                                   | 15  |
| 8  | Interpretation           | 20 | Give a cautious overall interpretation of results considering objectives, limitations, multiplicity of analyses, results from similar studies, and other relevant evidence                                   | 14  |
| 9  | Generalisability         | 21 | Discuss the generalisability (external validity) of the study results                                                                                                                                        | 14  |
| 10 | <b>Other information</b> |    |                                                                                                                                                                                                              |     |
| 11 | Funding                  | 22 | Give the source of funding and the role of the funders for the present study and, if applicable, for the original study on which the present article is based                                                | 29  |

\*Give information separately for exposed and unexposed groups.

**Note:** An Explanation and Elaboration article discusses each checklist item and gives methodological background and published examples of transparent reporting. The STROBE checklist is best used in conjunction with this article (freely available on the Web sites of PLoS Medicine at <http://www.plosmedicine.org/>, Annals of Internal Medicine at <http://www.annals.org/>, and Epidemiology at <http://www.epidem.com/>). Information on the STROBE Initiative is available at <http://www.strobe-statement.org>.

# BMJ Open

## The Queensland Family Cohort: Study Protocol

|                                 |                                                                                                                                                                                                                                                                                                                                                                                                                                                                                                                                                                                                                                                                                                                                                                                                                                                                                                                                                                                                                                                                                                                                                                                                                                                                                                                                                                                                                                                                                                                                                                                                                                                                                                                                                                                                                                                                                                                                                                                                                                                 |
|---------------------------------|-------------------------------------------------------------------------------------------------------------------------------------------------------------------------------------------------------------------------------------------------------------------------------------------------------------------------------------------------------------------------------------------------------------------------------------------------------------------------------------------------------------------------------------------------------------------------------------------------------------------------------------------------------------------------------------------------------------------------------------------------------------------------------------------------------------------------------------------------------------------------------------------------------------------------------------------------------------------------------------------------------------------------------------------------------------------------------------------------------------------------------------------------------------------------------------------------------------------------------------------------------------------------------------------------------------------------------------------------------------------------------------------------------------------------------------------------------------------------------------------------------------------------------------------------------------------------------------------------------------------------------------------------------------------------------------------------------------------------------------------------------------------------------------------------------------------------------------------------------------------------------------------------------------------------------------------------------------------------------------------------------------------------------------------------|
| Journal:                        | <i>BMJ Open</i>                                                                                                                                                                                                                                                                                                                                                                                                                                                                                                                                                                                                                                                                                                                                                                                                                                                                                                                                                                                                                                                                                                                                                                                                                                                                                                                                                                                                                                                                                                                                                                                                                                                                                                                                                                                                                                                                                                                                                                                                                                 |
| Manuscript ID                   | bmjopen-2020-044463.R1                                                                                                                                                                                                                                                                                                                                                                                                                                                                                                                                                                                                                                                                                                                                                                                                                                                                                                                                                                                                                                                                                                                                                                                                                                                                                                                                                                                                                                                                                                                                                                                                                                                                                                                                                                                                                                                                                                                                                                                                                          |
| Article Type:                   | Protocol                                                                                                                                                                                                                                                                                                                                                                                                                                                                                                                                                                                                                                                                                                                                                                                                                                                                                                                                                                                                                                                                                                                                                                                                                                                                                                                                                                                                                                                                                                                                                                                                                                                                                                                                                                                                                                                                                                                                                                                                                                        |
| Date Submitted by the Author:   | 05-Apr-2021                                                                                                                                                                                                                                                                                                                                                                                                                                                                                                                                                                                                                                                                                                                                                                                                                                                                                                                                                                                                                                                                                                                                                                                                                                                                                                                                                                                                                                                                                                                                                                                                                                                                                                                                                                                                                                                                                                                                                                                                                                     |
| Complete List of Authors:       | <p>Borg, Danielle; Mater Medical Research Institute; The University of Queensland, Faculty of Medicine</p> <p>Rae, Kym; Mater Medical Research Institute; The University of Queensland, Faculty of Medicine</p> <p>Fiveash, Corrine; Gallipoli Medical Research Foundation</p> <p>Schagen, Johanna; Mater Medical Research Institute; The University of Queensland, Faculty of Medicine</p> <p>James-McAlpine, Janelle; Mater Medical Research Institute; The University of Queensland, Faculty of Medicine</p> <p>Friedlander, Frances; Greenslopes Private Hospital, Maternity Unit</p> <p>Thurston, Claire; Mater Medical Research Institute; The University of Queensland, Faculty of Medicine</p> <p>Oliveri, Maria; Mater Medical Research Institute; The University of Queensland, Faculty of Medicine</p> <p>Harmey, Theresa; Mater Medical Research Institute; The University of Queensland, Faculty of Medicine</p> <p>Cavanagh, Erika; Queensland University of Technology, Faculty of Health; Mater Hospital Brisbane, Centre for Maternal Fetal Medicine</p> <p>Edwards, Christopher; Queensland University of Technology, Faculty of Health; Queensland University of Technology, Institute of Health &amp; Biomedical Innovation</p> <p>Fontanarosa, Davide; Queensland University of Technology, Faculty of Health; Queensland University of Technology, Institute of Health &amp; Biomedical Innovation</p> <p>Perkins, Tony; Griffith University - GC Campus, School of Medical Science</p> <p>de Zubicaray, Greig; Queensland University of Technology, Faculty of Health; Queensland University of Technology, Institute of Health &amp; Biomedical Innovation</p> <p>Moritz, Karen; The University of Queensland, Faculty of Medicine; The University of Queensland Child Health Research Centre</p> <p>Kumar, Sailesh; Mater Medical Research Institute; The University of Queensland, Faculty of Medicine</p> <p>Clifton, Vicki; Mater Medical Research Institute; The University of Queensland, Faculty of Medicine</p> |
| <b>Primary Subject Heading</b>: | Epidemiology                                                                                                                                                                                                                                                                                                                                                                                                                                                                                                                                                                                                                                                                                                                                                                                                                                                                                                                                                                                                                                                                                                                                                                                                                                                                                                                                                                                                                                                                                                                                                                                                                                                                                                                                                                                                                                                                                                                                                                                                                                    |
| Secondary Subject Heading:      | Obstetrics and gynaecology                                                                                                                                                                                                                                                                                                                                                                                                                                                                                                                                                                                                                                                                                                                                                                                                                                                                                                                                                                                                                                                                                                                                                                                                                                                                                                                                                                                                                                                                                                                                                                                                                                                                                                                                                                                                                                                                                                                                                                                                                      |
| Keywords:                       | EPIDEMIOLOGY, Physiology < NATURAL SCIENCE DISCIPLINES, Cell                                                                                                                                                                                                                                                                                                                                                                                                                                                                                                                                                                                                                                                                                                                                                                                                                                                                                                                                                                                                                                                                                                                                                                                                                                                                                                                                                                                                                                                                                                                                                                                                                                                                                                                                                                                                                                                                                                                                                                                    |

1  
2  
3  
4  
5  
6  
7  
8  
9  
10  
11  
12  
13  
14  
15  
16  
17  
18  
19  
20  
21  
22  
23  
24  
25  
26  
27  
28  
29  
30  
31  
32  
33  
34  
35  
36  
37  
38  
39  
40  
41  
42  
43  
44  
45  
46  
47  
48  
49  
50  
51  
52  
53  
54  
55  
56  
57  
58  
59  
60

|  |                                                   |
|--|---------------------------------------------------|
|  | biology < NATURAL SCIENCE DISCIPLINES, OBSTETRICS |
|  |                                                   |

SCHOLARONE™  
Manuscripts



I, the Submitting Author has the right to grant and does grant on behalf of all authors of the Work (as defined in the below author licence), an exclusive licence and/or a non-exclusive licence for contributions from authors who are: i) UK Crown employees; ii) where BMJ has agreed a CC-BY licence shall apply, and/or iii) in accordance with the terms applicable for US Federal Government officers or employees acting as part of their official duties; on a worldwide, perpetual, irrevocable, royalty-free basis to BMJ Publishing Group Ltd ("BMJ") its licensees and where the relevant Journal is co-owned by BMJ to the co-owners of the Journal, to publish the Work in this journal and any other BMJ products and to exploit all rights, as set out in our [licence](#).

The Submitting Author accepts and understands that any supply made under these terms is made by BMJ to the Submitting Author unless you are acting as an employee on behalf of your employer or a postgraduate student of an affiliated institution which is paying any applicable article publishing charge ("APC") for Open Access articles. Where the Submitting Author wishes to make the Work available on an Open Access basis (and intends to pay the relevant APC), the terms of reuse of such Open Access shall be governed by a Creative Commons licence – details of these licences and which [Creative Commons](#) licence will apply to this Work are set out in our licence referred to above.

Other than as permitted in any relevant BMJ Author's Self Archiving Policies, I confirm this Work has not been accepted for publication elsewhere, is not being considered for publication elsewhere and does not duplicate material already published. I confirm all authors consent to publication of this Work and authorise the granting of this licence.

**Title:**

The Queensland Family Cohort: Study Protocol

**Authors:**

Danielle J. Borg<sup>1,2\*</sup>, Kym M. Rae<sup>1,2\*</sup>, Corrine E. Fiveash<sup>3</sup>, Johanna M. Schagen<sup>1,2</sup>, Janelle James-McAlpine<sup>1,2</sup>, Frances Friedlander<sup>4</sup>, Claire Thurston<sup>1,2</sup>, Maria Oliveri<sup>1,2</sup>, Theresa Harmey<sup>1,2</sup>, Erika Cavanagh<sup>5,6,7</sup>, Christopher Edwards<sup>5,6</sup>, Davide Fontanarosa<sup>5,6</sup>, Tony Perkins<sup>8</sup>, Greig de Zubicaray<sup>5,6</sup>, Karen Moritz<sup>2,9</sup>, Sailesh Kumar<sup>1,2</sup>, Vicki Clifton<sup>1,2</sup> on behalf of the Queensland Family Cohort Research Collaborative<sup>10</sup>

**Author Affiliations:**

1. Mater Research Institute, Aubigny Place, South Brisbane, AUSTRALIA
2. Faculty of Medicine, University of Queensland, Brisbane, AUSTRALIA
3. Gallipoli Medical Research Foundation, Greenslopes, AUSTRALIA
4. Maternity Unit, Greenslopes Private Hospital, Greenslopes, AUSTRALIA
5. Faculty of Health, Queensland University of Technology, Brisbane, AUSTRALIA
6. Institute of Health & Biomedical Innovation, Queensland University of Technology, Brisbane, AUSTRALIA
7. Mater Centre for Maternal Fetal Medicine, South Brisbane, AUSTRALIA
8. School of Medical Science, Griffith University, Gold Coast Campus, Gold Coast, AUSTRALIA
9. Child Health Research Centre, Brisbane, AUSTRALIA
10. Queensland Family Cohort Research Collaborative

\* These authors made equal contributions

**Corresponding Author:**

Professor Vicki Clifton

Mater Research Institute

Level 3, Aubigny Place, Raymond Terrace, South Brisbane, 4101, QLD, Australia

T: 0422939723

E: vicki.clifton@mater.uq.edu.au

**Author email addresses and ORCID IDs:**

Danielle J Borg\*                      danielle.borg@mater.uq.edu.au                      0000-0001-6126-7583

Kym M. Rae\*                              kym.rae@mater.uq.edu.au                              0000-0002-6016-3464

1  
2  
3 Corrine Fiveash FiveashC@ramsayhealth.com.au 0000-0002-4700-993X  
4  
5 Johanna M. Schagen j.schagen@uq.edu.au 0000-0001-7889-8402  
6  
7 Janelle James-McAlpine janelle.mcalpine@mater.uq.edu.au 0000-0002-1157-9527  
8  
9 Frances Friedlander franfriedlander@gmail.com 0000-0003-0534-1667  
10  
11 Claire Thurston claire.thurston@mater.uq.edu.au 0000-0002-3239-218X  
12  
13 Maria Oliveri maria.oliveri@outlook.com 0000-0002-7127-5621  
14  
15 Theresa Harmey theresa.harmey@mater.uq.edu.au 0000-0002-7126-3831  
16  
17 Erika Cavanagh ej1.robinson@hdr.qut.edu.au 0000-0002-8596-0080  
18  
19 Christopher Edwards c8.edwards@qut.edu.au 0000-0001-7466-9530  
20  
21 Davide Fontanarosa d3.fontanarosa@qut.edu.au 0000-0001-6986-3718  
22  
23 Tony Perkins a.perkins@griffith.edu.au 0000-0002-9829-6772  
24  
25 Greig de Zubicaray greig.dezubicaray@qut.edu.au 0000-0003-4506-0579  
26  
27 Karen Moritz k.moritz1@uq.edu.au 0000-0002-8085-0034  
28  
29 Sailesh Kumar sailesh.kumar@mater.uq.edu.au 0000-0002-4892-6748  
30  
31 Vicki Clifton vicki.clifton@mater.uq.edu.au 0000-0003-0832-4811  
32

33  
34 **Abstract Word count:** 281

35  
36 **Total Word count (excluding abstract, summary, tables and figures):** 5,104

37  
38 **Journal:** BMJ Open

39  
40  
41 **Keywords:** Australia, longitudinal birth cohort, observational study, developmental origins  
42 of disease, pregnancy outcomes, family, early childhood outcomes, childhood outcomes,  
43 follow-up studies  
44  
45  
46  
47  
48  
49  
50  
51  
52  
53  
54  
55  
56  
57  
58  
59  
60

**Abstract**

**Introduction:** The perinatal – postnatal family environment is associated with childhood outcomes including impacts on physical and mental health and educational attainment. Family longitudinal cohort studies collect in depth data that can capture the influence of an era on family lifestyle, mental health, chronic disease, education and financial stability to enable identification of gaps in society and provide the evidence for changes in Government in policy and practice.

**Methods and analysis:** The Queensland Family Cohort (QFC) is a prospective, observational, longitudinal study that will recruit 12,500 pregnant families across the state of Queensland, Australia and intends to follow-up families and children for three decades. To identify the immediate and future health requirements of the QLD population; pregnant participants and their partners will be enrolled by 24 weeks gestation and followed-up at 24, 28 and 36 weeks gestation, during delivery, on-ward, 6 weeks post-partum, and then every 12 months where questionnaires, biological samples and physical measures will be collected from parents and children. To examine the impact of environmental exposures on families, data related to environmental pollution, household pollution and employment exposures will be linked to pregnancy and health outcomes. Where feasible, data linkage of State and Federal Government databases will be used to follow the participants long term. Biological samples will be stored long term for future discoveries of biomarkers of health and disease.

**Ethics and dissemination:** Ethical approval has been obtained from the Mater Research Ethics (HREC/16/MHS/113). Findings will be reported to (1) QFC participating families; (2) funding bodies, institutes and hospitals supporting the QFC; (3) federal, state and local governments to inform policy; (4) presented at local, national and international conferences and (5) disseminated by peer-review publications.

**Trial registration:** n/a



## Article Summary

### Strengths and limitations of this study:

#### Strengths

- In-depth data and biological sample collection of physical, social and mental well-being of mother, father/partner, and child at multiple time points
- Survey instruments based on validated tools and routinely collected clinical data
- Recognising the equal importance of the family relationships (including same sex relationships) on the child so that mothers, fathers or partners are all involved

#### Limitations

- Cultural consultation for individuals who identify as First Nations People is ongoing
- Cost to maintain cohort, infrastructure, storage of data and biobank is high, with lifelong surveillance of families dependent on philanthropic, state and/or federal support

## Background and rationale

The Developmental Origins of Health and Disease (DOHaD) proposes that the intrauterine environment, when impacted by poor maternal nutrition, severe stress or illness, has a detrimental impact on the developing child, both in the short and long term. These prenatal effects can increase the risk of cardiovascular disease, hypertension, obesity, type 2 diabetes, metabolic syndrome and kidney disease [1-3]. However, as the scientific community learns more about how health develops in adulthood, we are also recognising the influences of the paternal environment and the impacts of the intergenerational insults on fetal development [4]. Longitudinal cohort studies that follow participants over time, taking repeated measures, provide compelling data and are powerful research tools to determine associations between a variety of health outcomes and can help drive significant policy change [5].

Although there have been 17 Australian birth cohort studies so far, only 2 have been federally funded; the Longitudinal Study of Australian Children (LSAC) established in 2004 [6], and Footprints in Time: Longitudinal Study of Indigenous Children (LSIC) established in 2008 [7]. While these two cohorts began the innovative approach of linking government administrative data, with basic physical and cognitive information, these children are now aged 15 and 10 years respectively, highlighting a need for more recent data to inform policy. As children were the point of interest for each of these cohorts, important antenatal, postnatal and early life data were not collected from parents, and no biological samples were accrued.

A systematic review of longitudinal birth cohorts in Australia that included measures from one parent and offspring are shown in [Table 1](#). Of these cohorts; almost all were established over 20 years ago, only half of the studies included antenatal measures, whilst less than half involved the partner. Of studies that included partners, only 3 studies had biological samples collected from the father. Research involving individuals who identify as First Nations People was minimal and identified only 2 cohorts with specific focus on these groups: the Gudaga cohort in Sydney, New South Wales (NSW) [8] and the Aboriginal Birth Cohort (ABC) in the Northern Territory (NT) [9]. However, since the time of this publication there have been others developed in Australia, including the Gomeroi gaaynggal cohort (NSW) [10], and PANDORA cohort (NT) [11], that are solely focused on the First Nation community.

Of the Australian birth studies, the 2 largest are the Raine Study (Mothers n=2900, Babies n=2868, and Partners n=2804) and the Mater-University of Queensland Study of Pregnancy (MUSP) (Mothers n=7631, Babies n=7223, and Partners n=522) with a retention of 82% and 53% at 14 and 21 years respectively [12, 13].

1  
2  
3 The Raine Study was established in Western Australia (WA) in 1989 with a total of 2,900  
4 women birthing in Perth enrolled [14]. Infants from the cohort have been followed for 27 years.  
5 Collection of data began at 18 weeks' gestation of pregnancy and has included diverse survey  
6 topics of participants including; education, toxin exposures, breastfeeding child behaviour,  
7 physical activity, mental health from mothers, fathers, offspring, as well as biological samples  
8 from the same. Although the investigators of this cohort suggest that this is perhaps the most  
9 comprehensive longitudinal study of its kind to date in Australia, there is no doubt that  
10 significant societal change has occurred in the 30 years since it began. As such, intrauterine  
11 and paternal influences during conception and pregnancy are likely to be markedly different.  
12 Only 2 of the studies identified in the systematic review by Townsend et al., [15], originated  
13 in Queensland (QLD) - Environments for Healthy Living (EHL) Griffith birth cohort and the  
14 MUSP cohort. The larger of the two (MUSP), was established over 35 years ago and continues  
15 to follow participants with a focus on sociological and psychological outcomes [16]. While its  
16 impacts on QLD health practice and policy have been considerable, since the inception of this  
17 cohort, there have been significant societal changes. The MUSP cohort did not recruit partners,  
18 and only 4.04% (n=273 from 6,527 recruits) were First Nations People with poor retention  
19 rates of this subgroup limiting the capacity of the study to fully appreciate the health needs of  
20 First Nation families during the perinatal period [17]. The QLD population has changed  
21 significantly since 1980 with a dramatic rise in obesity rates now affecting up to 50% of the  
22 population [18], an increase in maternal age at first birth, rising rates of childhood asthma and  
23 allergy [19, 20], a significant change in dietary behaviour [21], a rise in immigration and  
24 communities with a diverse range of health problems.

25  
26  
27  
28  
29  
30  
31  
32  
33  
34  
35  
36  
37  
38  
39  
40  
41 The Environments for Healthy Living (EHL) Griffith birth cohort began in Logan, Gold Coast  
42 and Tweed regions of South-East QLD and Northern New South Wales (NSW) in 2006 [22].  
43 Unlike many other cohorts in Australia, this cohort included an investigation of social,  
44 environmental, neighbourhood and family functioning within its DOHaD-style cohort. Cord  
45 blood was also collected. This cohort was designed in partnership with another research  
46 consortium in Wales, United Kingdom so that the EHL Wales cohort could provide  
47 international comparisons. Data linkages for Medicare Benefits Scheme (MBS),  
48 Pharmaceutical Benefits Scheme (PBS) and the child's immunisation history were obtained  
49 from the Medicare records. Maternal perinatal history was obtained from health records. The  
50 EHL Griffith birth cohort ceased recruitment and follow-up of participants several years ago  
51 when funding for the study ceased.  
52  
53  
54  
55  
56  
57  
58  
59  
60

1  
2  
3 Looking to the future of birth cohorts in QLD, the Mater Hospital in Brisbane is in a strong  
4 position to establish such a cohort particularly given it has the highest birth rate in Queensland  
5 [23] and provides tertiary and quaternary level health services for both high, and low  
6 socioeconomic (SES) populations. Recently, the Queensland Family Cohort (QFC) completed  
7 a pilot feasibility study in Brisbane. The protocol for the QFC study was developed through a  
8 consultation process with QLD health researchers with expertise in DOHaD methodology. This  
9 multi-stage process resulted in a series of 21 research themes for the cohort. Each theme has  
10 its own series of questions and the methodologies to answer these have been developed by a  
11 collaborative group.  
12

13  
14 The particular strengths of this cohort design, are its 1) recruitment from entire state of QLD  
15 (1.85 million km<sup>2</sup>), which has a population of 5.2 million including approximately 4.3% First  
16 Nation community members; 2) detailed collection of physical, social and mental health data  
17 of mother, father/partner, and child; 3) biological samples collected at multiple time points  
18 from all family members; 4) all survey instruments are based on validated tools and routinely  
19 collected clinical data; 5) inclusion of biological samples were agreed by the research collective  
20 only after detailed justification by individual researchers; 6) recognising the equal importance  
21 of the family relationships on the child so that parents and partners are all involved; 7) inclusive  
22 of same sex relationships and single parents; and 8) inclusion of any participant regardless of  
23 chronic and acute health conditions.  
24

25  
26 The data obtained will enable characterisation of all participants' health and social experiences  
27 for each family unit enrolled in the study to identify the current trends in health and health  
28 behaviours. It will identify immediate and future health requirements of the QLD population  
29 which will have a significant impact on health policy and practice and help define preventative  
30 interventions required for the health of future generations of Australians. Using this rich data  
31 source, we will endeavour to understand the biological mechanisms that may contribute to  
32 adverse health outcomes in parents and their children. This will drive future interventions in  
33 health care that include lifestyle, pharmacological and clinical modifications in practice.  
34  
35  
36  
37  
38  
39  
40  
41  
42  
43  
44  
45  
46  
47  
48  
49  
50  
51  
52  
53  
54  
55  
56  
57  
58  
59  
60

## Methods and analysis

### *Study Design and Setting*

The QFC is a prospective, observational, longitudinal study that will be piloted at the Mater Mothers' Hospital (MMH) from 2018-2021 with an aim to continue for three decades. Families will be followed throughout pregnancy, childbirth and infancy via individually funded, separate follow-up studies. Long term follow-up of these participants and their children via data linkage is the aim. Although participant numbers for the pilot study have been attained, the research team continued to recruit into the cohort when COVID-19 pandemic arose in order to further understand implications of COVID-19 on families during the pandemic, albeit with a modified protocol.

Following thorough analysis of the pilot data, additional sites will be added across QLD after 2021, and will be inclusive of metropolitan, rural and remote communities. Additionally, this study will partner with First Nation communities and organisations to modify protocol methods to ensure the inclusion of these community members.

### *Inclusion criteria*

For the pilot phase of the study, pregnant individuals who are booked to deliver at the MMH will be eligible to participate. Following the pilot project however, this will extend into a multisite program across QLD health services. Pregnant individuals who are permanent residents of Australia and reside in QLD, are 12-24 weeks pregnant and their partners, if they have one, will be invited to participate in the pilot study. To ensure the cohort is representative of the QLD population, every effort will be made to invite all eligible individuals to participate in the study including those; from non-English speaking backgrounds, under the age of 18 years, with special needs, and First Nation community members. Importantly, this cohort is seeking a true understanding of the breadth of health issues for families, so that participants with any underlying serious or chronic health conditions will be eligible for inclusion in the study.

### *Exclusion criteria*

As this cohort has a significant focus on the health of the family unit, if the pregnant person would like to participate in the cohort, but their partner does not consent, or vice versa, then they will be excluded from the study. If either person is unable to give informed consent, they will be excluded from participating in the study.

### *Recruitment and Consent*

Potential pregnant participants and their partners will be approached for participation in the study by suitably qualified experienced research midwives either face-to-face, via phone or via SMS. Alternatively, potential families can also contact the study via publicity generated by social media and marketing campaigns detailing the QFC study. Regardless of the mode used to make initial contact, those interested in participating will be provided with the participant information statement prior to obtaining written consent.

### *Study Regimen*

Active data is collected from pregnant participants and their partners throughout their pregnancy, delivery and into early infancy, as shown in [Table 2](#). Active data collection will continue in multiple locations in QLD up to three years gestational age corrected, with lifelong, passive data collection via MBS and PBS data linkage.

For the pilot study, data will be collected four times during pregnancy (12-24 weeks, 24 weeks, 28 weeks and 36 weeks), at delivery, post-delivery (on the ward), and at 6 weeks post-partum. [Table 2](#) outlines items collected at each of these occasions that will be undertaken by the participant unaided, while [Table 3](#) highlights the time and those items collected with the assistance of a research team member. In brief, these will be collected as follows: *12-24 weeks* – consent and enrolment forms completed by pregnant participant and their partner; *24 week* – is a study visit for pregnant participant and partner for questionnaires, biological sample collection from both and an ultrasound growth scan; *28 and 36 weeks* – each has a study visit for pregnant participant only with questionnaires, biological samples and a ultrasound growth scan collected; *delivery* – placenta, cord blood sample collection and chart review; *on-ward visit* – chart review, questionnaire and biological samples collected from mother and baby; *6 weeks post-partum* – breastfeeding assessment, body composition of infant, questionnaires and biological sample collection from mother. Consent for data linkage will be sought for participants from the QFC pilot study.

Study data will be collected and managed using Research Electronic Data Capture (REDCap) electronic data capture tools hosted at University of Queensland [24, 25]. REDCap is a secure, web-based software platform designed to support data capture for research studies providing 1) modifiable user rights to protect identifiable data; 2) an intuitive interface for validated data capture; 3) audit trails for tracking data manipulation and export procedures; 4) automated export procedures for seamless data downloads to common statistical packages; and 5) procedures for data integration and interoperability with external sources [26, 27]. Data

1  
2  
3 collected will be entered into REDCap by a Research Nurse/Midwife, Research Assistant or  
4 another suitably trained member of the research team. Double data entry and cross validation  
5 methods will be used to ensure validity and quality of data.  
6  
7

8 The QFC Study has focused on data collection and outcomes from 21 major themes from the  
9 QFC Research Collaborative ([Figure 1](#)), each with their own series of study questions  
10 highlighted in [Supplementary Table 1](#). Data collected across the themes included participant  
11 questionnaires and routinely collected clinical data from medical charts (demographics,  
12 medication usage, medical history, pathology, medical imaging and other clinical results), as  
13 well as intervention data (biological samples, physical and psychological assessments obtained  
14 for research purposes only). Data will be collected by experienced and qualified research  
15 nurses, midwives and research assistants. Some data will be collected by research trained allied  
16 health professionals, including sonographers, dietitians, physiotherapists and psychologists  
17 prospectively from patient notes, observation charts, study specific questionnaires and  
18 assessments, photographs and videos, and electronic laboratory results by research staff and  
19 the principal investigator. Data collection forms will be electronic, except in cases where the  
20 participant does not have reliable access to a computer or the internet, or where a participant  
21 requests the use of paper forms.  
22  
23  
24  
25  
26  
27  
28  
29  
30  
31  
32

### 33 *Primary Outcomes*

34 This cohort has three primary outcomes to determine:

- 35 i) current status of parental physical and mental health and its impact on health of  
36 offspring
- 37 ii) explore genetic and biological mechanisms that drive chronic disease risk in  
38 pregnancy, in childhood and in later life and
- 39 iii) understand the influence of the environment and climate change on the health  
40 of future generations.  
41  
42  
43  
44  
45  
46  
47

### 48 *Assessments*

49 The associated measures, assessments and sample collections for the cohort are listed in Tables  
50 [2](#) and [3](#). All questionnaires for the study have been either used in routine clinical care or  
51 previously validated and references are included within the Tables where appropriate.  
52 Secondary outcomes specific to the individual themes are listed in [Supplementary Table 1](#).  
53  
54  
55  
56

### 57 *Sample Size*

58 A sample size of 12,500 QLD families was chosen so that some of the rarer complications of  
59 pregnancy can be interrogated with sufficient statistical power. For example, delivery of small-  
60



1  
2  
3 for-gestational infants occurs in approximately 6.7% QLD deliveries and a stillbirth delivery  
4 occurs in approximately 0.6% of QLD deliveries, thus warranting a large cohort size [28].  
5  
6

### 7 *Statistical analysis*

8 Missing outcome data will not be imputed in the primary analysis, as the key assumption of  
9 missing at random is not likely to hold in the analysis population. Sensitivity analyses will be  
10 conducted, however, using the multiple imputations method to explore the potential impact of  
11 missing data on outcomes. The characteristics of those participants with missing data will be  
12 compared between two treatment groups (healthy vs unhealthy outcomes). Baseline  
13 characteristics of babies and their parents will be summarised for each site, as well as overall,  
14 using descriptive statistics. Continuous variables will be reported as numbers of observed and  
15 missing values, mean, standard deviation, median and range. Categorical variables will be  
16 described as frequencies and percentages.  
17  
18  
19  
20  
21  
22  
23  
24

### 25 **Data Availability Statement**

26 Data from the QFC Study will be made available in the future for collaborative research  
27 questions. Such requests must be authorised by the Principal Investigators, the QFC Research  
28 Governance Committee and the appropriate Human Research Ethics Committees and Human  
29 Research Governance Safety Entities.  
30  
31  
32  
33

### 34 **Patient and Public Involvement**

35 The protocol for the pilot study was developed with extensive engagement within the QFC  
36 Research Collaborative community and a community engagement group including consumers  
37 (individuals aged 18-65). This group highlighted that understanding mental health and social  
38 support networks were essential for a vulnerable population such as pregnant women (and their  
39 families). Accordingly, both mental and physical wellbeing are strong components within the  
40 QFC study design ([Table 2](#)). In addition, the QFC Research Collaborative comprised of  
41 research academics and clinicians ([Figure 1](#)), identified the clinical data, biological samples  
42 and questionnaires necessary for taking a snapshot of a reproductive age population that would  
43 also capture the consumers suggestions raised in the community engagement group.  
44  
45  
46  
47  
48  
49  
50

51 The QFC team are currently working in partnership with the First Nation communities of QLD  
52 to determine how to best ensure that this protocol is truly inclusive of their community  
53 members. At the time of writing, the research team developed the terms of reference to establish  
54 a new consumer panel who are either expecting a baby; have young children or are QFC pilot  
55 participants, who will further refine the protocol design from their previous experience and  
56 preferences, for the future multisite QFC study. The QFC team will ensure that this group  
57  
58  
59  
60

1  
2  
3 includes partners, and First Nation families. QFC pilot Participants were not involved in the  
4 recruitment of the study but have provided information in the form of feedback surveys to  
5 further refine the study protocol. Lay reports will be made available to interested participants  
6 in the form of a newsletter sent to them via email and via formal invitation to a seminar day  
7 where researchers will describe individual findings.  
8  
9  
10  
11  
12

### 13 **Sources of bias**

14 One of the significant sources of bias is related to consent. Under the ethics approval given for  
15 the study, the research team can only approach potential participants to join the study if they  
16 have indicated that they are willing to be involved in ‘any research that is undertaken by Mater  
17 Health’ when they complete their antenatal enrolment forms. If the potential participant leaves  
18 this blank or indicates no, they cannot be contacted. This is likely to mean that those joining  
19 the study are coming from a pool of potential participants that may be better educated and of  
20 higher socio-economic status [29]. Although all potential pilot participants will be approached  
21 and followed-up using phone calls or SMS reminders, selection bias may be introduced for  
22 potential participants who are linguistically diverse and may fail to respond to follow-up  
23 attempts [30, 31]. Moreover, while we acknowledge that understanding the reason and  
24 demographics of families who do not consent to participant in this study would be of benefit,  
25 under the ethics approval for the pilot study, we are unable to follow-up or question a  
26 participant once they refuse contact. Like many other cohort studies, this protocol relies on the  
27 collection of self-reported data from participants. This is an inherent source of bias in self-  
28 collected data [32].  
29  
30  
31  
32  
33  
34  
35  
36  
37  
38  
39  
40

### 41 **Ethics and regulatory aspects**

#### 42 *Ethics*

43 The QFC study has been approved by the Mater Misericordia Limited Human Research Ethics  
44 and Governance Safety Committee (HREC/16/MHS/113).  
45  
46  
47  
48

#### 49 *Participant Safety*

50 All risks to the participants in the study will be mitigated by ensuring all recruitment and data  
51 collection is managed by appropriately trained and experienced research staff which have had  
52 training in empathetic, cross-cultural communication. Recruitment staff will be research nurses  
53 and midwives with extensive experience in research and clinical practice. Data will be stored  
54 in a secure setting and data linkage software will be adequately protected to maintain security  
55 and privacy.  
56  
57  
58  
59  
60

### *Study Governance*

The QFC study is overseen by the principal investigators and the QFC Research Governance Management Committee. This committee will meet every 2 months to: 1) continue to develop the strategic directions and priorities for the protocol; 2) review all sub-study applications to the cohort prior to their submission to ethics; and 3) review all unexpected findings from the analysis under an ethically defensible plan with the QFC Clinical Advisory Panel [33]. Each QFC research theme has a theme leader who will report annually and develop the individual research hypotheses within their theme. New research questions require a sub-study application that outlines what data requirements the applicant requires for their application along with their planned analysis. When approved by the QFC Research Governance Management Committee, the sub-study application and reference letter from the QFC Research Governance Committee is attached as supporting documents to a new Human Research Ethics application, where approval is sought. Most recently, the QFC Research Governance Management Committee has identified that a community-based Consumer Advisory Committee would be of benefit to the long-term development of the cohort as it continues into the future. The terms of reference for this group have been developed and its establishment is planned for late 2021.

### *Unexpected findings during examinations*

Participants are advised during the consenting process that if disclosures are required by law, or there are health concerns during routine appointments that require urgent care, that it is the duty of care of the research midwives' to disclose or escalate the issue as appropriate. If analysed data from the study were to reveal findings that bear on the wellbeing of participants, their relatives or their community, whether anticipated or incidental to the scope of the research, the QFC Research Governance Committee team will be formally notified. The QFC Research Governance Committee will create a panel of experts to cross-check research findings for accuracy (QFC Clinical Advisory Panel). Only those confirmed research findings that are clinically actionable, where there are established therapeutic or preventative interventions or other available actions, such as lifestyle changes or reproductive decisions, that have the potential to change the clinical course of the disease or improve the individual's and/or their genetic relative's quality of life, will be considered to be returnable to the participant. This panel will, in conjunction with representatives from the QFC Research Governance Committee, identify and recontact the participant initially via letter, and then by telephone [33].

### *Dissemination*

The findings from the analysis of cohort data will be disseminated in a variety of ways including abstracts, posters and presentations at conferences, and published manuscripts in peer-reviewed journals. These will also be reported to federal, state and local governments to inform policy and reports made to funding bodies, institutes and hospitals that participated in and supported the cohort study. Members of the study team will have publishing and authorship rights in accordance with NHMRC Australian Code for the Responsible Conduct of Research, the International Committee of Medical Journal Editors requirements for authorship, and as described in research agreements.

### **Discussion**

The QFC is of enormous significance to Australia, particularly to the state of QLD. The only previous longitudinal cohort established in QLD was initiated over 30 years ago [12], and whilst its contributions continue to impact on policy, this cohort sampled only within metropolitan Brisbane and failed to include rural and remote QLD communities. Since its inception, there have been significant societal changes including an increasing burden of chronic disease in adulthood, thus impacting the health outcomes of pregnancy and infancy. Additionally, the impact of other influences such as home environment [34], social determinants of health [35] and the role of fathers [4] on the child are becoming better understood, and the QFC is one of the few Australian cohorts that includes direct sampling of partners. This work will lead to identification of immediate and future health requirements of Australian families, and a solid body of evidence with which to develop well-defined intervention studies to improve health.

The unique outcomes of the QFC will include: 1) deep analysis of maternal and paternal health during antenatal and postpartum periods; 2) examination of perinatal outcomes; 3) life-course analysis of maternal, paternal and infant health outcomes; 4) analysis of biological samples to understand biological mechanisms driving health outcomes; 5) development of rich data that characterises health, social, environmental and educational experiences of family members that can lead to improve understanding of health and disease for all family members during this period. To our knowledge, there is no other cohort within Australia and very few internationally, where all these five points are incorporated into a single study cohort.

The QFC pilot study has so far demonstrated the ability to recruit pregnant participants from private and public sectors, including specialised clinics such as diabetes and refugee clinics. Participating families had individual members born in 53 different countries including

1  
2  
3 Australia, with the maternal age of conception spanning 24 years. Further, our families have  
4 identified as single (pregnant participant only), cis-gender and LGBTQIA+ members. Overall,  
5 there has been a 10.6% withdrawal rate by 6 weeks post-partum. This suggests while still  
6 ongoing, the QFC study has the ability to cover the entire range of socioeconomic and cultural  
7 groups within the QLD population.  
8  
9

10  
11 Like many longitudinal cohort studies [15], a significant limitation of the project is the cost of  
12 establishing and maintaining a cohort over a number of decades, storing its biological samples  
13 and the costs of analysis. To overcome these limitations, the principal investigator has  
14 developed this as a multi-institutional initiative that encompasses the entire state, with each  
15 institute contributing financially or in-kind towards the cohort (Figure 1). Additionally, the  
16 study protocol has not yet completed cultural consultation with the First Nations communities  
17 although it is in process with in-principal agreements from First Nation organisations as the  
18 first outcome achieved. At this point in the study, it is worth noting that the piloted participating  
19 families have been recruited in the metropolitan community of Brisbane and its findings, when  
20 reported, may not be widely applicable in rural and remote communities. In conclusion, despite  
21 the limitations, analysis of data arising from this cohort will influence policy and practice for  
22 health care that is based on the current health of QLD families, and provide further  
23 understanding of the impact of current health of family members on the health of the next  
24 generation.  
25  
26  
27  
28  
29  
30  
31  
32  
33  
34  
35  
36  
37  
38  
39  
40  
41  
42  
43  
44  
45  
46  
47  
48  
49  
50  
51  
52  
53  
54  
55  
56  
57  
58  
59  
60

**Figure 1 Legend:** The QFC Research Collaborative. Each large sphere (navy blue) represents one of the 21 research themes that compromise the QFC research collaborative. Each number represents an individual researcher (149 researchers to date). Each small sphere represents the affiliation of that particular researcher (51 collaborating institutes/universities). These affiliations are as follows: ACU (Faculty of Health Sciences); ACU (Institute for Learning Science and Teacher Education); ACU/UQ (Faculty of Health and Behavioural Sciences); Child Health Research Centre; Griffith University; James Cook University (Australian Institute of Tropical Health & Medicine); James Cook University (Department of Medicine); Mater Health; Mater Health Pathology (consultant microbiologist); Mater Health/Princess Alexander Hospital; Mater Health/Queensland Children's Hospital; Mater Research – UQ/Mater Health; Mater Research/Carbal Medical Services; Mater Research -UQ; Menzies Health Institute Queensland/Griffith University (Griffith Health); Metro South Health/QUT (Faculty of Health); Metro South Health/Princess Alexander Hospital; Monash University (Faculty of Medicine, Nursing and Health Sciences); NSW Department of Planning, Industry and Environment; Pathology Queensland; QIMR Berghofer; QUT (Faculty of Health); QUT (Faculty of Health)/Child Health Research Centre; QUT (Faculty of Science and Engineering); QUT (Faculty of Science and Engineering)/Child Health Research Centre; QUT (Faculty of Health)/UQ (Centre of Clinical Research); QUT/University of Georgia; South Australian Health and Medical Research Institute; Sun Yat- Sen University; University of Newcastle; University of Southampton; UQ (Institute for Social Science Research; Faculty of Humanities and Social Sciences); UQ (Centre of Clinical Research); UQ (Diamantina Institute); UQ (Diamantina Institute)/Dermatology Research Centre; UQ (Discipline of General Practice; Primary Care Clinical Unit); UQ (Faculty of Business, Economics & Law); UQ (Faculty of Engineering, Architecture & Information Technology); UQ (Faculty of Health and Behavioural Sciences); UQ (Faculty of Health and Behavioural Sciences)/Bond University (Faculty of Health Sciences & Medicine)/Mater Health; UQ (Faculty of Medicine); UQ (Faculty of Medicine)/Child Health Research Centre; UQ (Faculty of Medicine)/Centre for Health Services Research; UQ (Faculty of Medicine)/Mater Research-UQ; UQ (Faculty of Medicine)/Perinatal Research Centre; UQ (Faculty of Science)/UQ (Centre of Clinical Research); UQ (Institute for Molecular Bioscience); UQ (Institute for Social Science Research); UQ (Queensland Brain Institute); Wesley Hospital Monash IVF; Wesley Hospital Monash IVF/University of Melbourne.

## Tables

**Table 1:** Longitudinal birth cohorts in Australia where measures from one parent and the child were recorded. (Completed (C), Ongoing (O) and Emerging (E)).

| Decade cohort began | Cohort Name                                                            | Status | Australian State or Territory | References |
|---------------------|------------------------------------------------------------------------|--------|-------------------------------|------------|
| 1970's              | Port Pirie Cohort Study                                                | O      | SA                            | [36]       |
|                     | Adelaide Nutrition Study                                               | C      | SA                            | [37]       |
|                     | Brunswick Family Study                                                 | C      | VIC                           | [38]       |
| 1980's              | Mater- University of QLD Study of Pregnancy                            | O      | QLD                           | [12]       |
|                     | The Raine Study                                                        | O      | WA                            | [14]       |
|                     | Aboriginal Birth Cohort                                                | O      | NT                            | [39]       |
|                     | Adelaide Respiratory Cohort                                            | C      | SA                            | [40]       |
|                     | Nepean Study/ Nepean Kids Growing up Study                             | C      | NSW                           | [40]       |
| 1990's              | Generation One cohort                                                  | O      | SA                            | [41]       |
|                     | Tasmanian Infant Health Study                                          | O      | TAS                           | [42]       |
| 2000's              | Environments for health living Griffith Birth Cohort study             | C      | QLD/ NSW                      | [22]       |
|                     | Peri/Postnatal Epigenetic Study                                        | O      | VIC                           | [43]       |
|                     | Triple B Study: Bumps, Babies and Beyond                               | O      | NSW                           | [44]       |
|                     | Watch Study                                                            | O      | NSW                           | [45]       |
|                     | Gudaga Study                                                           | O      | NSW                           | [46]       |
|                     | Gomeroy gaaynggal                                                      | C      | NSW                           | [47]       |
| 2010's              | Splash                                                                 | E      | VIC                           | [48]       |
|                     | VicGen                                                                 | E      | VIC                           | [49]       |
|                     | ORIGINS                                                                | E      | WA                            | [50]       |
|                     | Pregnancy and Neonatal Diabetes Outcomes in Remote Australia (PANDORA) | E      | NT                            | [51]       |



**Table 2** Questionnaires, measures and biological samples completed by participants within the QFC cohort unaided. The appropriate references are included for validated tools. Those without references are tools used routinely in clinical care. \*Collection measures planned for the future.

| Timepoint         | Pregnant Participant                                                                                                                                                                                                                                                                                    |                                                                                                                | Partner                                                                                                                                       |                                                                                                | Baby           |                  |
|-------------------|---------------------------------------------------------------------------------------------------------------------------------------------------------------------------------------------------------------------------------------------------------------------------------------------------------|----------------------------------------------------------------------------------------------------------------|-----------------------------------------------------------------------------------------------------------------------------------------------|------------------------------------------------------------------------------------------------|----------------|------------------|
|                   | Questionnaires                                                                                                                                                                                                                                                                                          | Measures/Samples                                                                                               | Questionnaires                                                                                                                                | Measures/Samples                                                                               | Questionnaires | Measures/Samples |
| Enrolment         | Asthma Control Questionnaire (ACQ)[52]<br>Adult Sleep Pattern Questionnaire (ASPQ)[53-56]<br>Cultural background<br>Feeding your baby[57]<br>Obstetric History<br>Physical Activity[58-62]<br>Residential Housing Questionnaire (RHQ)[63]<br>-nasal Outcome Test (22 items questionnaire) (SNOT-22)[64] | none                                                                                                           | ACQ<br>ASPQ<br>Cultural background<br>Feeding your baby<br>Physical Activity<br>RHQ<br>SNOT-22                                                | none                                                                                           | none           | none             |
| 24 Week Gestation | ACQ<br>Assessment of Quality of Life Questionnaire (AQoL-6D)[65]<br>ASPQ<br>Bristol Stool Chart[66]<br>Constipation score [67]<br>Couples Satisfaction Index (CSI)[68]                                                                                                                                  | Hair Sample<br>Microba Swab<br>Saliva Sample<br>Stool Sample<br>Toenail Sample<br>Urine Sample<br>Vaginal Swab | ACQ<br>AQoL-6D<br>ASPQ<br>Bristol Stool Chart<br>Constipation score<br>CSI<br>DASS-21<br>DSM 5 CCSM<br>EQ-5D-5L<br>Full AES FFQ 2010<br>MSPSS | Hair Sample<br>Microba Swab<br>Saliva Sample<br>Stool Sample<br>Toenail Sample<br>Urine Sample | none           | none             |



Depression Anxiety  
 Stress Scale (DASS-  
 21)[69]  
 DSM-5 Self-Rated Level  
 1 Cross-Cutting  
 Symptom Measure -  
 Adult (DSM 5  
 CCSM)[70]  
 EuroQol 5-dimension  
 Questionnaire (EQ-5D-  
 5L)[71]  
 Full Australian Eating  
 Survey Food Frequency  
 Questionnaire (AES FFQ  
 2010) [72]  
 Musculoskeletal  
 Function Questionnaire  
 (MSK Questions)[73, 74]  
 Multidimensional Scale  
 of Perceived Social  
 Support (MSPSS)[75]  
 Photograph of  
 Medication  
 Physical Activity  
 RHQ  
 SNOT-22  
 Social Readjustment  
 Rating Scale (SRRS)[76]

Photograph of  
 Medication  
 Physical Activity  
 RHQ  
 SNOT-22  
 SRRS

For peer review only

|                   |             |                                                               |      |      |      |      |
|-------------------|-------------|---------------------------------------------------------------|------|------|------|------|
| 28 Week Gestation | ACQ<br>ASPQ | Microba Swab<br>Saliva Sample<br>Stool Sample<br>Urine Sample | none | none | none | none |
|-------------------|-------------|---------------------------------------------------------------|------|------|------|------|

|                     |                                                                                                                                                                                                 |                                                                                                                      |      |      |                                                                |                                                               |      |
|---------------------|-------------------------------------------------------------------------------------------------------------------------------------------------------------------------------------------------|----------------------------------------------------------------------------------------------------------------------|------|------|----------------------------------------------------------------|---------------------------------------------------------------|------|
|                     | Photograph of Medication (if changed from last appointment)                                                                                                                                     |                                                                                                                      |      |      |                                                                |                                                               |      |
|                     | Physical Activity                                                                                                                                                                               |                                                                                                                      |      |      |                                                                |                                                               |      |
|                     | SNOT-22                                                                                                                                                                                         |                                                                                                                      |      |      |                                                                |                                                               |      |
| 36 Week Gestation   | ACQ<br>ASPQ<br>Constipation score<br>Intention to breastfeed questionnaire [57]<br>MSK Questions<br>Photograph of Medication (if changed from last appointment)<br>Physical Activity<br>SNOT-22 | Saliva Sample<br>Urine Sample<br>Vaginal Swab                                                                        | none | none | none                                                           | none                                                          | none |
| Delivery            | none                                                                                                                                                                                            | none                                                                                                                 | none | none | none                                                           | none                                                          | none |
| On-Ward             | Breastfeeding questionnaire [57]                                                                                                                                                                | Colostrum/Breast Milk Sample                                                                                         | none | none | Skin-to-skin contact<br>Nutrition                              | Meconium Sample<br>Urine Sample                               |      |
| 6 Weeks Post-partum | ACQ<br>AQoL<br>ASPQ<br>Breastfeeding experience [57]<br>Bristol Stool Chart<br>Constipation score<br>Childcare<br>CSI<br>DASS-21<br>DSM 5 CCSM                                                  | Breast Milk Sample<br>Hair Sample<br>Microba Swab<br>Saliva Sample<br>Stool Sample<br>Toenail Sample<br>Urine Sample | none | none | Infant Sleep<br>Diary *<br>Nutrition [57]<br>Infant Medication | Hair Sample<br>Stool Sample<br>Toenail Sample<br>Urine Sample |      |

1  
2  
3  
4  
5  
6  
7  
8  
9  
10  
11  
12  
13  
14  
15  
16  
17  
18  
19  
20  
21  
22  
23  
24  
25  
26  
27  
28  
29  
30  
31  
32  
33  
34  
35  
36  
37  
38  
39  
40  
41  
42  
43  
44  
45  
46

Edinburgh Postnatal  
Depression Scale  
(EPDS)[77]  
EQ-5D-5L  
Full AES FFQ 2010  
MSK Questions  
MSPSS  
Photograph of  
Medication (if changed  
from last appointment)  
Physical Activity  
RHQ  
SNOT-22  
SRRS

For peer review only

**Table 3** Surveys, histories, measures and biological samples completed by participants with the assistance of a research team member.  
#Asthma/Dermatitis related

| Timepoint         | Pregnant Participant                                                                                                                          |                                                                                                                                                                  | Partner                                                                                                                                       |                                                                                                                                                          | Baby              |                                                                                                                                                                         |
|-------------------|-----------------------------------------------------------------------------------------------------------------------------------------------|------------------------------------------------------------------------------------------------------------------------------------------------------------------|-----------------------------------------------------------------------------------------------------------------------------------------------|----------------------------------------------------------------------------------------------------------------------------------------------------------|-------------------|-------------------------------------------------------------------------------------------------------------------------------------------------------------------------|
|                   | Surveys/Histories                                                                                                                             | Measures/Samples                                                                                                                                                 | Surveys/Histories                                                                                                                             | Measures/Samples                                                                                                                                         | Surveys/Histories | Measures/Samples                                                                                                                                                        |
| Enrolment         | Contact Details<br>Demographics<br>Education History<br>Employment<br>History<br>Family History<br>Malignant melanoma risk<br>Medical History | Bioimpedance<br>Blood Pressure<br>Heart rate<br>Height<br>Skin fold thickness<br>Weight                                                                          | Contact Details<br>Demographics<br>Education History<br>Employment<br>History<br>Family History<br>Malignant melanoma risk<br>Medical History | Height<br>Waist<br>Circumference<br>Weight                                                                                                               | none              | none                                                                                                                                                                    |
| 24 Week Gestation | Alcohol Consumption<br>Medication and Lifestyle<br>Substances<br>Smoking Status                                                               | Blood Sample<br>Breast Skin Swab<br>Cheek Swab<br>Bioimpedance<br>Blood Pressure<br>Heart rate<br>Skin fold thickness<br>Weight<br>Gestational Weight Gain (GWG) | Alcohol Consumption<br>Medication and Lifestyle<br>Substances<br>Smoking Status                                                               | Bioimpedance<br>Blood Pressure<br>Blood Sample<br>Cheek Swab<br>Heart rate<br>Skin fold thickness<br>Skin Swab<br>Waist<br>Circumference<br>Weight<br>WG | none              | Fetal Kidney Scan<br>Fetal Growth Scan<br>Uterine artery Doppler, US for Placental elastography<br>Neonatal Intensive Care Unit (NICU) body measures in preterm infants |
| 28 Week Gestation | Alcohol Consumption<br>Medication and Lifestyle<br>Substances<br>Smoking Status                                                               | Bioimpedance<br>Blood Pressure<br>Blood Sample<br>Heart rate<br>Saliva Sample<br>Skin fold thickness                                                             | none                                                                                                                                          | none                                                                                                                                                     | none              | Fetal Kidney Scan<br>Fetal Growth Scan<br>Uterine artery Doppler<br>Placental elastography                                                                              |

1  
2  
3  
4  
5  
6  
7  
8  
9  
10  
11  
12  
13  
14  
15  
16  
17  
18  
19  
20  
21  
22  
23  
24  
25  
26  
27  
28  
29  
30  
31  
32  
33  
34  
35  
36  
37  
38  
39  
40  
41  
42  
43  
44  
45  
46

|                   |                                                                                        |                                                                                                                                     |      |      |                                                                                       |                                                                                                                                                                                                                                                     |
|-------------------|----------------------------------------------------------------------------------------|-------------------------------------------------------------------------------------------------------------------------------------|------|------|---------------------------------------------------------------------------------------|-----------------------------------------------------------------------------------------------------------------------------------------------------------------------------------------------------------------------------------------------------|
|                   | Pregnancy Complications<br>Glucose Tolerance Tests                                     | Weight<br>GWG                                                                                                                       |      |      |                                                                                       | NICU body measures in preterm infants                                                                                                                                                                                                               |
| 36 Week Gestation | Alcohol Consumption<br>Medication and Lifestyle<br>Substances<br>Smoking Status        | Bioimpedance<br>Blood Pressure<br>Blood Sample<br>Cheek Swab<br>Heart rate<br>Saliva Sample<br>Skin fold thickness<br>Weight<br>GWG | none | none | none                                                                                  | Fetal Kidney Scan<br>Fetal Growth Scan<br>Uterine artery Doppler<br>Placental elastography<br>NICU body measures in preterm infants                                                                                                                 |
| Delivery          | Medication used during labour and delivery<br>Delivery details including complications | none                                                                                                                                | none | none | Medication used during labour and delivery<br>Delivery Details<br>Length of NICU Stay | Abdominal Circumference<br>Weight<br>Cheek Swab<br>Cord Blood or Guthrie cord blood spot<br>Guthrie heel prick<br>Head Circumference<br>Middle Upper Arm Circumference<br>Placenta dimensions, stereology, histology, weight<br>Placenta photograph |

|                                                             |                     |                                                                              |                                |      |      |                                                                                                                                |                                                                                                                            |
|-------------------------------------------------------------|---------------------|------------------------------------------------------------------------------|--------------------------------|------|------|--------------------------------------------------------------------------------------------------------------------------------|----------------------------------------------------------------------------------------------------------------------------|
| 1<br>2<br>3<br>4<br>5<br>6<br>7<br>8<br>9<br>10<br>11<br>12 | On-Ward             | Medication prescribed on ward and at discharge,                              | Blood pressure                 | none | none | Peapod<br>Photograph/Video of baby's mouth, tongue, feeding<br>Anthropometry<br>Medication prescribed on ward and at discharge | Microba Swab<br>Skin Swab                                                                                                  |
| 13<br>14<br>15<br>16<br>17<br>18<br>19<br>20<br>21<br>22    | 6 Weeks Post-partum | Alcohol Consumption<br>Medication and Lifestyle Substances<br>Smoking Status | Breast Skin Swab<br>Cheek Swab | none | none | Photographs of rash#<br>Video of feeding<br>Medical Complications (first 6 weeks of life)<br>Peapod                            | Abdominal Circumference<br>Cheek Swab<br>Head Circumference<br>Microba Swab<br>Middle Upper Arm Circumference<br>Skin Swab |

**Acknowledgements:**

We acknowledge the Yuggera People as the traditional custodians of the land in which the pilot study was conducted. We pay respect to the Elders of this community, past, present and emerging. We would like to acknowledge the families who agreed to participate in pilot stages of this cohort and look forward to their continued involvement as their family grows. We also acknowledge the contributions of the Mater Mother's Hospital, the theatre nurses, midwives in delivery and post-natal wards, Mater Pathology Staff, the placenta collection team who assisted in collection of samples when required. We would like to thank Dr Mike Beckmann and Mater Research Development, Ethics, Governance and Agreements departments for the ongoing support. We thank the staff at Microba and Qiagen for their ongoing collaboration. We would like to acknowledge the researchers and institutes who form the QFC Research Collaborative which helped support the QFC Study. Finally, we thank Dr Aimee Catalan of Catalan Group Ltd Pty for the design and production of Figure 1.

**Authors' contributions:**

DB and KR jointly wrote the manuscript; DB, KR, SK, VC designed the QFC protocol; CT, TH, JJM, FF, MO responsible for recruitment and retention of participants for QFC cohort; DB, VC, CF, JS, JJM, CT, MO, TH designed the REDCap system for QFC data management; EC, CE, DF, SK designed ultrasound data collection; EC, CE collected ultrasound data from QFC participants; DB, CF, JS designed FreezerPro system for management of QFC participants; DB, KR, CT, TP, GdZ, KM, SK, VC are members of QFC Governance committee; CF, JS, JJM, CT, MO, TH, EC, CE, DF, TP, GdZ, KM, SK, VC all reviewed and edited of manuscript on behalf of the Queensland Family Cohort Research Collaborative. All members of the QLD Family Cohort Research Collaboration were involved in establishing the aims and the design of the cohort study.



1  
2  
3 The following are members of the Queensland Family Cohort Research Collaborative and have  
4 all been integral to the overall design of the study: Adam Ewing (Mater Research Institute-UQ  
5 (MRI-UQ)), Alison Carey (QLD University of Technology (QUT)), Amanda Wheeler  
6 (Menzies Institute of Health Griffith University), Ameneh Shahaieian (Australian Catholic  
7 University (ACU)), Andrew P. Hills (MRI-UQ), Andrew Perkins (Monash University), Ann  
8 Peacock (MRI-UQ), Anne Tremellen (MRI-UQ), Annie McArdle (Mater Health), Anthony  
9 Tuckett (University of QLD (UQ)), Asad Ali (UQ), Ash Meakin (MRI-UQ), Barbara  
10 Lingwood (UQ), Barnaby Dixson (UQ), Boyi Yang (Sun Yat-Sen University), Brenda Gannon  
11 (UQ), Carlos Salomon (UQ), Caroline Salom (UQ), Cassandra Pattinson (UQ), Clare Collins  
12 (University of Newcastle (UON)), Claire Wyatt-Smith (ACU), Clare Primiero (UQ), Courtney  
13 Giles (ACU), Cynthia Turner (ACU), Daniel Schweitzer (Mater Health), Danielle Schoenaker  
14 (University of Southampton), David Evans (UQ), David Simmons (UQ), Dilani Mendis  
15 (Griffith University (GU)), Elise Pelzer (QUT), Elizabeth Hurrion (Mater Health), Emma  
16 Hamilton-Williams (UQ), Erin McMeniman (UQ), Frances Maguire (MRI-UQ), Geraint  
17 Rogers (South Australian Health and Medical Research Institute), Greg Monteith (MRI-UQ),  
18 Gregore Iven Mielke (UQ), Guang Hui Dong (Sun Yat-Sen University), Gunther Paul (James  
19 Cook University (JCU)), Helen Barrett (Mater Health), Helen Liley (Mater Health), Helen  
20 Truby (UQ), Honey Heussler (MRI-UQ), Honor Hugo (QUT), Ian Wright (JCU), Jake Gratten  
21 (UQ), Jakob Begun (MRI-UQ), James Cuffe (UQ), James Scott (QLD Institute of Medical  
22 Research- Berghofer (QIMR-B)), Janet Davies (QUT), John Cairney (UQ), John Hooper  
23 (MRI-UQ), John Upham (UQ), Josephine Forbes (MRI-UQ), Julianne McGuire (QUT), Julie  
24 Germain (Mater Health), Julie Hides (GU), Kalina Rossa (UQ), Karen Thorpe (UQ), Kassia  
25 Beetham (ACU), Katie Lee (ACU), Kerry Richard (Pathology QLD), Kristen Gibbons (MRI-  
26 UQ), Kristen Radford (MRI-UQ), Kristin Laurens (QUT), Leisa-Maree Toms (QUT), Lidia  
27 Morawska (QUT), Liisa Laasko (Mater Health), Linda Gallo (UQ), Linda Hickey (MRI-UQ),  
28 Lisa Akison (UQ), Loretta Anderson (Mater Health), Lucia Colodro-Conde (QLD Institute of  
29 Medical Research- Berghofer), Lucy Burr (Mater Health), Luke Knibbs (UQ), Lynne Daniels  
30 (QUT), Magid Fahim (Princess Alexander Hospital, QLD), Mandana Mazerheri (NSW  
31 Department of Planning, Industry and Environment), Maree Knight (MRI-UQ), Mark Green  
32 (Wesley Hospital Monash IVF), Mark Western (UQ), Marloes Dekker (UQ), Megan Rollo  
33 (UON), Melinda Smith (UQ), Meng-Wong Taing (UQ), Micheal Burke (Mater Hospital),  
34 Micheal Kimlin (QUT), Micheal Thomas (Mater Health Pathology), Michele Haynes (ACU),  
35 Mike Beckmann (Mater Health), Natasha Reid (UQ), Nicole Warrington (UQ), Nikky Isabel  
36 (Metro South Health, QLD), Olivia Holland (QUT), Paige Little (QUT), Paul Colditz (UQ),  
37  
38  
39  
40  
41  
42  
43  
44  
45  
46  
47  
48  
49  
50  
51  
52  
53  
54  
55  
56  
57  
58  
59  
60

1  
2  
3 Paul Dawson (MRI-UQ), Paul Gardiner (UQ), Penelope Lind (QIMR-B), Peter D. Sly (UQ),  
4 Peter Soyer (UQ), Rebecca Byrne (QUT), Rebecca Keating (Mater Health), Rick Sturm (UQ),  
5 Sally Schaffer (UQ), Samudragupta Bora (MRI-UQ), Sanmarie Schlebusch (Mater Health),  
6 Sarah Medland (QIMR-B), Sarah Steane (UQ), Shamsad Karatela (UQ), Shelley Wilkinson  
7 (MRI-UQ), Sheridan Guyatt (Mater Health), Simon Bowler (Mater Health), Simon Smith (UQ)  
8 Sophia Yong (UQ), Steve Erceg (Mater Health), Steve McPhail (Metro South Health QLD),  
9 Stewart Trost (UQ), Suresh Sandisivam (Mater Health), Susan de Jersey (UQ), Tara Ross  
10 (Wesley Hospital Monash IVF), Tom Cole-Hunter (QUT), Tony Kenna (QUT), Treasure  
11 McGuire (UQ), Vicki Flenady (MRI-UQ), Wendy Brodribb (UQ), Xiao-Wen Zeng (Sun Yat-  
12 Sen University), Yang Peng (UQ), Yanhe Liu (Wesley Hospital Monash IVF), Yoga  
13 Kandasamy (JCU), Zarqa Said (MRI-UQ) and Zephanie Tyack (UQ).  
14  
15  
16  
17  
18  
19  
20  
21  
22  
23

24  
25 **Funding statement:**

26 This study has received cash and in-kind funding from the following organisations and  
27 institutes: Mater Foundation (NA); University of Queensland (NA); Griffith University (NA);  
28 Queensland University of Technology (NA); Brisbane Diamantina Health Partners (grant no.  
29 1033); The Lott, Golden Casket (grant no. 75002\_GC\_20); Perpetual Impact Funding (grant  
30 no. 2041); Advanced Queensland (grant no. 2441); Qiagen (NA), and Microba (NA).  
31  
32  
33  
34  
35

36 **Competing interest statement:**

37 No competing interests  
38  
39  
40  
41  
42  
43  
44  
45  
46  
47  
48  
49  
50  
51  
52  
53  
54  
55  
56  
57  
58  
59  
60

## References

1. Barker, D., *Developmental origins of adult health and diseases*. J Epidemiol Community Health, 2004. **58**: p. 114-115.
2. Gluckman, P.D., et al., *Effect of in utero and early-life conditions on adult health and disease*. N Engl J Med **359**: p. 61-73.
3. Gluckman, P.D., M.A. Hanson, and C. Pinal, *The developmental origins of adult disease*. Maternal Child Nutrition, 2005. **1**: p. 130-141.
4. Braun, J.M., C. Messerlian, and R. Hauser, *Fathers Matter: Why It's Time to Consider the Impact of Paternal Environmental Exposures on Children's Health*. Curr Epidemiol Rep, 2017. **4**(1): p. 46-55.
5. Western, M., et al., *The case for a new Australian Birth cohort study*, C. Foelz, Editor. 2014, Institute for Social Science Research, University of Queensland, Brisbane.
6. Gray, M.a.S., *Ann. Growing Up in Australia: The Longitudinal Study of Australian Children*. 2005. 4-9.
7. Thurber, K.A., et al., *Cohort Profile: Footprints in Time, the Australian Longitudinal Study of Indigenous Children*. International Journal of Epidemiology, 2014. **44**(3): p. 789-800.
8. Comino, E., et al., *The Gudaga Study: establishing an Aboriginal birth cohort in an urban community*. Aust N Z J Public Health, 2010. **34 Suppl 1**: p. S9-17.
9. Sayers, S.M., et al., *An Australian Aboriginal birth cohort: a unique resource for a life course study of an Indigenous population. A study protocol*. BMC Int Health Hum Rights, 2003. **3**(1).
10. Ashman, A.M., et al., *A cohort of Indigenous Australian women and their children through pregnancy and beyond: the Gomeri gaaynggal study*. J Dev Orig Health Dis, 2016. **7**(4): p. 357-68.
11. Maple-Brown, L., et al., *Pregnancy And Neonatal Diabetes Outcomes in Remote Australia: the PANDORA study-an observational birth cohort*. Int J Epidemiol, 2019. **48**(1): p. 307-318.
12. Najman, J.M., et al., *Cohort Profile: The Mater-University of Queensland Study of Pregnancy (MUSP)*. Int J Epidemiol, 2005. **34**(5): p. 992-7.
13. Straker, L., et al., *Cohort Profile: The Western Australian Pregnancy Cohort (Raine) Study-Generation 2*. Int J Epidemiol, 2017. **46**(5): p. 1384-1385j.
14. Straker, L., et al., *Cohort Profile: The Western Australian Pregnancy Cohort (Raine) Study-Generation 2* International Journal of Epidemiology, 2017. **46**(5): p. 1384-1385j.
15. Townsend, M.L., et al., *Longitudinal Intergenerational Birth Cohort Designs: A Systematic Review of Australian and New Zealand Studies*. PLoS One, 2016. **11**(3): p. e0150491.
16. Najman, J.M., et al., *Cohort profile update: The Mater-University of Queensland study of pregnancy (MUSP)*. International journal of epidemiology, 2015. **44**(1): p. 78-78f.
17. Najman, J.M., et al., *Cohort Profile Update: The Mater-University of Queensland Study of Pregnancy (MUSP)*. Int J Epidemiol, 2015. **44**(1): p. 78-78f.
18. Leonie K Callaway, A.M.C., H David McIntyre and Johannes B Prins, *The prevalence and impact of overweight and obesity in an Australian obstetric population*. Med J Aust 2006. **184**(2): p. 56-59.
19. Khan, T.K., D.J. Palmer, and S.L. Prescott, *In-utero exposures and the evolving epidemiology of paediatric allergy*. Curr Opin Allergy Clin Immunol, 2015. **15**(5): p. 402-8.
20. Grieger, J.A., et al., *In utero Programming of Allergic Susceptibility*. Int Arch Allergy Immunol, 2016. **169**(2): p. 80-92.

21. Grieger, J.A., L.E. Grzeskowiak, and V.L. Clifton, *Preconception Dietary Patterns in Human Pregnancies Are Associated with Preterm Delivery*. *Journal of Nutrition*, 2014. **144**(7): p. 1075-1080.
22. Cameron, C., et al., *Environments for Healthy Living (EFHL) Griffith Birth Cohort Study: Background and Methods*. *Matern Child Health*, 2012. **16**: p. 1896–1905
23. Government, Q., *Births by Hospital*, in *Open Data Portal*. 2019: <https://www.data.qld.gov.au/dataset/births-by-hospital/resource/d3d0feaa-8929-4cb6-9fd7-eb9f40f21bcb>.
24. Harris, P., et al., *Research electronic data capture (REDCap) – A metadata-driven methodology and workflow process for providing translational research informatics support*. *J Biomed Inform*, 2009. **42**(2): p. 377-81.
25. Harris, P., et al., *The REDCap consortium: Building an international community of software partners*. *J Biomed Inform*, 2019.
26. Harris, P.A., et al., *The REDCap consortium: Building an international community of software platform partners*. *Journal of Biomedical Informatics*, 2019. **95**: p. 103208.
27. Harris, P.A., et al., *Research electronic data capture (REDCap)—A metadata-driven methodology and workflow process for providing translational research informatics support*. *Journal of Biomedical Informatics*, 2009. **42**(2): p. 377-381.
28. Welfare, A.I.o.H.a. *Australia's mothers and babies data visualisations*. 2020; Available from: <https://www.aihw.gov.au/reports/mothers-babies/australias-mothers-babies-data-visualisations/contents/stillbirths-and-neonatal-deaths>.
29. Nohr, E.A. and Z. Liew, *How to investigate and adjust for selection bias in cohort studies*. *Acta Obstetrica et Gynecologica Scandinavica*, 2018. **97**(4): p. 407-416.
30. Golding, J. and K. Birmingham, *Enrolment and response rates in a longitudinal birth cohort*. *Paediatric and Perinatal Epidemiology*, 2009. **23**(s1): p. 73-85.
31. Ng, S.-K., R. Scott, and P.A. Scuffham, *Contactable Non-responders Show Different Characteristics Compared to Lost to Follow-Up Participants: Insights from an Australian Longitudinal Birth Cohort Study*. *Maternal and Child Health Journal*, 2016. **20**(7): p. 1472-1484.
32. Althubaiti, A., *Information bias in health research: definition, pitfalls, and adjustment methods*. *Journal of multidisciplinary healthcare*, 2016. **9**: p. 211-217.
33. The National Health and Medical Research Council, t.A.R.C.a.U.A., *National Statement on Ethical Conduct in Human Research 2007 (Updated 2018)*. 2018, National Health and Medical Research Council: Commonwealth of Australia, Canberra
34. Ferguson, K.T., et al., *The physical environment and child development: an international review*. *International journal of psychology : Journal international de psychologie*, 2013. **48**(4): p. 437-468.
35. Wang, E., et al., *Social Determinants of Pregnancy-Related Mortality and Morbidity in the United States: A Systematic Review*. *Obstet Gynecol*, 2020. **135**(4): p. 896-915.
36. McMichael, A.J., et al., *The Port Pirie cohort study: maternal blood lead and pregnancy outcome*. *Journal of Epidemiology & Community Health*, 1986. **40**(1): p. 18-25.
37. Magarey, A.M., et al., *Predicting obesity in early adulthood from childhood and parental obesity*. *International journal of obesity*, 2003. **27**(4): p. 505-513.
38. Carmichael, A., H. Williams, and S. Picot, *Growth patterns, health and illness in preschool children from a multi-ethnic, poor socio-economic status municipality of Melbourne*. *Journal of paediatrics and child health*, 1990. **26**(3): p. 136-141.
39. Sayers, S.M., D. Mackerras, and G.R. Singh, *Cohort profile: the Australian aboriginal birth cohort (ABC) study*. *International journal of epidemiology*, 2017. **46**(5): p. 1383-1383f.



- 1  
2  
3 40. Douglas, R., et al., *A prospective study of proneness to acute respiratory illness in the*  
4 *first two years of life*. International journal of epidemiology, 1994. **23**(4): p. 818-826.
- 5 41. Giles, L., et al., *Growth in early life and the development of obesity by age 9 years:*  
6 *are there critical periods and a role for an early life stressor?* International journal of  
7 obesity, 2013. **37**(4): p. 513-519.
- 8 42. Trevillian, L.F., et al., *Infant sleeping environment and asthma at 7 years: a*  
9 *prospective cohort study*. American journal of public health, 2005. **95**(12): p. 2238-2245.
- 10 43. Loke, Y.J., et al., *The peri/postnatal epigenetic twins study (PETS)*. Twin Research  
11 and Human Genetics, 2013. **16**(1): p. 13-20.
- 12 44. Hutchinson, D., et al., *Cohort Profile: The Triple B Pregnancy Cohort Study: A*  
13 *longitudinal study of the relationship between alcohol, tobacco and other substance use*  
14 *during pregnancy and the health and well-being of Australian children and families*.  
15 International journal of epidemiology, 2018. **47**(1): p. 26-27m.
- 16 45. Hure, A.J., et al., *Protocol for the Women And Their Children's Health (WATCH)*  
17 *study: a cohort of pregnancy and beyond*. Journal of epidemiology, 2012. **22**(3): p. 267-275.
- 18 46. Comino, E., et al., *The Gudaga Study: establishing an Aboriginal birth cohort in an*  
19 *urban community*. Australian and New Zealand Journal of Public Health, 2010. **34**: p. S9-  
20 S17.
- 21 47. Ashman, A., et al., *A cohort of Indigenous Australian women and their children*  
22 *through pregnancy and beyond: the Gomerói gaaynggal study*. Journal of Developmental  
23 Origins of Health and Disease, 2016. **7**(4): p. 357-368.
- 24 48. de Silva-Sanigorski, A.M., et al., *Splash!: a prospective birth cohort study of the*  
25 *impact of environmental, social and family-level influences on child oral health and obesity*  
26 *related risk factors and outcomes*. BMC Public Health, 2011. **11**(1): p. 505.
- 27 49. Johnson, S., et al., *Cohort Profile: the VicGeneration (VicGen) study: an Australian*  
28 *oral health birth cohort*. International journal of epidemiology, 2017. **46**(1): p. 29-30.
- 29 50. Hagemann, E., et al., *The ORIGINS Project*, in *Pre-emptive Medicine: Public Health*  
30 *Aspects of Developmental Origins of Health and Disease*. 2019, Springer. p. 99-116.
- 31 51. Maple-Brown, L., et al., *Pregnancy And Neonatal Diabetes Outcomes in Remote*  
32 *Australia: the PANDORA study—an observational birth cohort*. International journal of  
33 epidemiology, 2019. **48**(1): p. 307-318.
- 34 52. Juniper, E.F., et al., *Development and validation of a questionnaire to measure*  
35 *asthma control*. Eur Respir J, 1999. **14**(4): p. 902-7.
- 36 53. Cella, D., et al., *PROMIS® Adult Health Profiles: Efficient Short-Form Measures of*  
37 *Seven Health Domains*. Value in Health, 2019. **22**(5): p. 537-544.
- 38 54. Monk, T.H., et al., *Measuring Sleep Habits Without Using a Diary: The Sleep Timing*  
39 *Questionnaire*. Sleep, 2003. **26**(2): p. 208-212.
- 40 55. Morin, C.M., et al., *The Insomnia Severity Index: psychometric indicators to detect*  
41 *insomnia cases and evaluate treatment response*. Sleep, 2011. **34**(5): p. 601-608.
- 42 56. Roenneberg, T., M. Wirz-Justice A Fau - Mellow, and M. Mellow, *Life between*  
43 *clocks: daily temporal patterns of human chronotypes*. Journal of biological rhythms, 2003.  
44 **18**(0748-7304 (Print)): p. 80-90.
- 45 57. Adhikari, P. and M. Cooper-Stanbury. *Australian National Infant Feeding Survey,*  
46 *2010*. 2018; Available from: <http://dx.doi.org/10.26193/LD6OFT>.
- 47 58. Brown, W.J., et al., *Reliability and validity of a modified self-administered version of*  
48 *the Active Australia physical activity survey in a sample of mid-age women*. Australian and  
49 New Zealand Journal of Public Health, 2008. **32**(6): p. 535-541.
- 50 59. Craig, C.L., et al., *International physical activity questionnaire: 12-country reliability*  
51 *and validity*. Med Sci Sports Eerc, 2003. **35**(8): p. 1381-95.
- 52  
53  
54  
55  
56  
57  
58  
59  
60

- 1
  - 2
  - 3
  - 4
  - 5
  - 6
  - 7
  - 8
  - 9
  - 10
  - 11
  - 12
  - 13
  - 14
  - 15
  - 16
  - 17
  - 18
  - 19
  - 20
  - 21
  - 22
  - 23
  - 24
  - 25
  - 26
  - 27
  - 28
  - 29
  - 30
  - 31
  - 32
  - 33
  - 34
  - 35
  - 36
  - 37
  - 38
  - 39
  - 40
  - 41
  - 42
  - 43
  - 44
  - 45
  - 46
  - 47
  - 48
  - 49
  - 50
  - 51
  - 52
  - 53
  - 54
  - 55
  - 56
  - 57
  - 58
  - 59
  - 60
60. Rosenberg, D.E., et al., *Assessment of sedentary behavior with the International Physical Activity Questionnaire*. J Phys Act Health, 2008. **5**: p. S30-S44.
61. Statistics, A.B.o., *National Health Survey Questionnaire*. 2018.
62. Wendy, J.B. and P. Toby, *Physical Activity in Mid-Age and Older Women: Lessons from the Australian Longitudinal Study on Women's Health*. Kinesiology Review, 2016. **5**(1): p. 87-97.
63. He, C., et al., *The impact of flood and post-flood cleaning on airborne microbiological and particle contamination in residential houses*. Environment International, 2014. **69**: p. 9-17.
64. Hopkins, C., et al., *Psychometric validity of the 22-item Sinonasal Outcome Test*. Clinical Otolaryngology, 2009. **34**(5): p. 447-454.
65. Richardson, J.R.J., et al., *Construction of the descriptive system for the assessment of quality of life AQoL-6D utility instrument*. Health and Quality of Life Outcomes, 2012. **10**(1): p. 38.
66. O'Donnell, L.J., J. Virjee, and K.W. Heaton, *Detection of pseudodiarrhoea by simple clinical assessment of intestinal transit rate*. BMJ (Clinical research ed.), 1990. **300**(6722): p. 439-440.
67. Agachan, F., et al., *A constipation scoring system to simplify evaluation and management of constipated patients*. Dis Colon Rectum, 1996. **39**(6): p. 681-5.
68. Funk, J.L. and R.D. Rogge, *Testing the ruler with item response theory: increasing precision of measurement for relationship satisfaction with the Couples Satisfaction Index*. J Fam Psychol, 2007. **21**(4): p. 572-83.
69. Lovibond, P.F. and S.H. Lovibond, *The structure of negative emotional states: comparison of the Depression Anxiety Stress Scales (DASS) with the Beck Depression and Anxiety Inventories*. Behav Res Ther, 1995. **33**(3): p. 335-43.
70. Clarke, D.E. and E.A. Kuhl, *DSM-5 cross-cutting symptom measures: a step towards the future of psychiatric care?* World psychiatry : official journal of the World Psychiatric Association (WPA), 2014. **13**(3): p. 314-316.
71. Herdman, M., et al., *Development and preliminary testing of the new five-level version of EQ-5D (EQ-5D-5L)*. Qual Life Res., 2011(1573-2649 (Electronic)).
72. Collins, C.E., et al., *Reproducibility and comparative validity of a food frequency questionnaire for Australian adults*. Clin Nutr, 2014. **33**(1532-1983 (Electronic)): p. 906-14.
73. Baessler, K., et al., *Australian pelvic floor questionnaire: a validated interviewer-administered pelvic floor questionnaire for routine clinic and research*. International Urogynecology Journal, 2009. **20**(2): p. 149-158.
74. Bennett, P.J., et al., *Development and validation of a questionnaire designed to measure foot-health status*. Journal of the American Podiatric Medical Association, 1998. **88**(9): p. 419-428.
75. Bruwer, B., et al., *Psychometric properties of the Multidimensional Scale of Perceived Social Support in youth*. Comprehensive Psychiatry, 2008. **49**(2): p. 195-201.
76. Holmes, T.H. and R.H. Rahe, *The Social Readjustment Rating Scale*. J Psychosom Res, 1967. **11**(2): p. 213-8.
77. Cox, J.L., J.M. Holden, and R. Sagovsky, *Detection of postnatal depression. Development of the 10-item Edinburgh Postnatal Depression Scale*. Br J Psychiatry, 1987. **150**: p. 782-6.

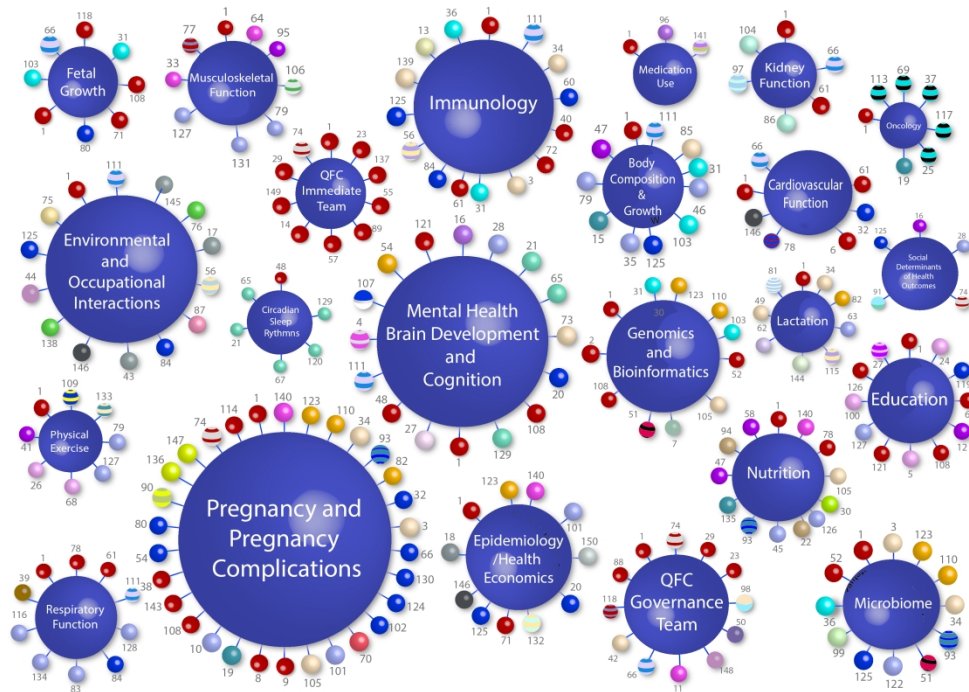

The QFC Research Collaborative. Each large sphere (navy blue) represents one of the 21 research themes that comprise the QFC research collaborative. Each number represents an individual researcher (149 researchers to date). Each small sphere represents the affiliation of that particular researcher (51 collaborating institutes/universities).

295x261mm (300 x 300 DPI)



**Supplementary Table 1:** Secondary Outcomes according to the 21 themes that make the QFC Research Collaborative. Research measures and samples used to address the secondary outcomes and the collaborations involved in addressing these questions. \*Collection measures planned for the future \$Age appropriate measures to be collected in the future.

| Theme                   | Major Research Question                                                                                                                                                                                                                                                                                                                                                                                                                                                                                          | Primary Exposure Measures Collected                                                                                                                                                                                                                                                                   |                                                                                                                                                                                                                                                                                               | Collaborations                                                                                                                                                                                                                     |
|-------------------------|------------------------------------------------------------------------------------------------------------------------------------------------------------------------------------------------------------------------------------------------------------------------------------------------------------------------------------------------------------------------------------------------------------------------------------------------------------------------------------------------------------------|-------------------------------------------------------------------------------------------------------------------------------------------------------------------------------------------------------------------------------------------------------------------------------------------------------|-----------------------------------------------------------------------------------------------------------------------------------------------------------------------------------------------------------------------------------------------------------------------------------------------|------------------------------------------------------------------------------------------------------------------------------------------------------------------------------------------------------------------------------------|
|                         |                                                                                                                                                                                                                                                                                                                                                                                                                                                                                                                  | Histories/Surveys/Questionnaires                                                                                                                                                                                                                                                                      | Measures/Biological Samples                                                                                                                                                                                                                                                                   |                                                                                                                                                                                                                                    |
| Cardiovascular function | <ul style="list-style-type: none"> <li>▶ Characterisation of the cardiovascular systems of our reproductive population and its relationship to fetal growth and child cardiovascular function</li> <li>▶ The relationship between maternal cardiovascular system and placental circulation and fetal cardiac output (fetal distress, tachycardia, congenital heart defects)</li> <li>▶ The relationship between maternal cardiovascular system and placental circulation and fetal kidney development</li> </ul> | <ul style="list-style-type: none"> <li>▶ Delivery Details</li> <li>▶ Demographics</li> <li>▶ Family History</li> <li>▶ Medical History</li> <li>▶ Medication and Lifestyle</li> <li>▶ Medication chart review for medication during labour and delivery</li> <li>▶ Pregnancy Complications</li> </ul> | <ul style="list-style-type: none"> <li>▶ Blood pressure</li> <li>▶ Cord blood</li> <li>▶ Heart rate</li> <li>▶ Height</li> <li>▶ Placenta and Placenta Measures</li> <li>▶ Skinfold thickness</li> <li>▶ Ultrasound data</li> <li>▶ Urine</li> <li>▶ Weight, BMI</li> <li>▶ PeaPod</li> </ul> | <ul style="list-style-type: none"> <li>▶ Fetal Growth</li> <li>▶ Kidney Function</li> <li>▶ Medication Usage</li> <li>▶ Neonatal/Child Body Composition and Growth</li> <li>▶ Pregnancy and Pregnancy and Complications</li> </ul> |
| Education               | <ul style="list-style-type: none"> <li>▶ What are the educational achievements of the parents and attitudes to linguistics?</li> <li>▶ How does maternal-baby interaction influence early oracy?</li> <li>▶ What is the impact of the parents' social and family networks on child literacy?</li> </ul>                                                                                                                                                                                                          | <ul style="list-style-type: none"> <li>▶ Childcare</li> <li>▶ Department of Education* and NAPLAN data linkage*</li> <li>▶ Education history</li> <li>▶ Pregnancy Complications</li> <li>▶ Reading for Enjoyment</li> <li>▶ Reading for Occupation</li> </ul>                                         | none                                                                                                                                                                                                                                                                                          | <ul style="list-style-type: none"> <li>▶ Epidemiology and Health Economics</li> <li>▶ Pregnancy and Pregnancy Complications</li> <li>▶ Social Determinants of Health Outcomes</li> </ul>                                           |

1  
2  
3  
4  
5  
6  
7  
8  
9  
10  
11  
12  
13  
14  
15  
16  
17  
18  
19  
20  
21  
22  
23  
24  
25  
26  
27  
28  
29  
30  
31  
32  
33  
34  
35  
36  
37  
38  
39  
40  
41  
42  
43  
44  
45  
46

|                                             |                                                                                                                                                                                                                                                                                                                                                                                                                                                      |                                                                                                                                                                                                                                                                                                                                                                                                                                                                                                                                                                                                                                                                        |                                                                                                                                                               |                                                                                                                                                                                                                                    |
|---------------------------------------------|------------------------------------------------------------------------------------------------------------------------------------------------------------------------------------------------------------------------------------------------------------------------------------------------------------------------------------------------------------------------------------------------------------------------------------------------------|------------------------------------------------------------------------------------------------------------------------------------------------------------------------------------------------------------------------------------------------------------------------------------------------------------------------------------------------------------------------------------------------------------------------------------------------------------------------------------------------------------------------------------------------------------------------------------------------------------------------------------------------------------------------|---------------------------------------------------------------------------------------------------------------------------------------------------------------|------------------------------------------------------------------------------------------------------------------------------------------------------------------------------------------------------------------------------------|
|                                             | <ul style="list-style-type: none"> <li>▶ Tracking the relationship between child health and academic achievement through data linkage</li> <li>▶ Impact of preterm delivery on linguistics, oracy and academic attainment</li> <li>▶ Impact of childcare on oracy and literacy</li> </ul>                                                                                                                                                            |                                                                                                                                                                                                                                                                                                                                                                                                                                                                                                                                                                                                                                                                        |                                                                                                                                                               |                                                                                                                                                                                                                                    |
| Environmental and Occupational Interactions | <ul style="list-style-type: none"> <li>▶ Examine impact of environmental exposures on microbiome</li> <li>▶ Are there similarities between the impact of environmental exposures on families in Australia relative to families in China?</li> <li>▶ What is the impact of air quality on pregnancy outcomes and respiratory health?</li> <li>▶ Gestational elemental exposures and its impact of pre and postnatal growth and development</li> </ul> | <ul style="list-style-type: none"> <li>▶ Adult Sleep Patterns</li> <li>▶ Alcohol Consumption</li> <li>▶ Australian Eating Survey</li> <li>▶ Food Frequency</li> <li>▶ Breastfeeding Questionnaires</li> <li>▶ Delivery Details</li> <li>▶ Demographics</li> <li>▶ Depression Anxiety Stress Scale</li> <li>▶ Education History</li> <li>▶ Employment History</li> <li>▶ Indoor/Outdoor air sample</li> <li>▶ Medical History</li> <li>▶ Medication and Lifestyle</li> <li>▶ Medication chart review for medication during labour and delivery</li> <li>▶ Postcode / Geocode</li> <li>▶ Pregnancy Complications</li> <li>▶ Residential Housing Questionnaire</li> </ul> | <ul style="list-style-type: none"> <li>▶ Baby Measures</li> <li>▶ Blood</li> <li>▶ Breast milk</li> <li>▶ Hair</li> <li>▶ Toenail</li> <li>▶ Urine</li> </ul> | <ul style="list-style-type: none"> <li>▶ Immunology</li> <li>▶ Lactation</li> <li>▶ Medication Usage</li> <li>▶ Microbiome</li> <li>▶ Nutrition</li> <li>▶ Pregnancy and Pregnancy Complications</li> <li>▶ Respiratory</li> </ul> |

|                                   |                                                                                                                                                                                                                                                                                                                                                                                                                                                                                  |                                                                                                                                                                                                                                                                                                                                                                                                         |                                                                                                                                                                                                                                                   |                                                                                                                                                                                                                                                 |
|-----------------------------------|----------------------------------------------------------------------------------------------------------------------------------------------------------------------------------------------------------------------------------------------------------------------------------------------------------------------------------------------------------------------------------------------------------------------------------------------------------------------------------|---------------------------------------------------------------------------------------------------------------------------------------------------------------------------------------------------------------------------------------------------------------------------------------------------------------------------------------------------------------------------------------------------------|---------------------------------------------------------------------------------------------------------------------------------------------------------------------------------------------------------------------------------------------------|-------------------------------------------------------------------------------------------------------------------------------------------------------------------------------------------------------------------------------------------------|
|                                   |                                                                                                                                                                                                                                                                                                                                                                                                                                                                                  | ▶ Smoking Status Assessment of Quality of Life questionnaire                                                                                                                                                                                                                                                                                                                                            |                                                                                                                                                                                                                                                   |                                                                                                                                                                                                                                                 |
| Epidemiology and Health Economics | <ul style="list-style-type: none"> <li>▶ How does health utility change throughout pregnancy and post-partum?</li> <li>▶ Is there inequality of opportunity in parental mental health outcomes and use of mental health and other health services?</li> <li>▶ What are the payment mechanisms for health services for parents? Does travel impede their use of services?</li> <li>▶ Does alcohol and substance abuse change health care utilisation during pregnancy?</li> </ul> | <ul style="list-style-type: none"> <li>▶ Alcohol Consumption</li> <li>▶ Cultural background</li> <li>▶ Demographics</li> <li>▶ Education history</li> <li>▶ Employment history</li> <li>▶ European Quality of Life 5-Dimension</li> <li>▶ Medical History</li> <li>▶ Medication Treatment*</li> <li>▶ PBS/MBS data linkage*</li> <li>▶ Postcode / Geocode</li> <li>▶ Pregnancy Complications</li> </ul> | none                                                                                                                                                                                                                                              | <ul style="list-style-type: none"> <li>▶ Education</li> <li>▶ Medication Usage</li> <li>▶ Mental Health and Cognitive Development</li> <li>▶ Pregnancy and Pregnancy Complications</li> <li>▶ Social Determinants of Health Outcomes</li> </ul> |
| Fetal growth                      | <ul style="list-style-type: none"> <li>▶ Characterise the variables contributing to idiopathic growth restriction and large for gestational age</li> <li>▶ How does fetal growth influence other early life characteristics (education, physical and mental health, social behaviour)</li> </ul>                                                                                                                                                                                 | <ul style="list-style-type: none"> <li>▶ Delivery Details</li> <li>▶ Department of Education* and NAPLAN data linkage*</li> <li>▶ Medical History</li> <li>▶ Pregnancy Complications</li> </ul>                                                                                                                                                                                                         | <ul style="list-style-type: none"> <li>▶ Baby Measures</li> <li>▶ Cord blood</li> <li>▶ Middle Cerebral Artery Doppler/Placental Artery Doppler</li> <li>▶ Peapod</li> <li>▶ Placenta and Placenta measures</li> <li>▶ Ultrasound data</li> </ul> | <ul style="list-style-type: none"> <li>▶ Education</li> <li>▶ Neonatal/Child Body Composition and Growth</li> <li>▶ Pregnancy and Pregnancy Complications</li> </ul>                                                                            |
| Genomics and Bioinformatics       | <ul style="list-style-type: none"> <li>▶ The relationship between the genome, complex traits and disease, mental health, maternal</li> </ul>                                                                                                                                                                                                                                                                                                                                     | <ul style="list-style-type: none"> <li>▶ Medical History</li> <li>▶ Family History</li> <li>▶ Demographics</li> </ul>                                                                                                                                                                                                                                                                                   | <ul style="list-style-type: none"> <li>▶ Blood</li> <li>▶ Cheek swab</li> <li>▶ Cord blood</li> </ul>                                                                                                                                             | <ul style="list-style-type: none"> <li>▶ Mental Health and Cognitive Development</li> </ul>                                                                                                                                                     |

1  
2  
3  
4  
5  
6  
7  
8  
9  
10  
11  
12  
13  
14  
15  
16  
17  
18  
19  
20  
21  
22  
23  
24  
25  
26  
27  
28  
29  
30  
31  
32  
33  
34  
35  
36  
37  
38  
39  
40  
41  
42  
43  
44  
45  
46

|                 |                                                                                                                                                                                                                                                                                                                                                                                                                                                                                                                                                 |                                                                                                                                                                                                                                                                                                    |                                                                                                                                                                                     |                                                                                                                                                                    |
|-----------------|-------------------------------------------------------------------------------------------------------------------------------------------------------------------------------------------------------------------------------------------------------------------------------------------------------------------------------------------------------------------------------------------------------------------------------------------------------------------------------------------------------------------------------------------------|----------------------------------------------------------------------------------------------------------------------------------------------------------------------------------------------------------------------------------------------------------------------------------------------------|-------------------------------------------------------------------------------------------------------------------------------------------------------------------------------------|--------------------------------------------------------------------------------------------------------------------------------------------------------------------|
|                 | <ul style="list-style-type: none"> <li>and fetal health, pregnancy outcomes, and development</li> <li>▶ The impact of the mitochondrial genome on pregnancy outcomes</li> <li>▶ The interaction of the genome with the microbiome</li> <li>▶ The role of and prevalence of somatic and de novo genomic variation</li> <li>▶ Twin studies</li> </ul>                                                                                                                                                                                             | <ul style="list-style-type: none"> <li>▶ Pregnancy Complications</li> </ul>                                                                                                                                                                                                                        | <ul style="list-style-type: none"> <li>▶ Heel prick</li> <li>▶ Microba swab</li> <li>▶ Placenta: dimensions, samples</li> <li>▶ Stool</li> </ul>                                    | <ul style="list-style-type: none"> <li>▶ Microbiome</li> <li>▶ Pregnancy and Pregnancy Complications</li> </ul>                                                    |
| Immunology      | <ul style="list-style-type: none"> <li>▶ The in utero and early life contributions to childhood allergy, autoimmunity and disease development</li> <li>▶ The influence of the maternal microbiome on childhood allergy, autoimmunity susceptibility and disease development</li> <li>▶ The impact of maternal and childhood infection on child health and development</li> <li>▶ The relationship between child microbiome and disease</li> <li>▶ How extrinsic and intrinsic factors influence the development of the immune system</li> </ul> | <ul style="list-style-type: none"> <li>▶ Asthma control questionnaire</li> <li>▶ Sino-Nasal Outcome test</li> <li>▶ Medical History</li> <li>▶ Medication and Lifestyle</li> <li>▶ Medication chart review for medication during labour and delivery</li> <li>▶ Pregnancy Complications</li> </ul> | <ul style="list-style-type: none"> <li>▶ Blood</li> <li>▶ Cord blood</li> <li>▶ Microba swab</li> <li>▶ Saliva</li> <li>▶ Stool</li> <li>▶ Urine</li> <li>▶ Vaginal swab</li> </ul> | <ul style="list-style-type: none"> <li>▶ Medication Usage</li> <li>▶ Microbiome</li> <li>▶ Pregnancy and Pregnancy complications</li> <li>▶ Respiratory</li> </ul> |
| Kidney Function | <ul style="list-style-type: none"> <li>▶ What genetics factors contribute to kidney disease and kidney disease risk? Can these</li> </ul>                                                                                                                                                                                                                                                                                                                                                                                                       | <ul style="list-style-type: none"> <li>▶ Alcohol Consumption</li> <li>▶ Australian Eating Survey Food Frequency</li> <li>▶ Delivery Details</li> </ul>                                                                                                                                             | <ul style="list-style-type: none"> <li>▶ Baby Measures</li> <li>▶ Blood</li> <li>▶ Blood Pressure</li> <li>▶ Height</li> </ul>                                                      | <ul style="list-style-type: none"> <li>▶ Cardiovascular Function</li> <li>▶ Fetal Growth</li> <li>▶ Medication Usage</li> </ul>                                    |

|                  |                                                                                                                                                                                                                                                                                                                                                                                                                                                               |                                                                                                                                                                                                                                                                                                                                                                                         |                                                                                                                                                                                                                                                                             |                                                                                                                                                                                         |
|------------------|---------------------------------------------------------------------------------------------------------------------------------------------------------------------------------------------------------------------------------------------------------------------------------------------------------------------------------------------------------------------------------------------------------------------------------------------------------------|-----------------------------------------------------------------------------------------------------------------------------------------------------------------------------------------------------------------------------------------------------------------------------------------------------------------------------------------------------------------------------------------|-----------------------------------------------------------------------------------------------------------------------------------------------------------------------------------------------------------------------------------------------------------------------------|-----------------------------------------------------------------------------------------------------------------------------------------------------------------------------------------|
|                  | <p>mutations be reversed to prevent kidney disease?</p> <ul style="list-style-type: none"> <li>▶ What pregnancy related events compromise fetal kidney development?</li> <li>▶ How does prematurity affect kidney development?</li> <li>▶ What are the population-based characteristics of kidney function?</li> <li>▶ Determinant of infant kidney size and function</li> </ul>                                                                              | <ul style="list-style-type: none"> <li>▶ Demographics</li> <li>▶ Medical History</li> <li>▶ Medication and Lifestyle</li> <li>▶ Medication chart review for medication during labour and delivery</li> <li>▶ Pregnancy Complications</li> </ul>                                                                                                                                         | <ul style="list-style-type: none"> <li>▶ PeaPod</li> <li>▶ Ultrasound data</li> <li>▶ Urine</li> <li>▶ Weigh, BMI</li> </ul>                                                                                                                                                | <ul style="list-style-type: none"> <li>▶ Neonatal/Child Body Composition and Growth</li> <li>▶ Nutrition</li> <li>▶ Pregnancy and Pregnancy Complications</li> </ul>                    |
| Lactation        | <ul style="list-style-type: none"> <li>▶ Characterisation of breastfeeding habits in current population and parents views on breastfeeding</li> <li>▶ Identification of factors that inhibit breastfeeding in first 6 weeks postpartum</li> <li>▶ Identifying the impact of mastitis on breastfeeding continuation</li> <li>▶ Determining the impact of BMI on breastfeeding continuation</li> <li>▶ Impact of tongue tie on breastfeeding success</li> </ul> | <ul style="list-style-type: none"> <li>▶ Alcohol Consumption</li> <li>▶ Australian Eating Survey Food Frequency</li> <li>▶ Baby Nutrition</li> <li>▶ Breastfeeding questionnaires</li> <li>▶ Delivery Details</li> <li>▶ Demographics</li> <li>▶ Intention to breastfeed</li> <li>▶ Pregnancy Complications</li> <li>▶ Skin-skin contact</li> <li>▶ Time to first breastfeed</li> </ul> | <ul style="list-style-type: none"> <li>▶ Baby Measures</li> <li>▶ Breast milk</li> <li>▶ Colostrum</li> <li>▶ Height</li> <li>▶ Photographs of mouth and tongue</li> <li>▶ Skin swab</li> <li>▶ Vaginal swab</li> <li>▶ Videos of feeding</li> <li>▶ Weight, BMI</li> </ul> | <ul style="list-style-type: none"> <li>▶ Microbiome</li> <li>▶ Nutrition</li> <li>▶ Pregnancy and Pregnancy Complications</li> <li>▶ Social Determinants and Health Outcomes</li> </ul> |
| Medication Usage | <ul style="list-style-type: none"> <li>▶ To evaluate medication (prescription and non-prescription) usage patterns in mothers, partners and their children.</li> </ul>                                                                                                                                                                                                                                                                                        | <ul style="list-style-type: none"> <li>▶ Delivery Details</li> <li>▶ Demographics</li> <li>▶ Medication and Lifestyle</li> <li>▶ Medication chart review for medication during labour and delivery</li> </ul>                                                                                                                                                                           | <ul style="list-style-type: none"> <li>▶ Baby Measures</li> </ul>                                                                                                                                                                                                           | <ul style="list-style-type: none"> <li>▶ Immunology</li> <li>▶ Mental Health and Cognitive Development</li> </ul>                                                                       |

1  
2  
3  
4  
5  
6  
7  
8  
9  
10  
11  
12  
13  
14  
15  
16  
17  
18  
19  
20  
21  
22  
23  
24  
25  
26  
27  
28  
29  
30  
31  
32  
33  
34  
35  
36  
37  
38  
39  
40  
41  
42  
43  
44  
45  
46

|                                                       |                                                                                                                                                                                                                                                                                                                                                                                                                                      |                                                                                                                                                                                                                                                                                                                                                                                                                                                                                                                                                                                                                                                                                                                                                                  |                                                                                                                                               |                                                                                                                                                                                                                                                    |
|-------------------------------------------------------|--------------------------------------------------------------------------------------------------------------------------------------------------------------------------------------------------------------------------------------------------------------------------------------------------------------------------------------------------------------------------------------------------------------------------------------|------------------------------------------------------------------------------------------------------------------------------------------------------------------------------------------------------------------------------------------------------------------------------------------------------------------------------------------------------------------------------------------------------------------------------------------------------------------------------------------------------------------------------------------------------------------------------------------------------------------------------------------------------------------------------------------------------------------------------------------------------------------|-----------------------------------------------------------------------------------------------------------------------------------------------|----------------------------------------------------------------------------------------------------------------------------------------------------------------------------------------------------------------------------------------------------|
|                                                       | <ul style="list-style-type: none"> <li>▶ To assess health outcomes (beneficial or adverse) and wellbeing of mothers, partners and their children in relation to medication use</li> </ul>                                                                                                                                                                                                                                            | <ul style="list-style-type: none"> <li>▶ Medication Treatment*</li> <li>▶ Pregnancy Complications</li> </ul>                                                                                                                                                                                                                                                                                                                                                                                                                                                                                                                                                                                                                                                     |                                                                                                                                               | <ul style="list-style-type: none"> <li>▶ Pregnancy and Pregnancy Complications</li> </ul>                                                                                                                                                          |
| <p>Mental Health, Brain Development and Cognition</p> | <ul style="list-style-type: none"> <li>▶ The relationship between maternal mental health and wellbeing and its impact on pregnancy and child neurodevelopmental outcomes</li> <li>▶ The relationship between mental health status of partners and its impact on maternal mental health and wellbeing, pregnancy outcomes and child development</li> <li>▶ Interaction and dependencies between mental and physical health</li> </ul> | <ul style="list-style-type: none"> <li>▶ Assessment of Quality of Life questionnaire</li> <li>▶ Bayley Scales of Infant and Toddler Development*</li> <li>▶ Child Behaviour and Neurodevelopment*\$</li> <li>▶ Couple Satisfaction Index</li> <li>▶ Depression Anxiety Stress Scale</li> <li>▶ Edinburgh Post-natal Depression Scale</li> <li>▶ European Quality of Life 5-Dimension</li> <li>▶ Medical History</li> <li>▶ Medication and Lifestyle</li> <li>▶ Medication chart review for medication during labour and delivery</li> <li>▶ Medication Treatment*</li> <li>▶ Multidimensional Scale of Perceived Social Support</li> <li>▶ DSM-5 Self-Rated Level 1 Cross-Cutting Symptom Measure - Adult</li> <li>▶ Social Readjustment Rating Scale</li> </ul> | <ul style="list-style-type: none"> <li>▶ Blood</li> <li>▶ Cheek swab</li> <li>▶ Cord blood</li> <li>▶ Urine</li> <li>▶ Weight, BMI</li> </ul> | <ul style="list-style-type: none"> <li>▶ Fetal Growth</li> <li>▶ Immunology</li> <li>▶ Medication Usage</li> <li>▶ Physical Exercise</li> <li>▶ Pregnancy and Pregnancy Complications</li> <li>▶ Social Determinants of Health Outcomes</li> </ul> |

|    |            |                                     |                                |                     |
|----|------------|-------------------------------------|--------------------------------|---------------------|
| 1  |            |                                     |                                |                     |
| 2  |            |                                     |                                |                     |
| 3  | Microbiome | ▶ To examine the interaction        | ▶ Bristol stool chart          | ▶ Cheek swab        |
| 4  |            | ▶ between mother, father and        | ▶ Constipation score           | ▶ Cord blood        |
| 5  |            | ▶ baby microbiome (normal           | ▶ Demographics                 | ▶ Microba swab      |
| 6  |            | ▶ microbiome)                       | ▶ Family History               | ▶ Placenta and      |
| 7  |            |                                     | ▶ Hyperemesis Questions        | ▶ Placenta Measures |
| 8  |            | ▶ To examine the impact of          | ▶ Medical History              | ▶ Skin swab         |
| 9  |            | ▶ pregnancy and pregnancy           | ▶ Medication and Lifestyle     | ▶ Stool             |
| 10 |            | ▶ complications on maternal and     | ▶ Medication chart review for  | ▶ Urine             |
| 11 |            | ▶ neonatal microbiome (infection,   | ▶ medication during labour and | ▶ Vaginal swab      |
| 12 |            | ▶ preterm birth, pre-eclampsia,     | ▶ delivery                     |                     |
| 13 |            | ▶ hyperemesis gravidarum)           | ▶ Pregnancy Complications      |                     |
| 14 |            | ▶ To examine the role of nutrition, |                                |                     |
| 15 |            | ▶ feeding and supplement usage      |                                |                     |
| 16 |            | ▶ in microbiome development and     |                                |                     |
| 17 |            | ▶ stability (method of feeding,     |                                |                     |
| 18 |            | ▶ vitamin/mineral                   |                                |                     |
| 19 |            | ▶ supplementation)                  |                                |                     |
| 20 |            | ▶ To examine the impact of          |                                |                     |
| 21 |            | ▶ medical interventions pre- and    |                                |                     |
| 22 |            | ▶ post-conception on the            |                                |                     |
| 23 |            | ▶ microbiome (IVF, medications)     |                                |                     |
| 24 |            | ▶ The characteristics of the        |                                |                     |
| 25 |            | ▶ vaginal microbiome in             |                                |                     |
| 26 |            | ▶ complicated pregnancies           |                                |                     |
| 27 |            |                                     |                                |                     |
| 28 |            |                                     |                                |                     |
| 29 |            |                                     |                                |                     |
| 30 |            |                                     |                                |                     |
| 31 |            |                                     |                                |                     |
| 32 |            |                                     |                                |                     |
| 33 |            |                                     |                                |                     |
| 34 |            |                                     |                                |                     |
| 35 |            |                                     |                                |                     |
| 36 |            |                                     |                                |                     |
| 37 |            |                                     |                                |                     |
| 38 |            |                                     |                                |                     |
| 39 |            |                                     |                                |                     |
| 40 |            |                                     |                                |                     |
| 41 |            |                                     |                                |                     |
| 42 |            |                                     |                                |                     |
| 43 |            |                                     |                                |                     |
| 44 |            |                                     |                                |                     |
| 45 |            |                                     |                                |                     |
| 46 |            |                                     |                                |                     |

1  
2  
3  
4  
5  
6  
7  
8  
9  
10  
11  
12  
13  
14  
15  
16  
17  
18  
19  
20  
21  
22  
23  
24  
25  
26  
27  
28  
29  
30  
31  
32  
33  
34  
35  
36  
37  
38  
39  
40  
41  
42  
43  
44  
45  
46

|                                            |                                                                                                                                                                                                                                                                                                                                                                                                                                                                               |                                                                                                                                                                                                                                                                                                                                                                                                                                |                                                                                                                                                                                                                                            |                                                                                                                                                                                                                                            |
|--------------------------------------------|-------------------------------------------------------------------------------------------------------------------------------------------------------------------------------------------------------------------------------------------------------------------------------------------------------------------------------------------------------------------------------------------------------------------------------------------------------------------------------|--------------------------------------------------------------------------------------------------------------------------------------------------------------------------------------------------------------------------------------------------------------------------------------------------------------------------------------------------------------------------------------------------------------------------------|--------------------------------------------------------------------------------------------------------------------------------------------------------------------------------------------------------------------------------------------|--------------------------------------------------------------------------------------------------------------------------------------------------------------------------------------------------------------------------------------------|
| Musculoskeletal function                   | <ul style="list-style-type: none"> <li>▶ Is obstructive defaecation associated with mode of delivery during childbirth?</li> <li>▶ What is the prevalence, severity and impact of foot pain during pregnancy and postpartum and is predictive of peri-or post-natal prolapse?</li> <li>▶ Is physical activity in the ante- and post-natal period related to the prevalence of Pregnancy-related Low back pain, pelvic girdle pain and Stress Urinary Incontinence?</li> </ul> | <ul style="list-style-type: none"> <li>▶ Adult Sleep Patterns</li> <li>▶ Bristol stool chart</li> <li>▶ Constipation score</li> <li>▶ Demographics</li> <li>▶ Employment History</li> <li>▶ Medical History</li> <li>▶ Musculoskeletal function</li> <li>▶ Physical Activity</li> <li>▶ Pregnancy Complications</li> <li>▶ Pregnancy History</li> <li>▶ Residential Housing Questionnaire</li> <li>▶ Smoking Status</li> </ul> | <ul style="list-style-type: none"> <li>▶ Height</li> <li>▶ Weight, BMI</li> <li>▶ Blood</li> </ul>                                                                                                                                         | <ul style="list-style-type: none"> <li>▶ Pregnancy and Pregnancy Complications</li> <li>▶ Physical Exercise</li> </ul>                                                                                                                     |
| Neonatal/Child Body Composition and Growth | <ul style="list-style-type: none"> <li>▶ Is infant body composition related to later health and disease?</li> <li>▶ Characterisation of body composition from in utero to early life</li> <li>▶ Genetic factors that contribute to obesity in childhood</li> <li>▶ Impact of preterm delivery on body composition</li> <li>▶ What is the contribution of early life nutrient to body composition over time</li> </ul>                                                         | <ul style="list-style-type: none"> <li>▶ Baby Nutrition*</li> <li>▶ Breastfeeding questionnaires</li> <li>▶ Demographics</li> <li>▶ Feeding your baby</li> <li>▶ Medical History</li> <li>▶ Medication and Lifestyle</li> <li>▶ Pregnancy Complications</li> <li>▶ PBS/MBS data linkage*</li> </ul>                                                                                                                            | <ul style="list-style-type: none"> <li>▶ Baby measures</li> <li>▶ Cheek swab</li> <li>▶ Cord blood</li> <li>▶ Guthrie Heel Prick</li> <li>▶ NICU body measures for preterm infants</li> <li>▶ PeaPod</li> <li>▶ Ultrasound data</li> </ul> | <ul style="list-style-type: none"> <li>▶ Cardiovascular Function</li> <li>▶ Fetal Growth</li> <li>▶ Genomics and Bioinformatics</li> <li>▶ Medicine Usage</li> <li>▶ Nutrition</li> <li>▶ Pregnancy and Pregnancy Complications</li> </ul> |
| Nutrition                                  | <ul style="list-style-type: none"> <li>▶ How does maternal dietary intake, micronutrient supplement intake, and gestational weight gain change</li> </ul>                                                                                                                                                                                                                                                                                                                     | <ul style="list-style-type: none"> <li>▶ Alcohol consumption</li> <li>▶ Australian Eating Survey Food Frequency</li> <li>▶ Breastfeeding Questionnaires</li> </ul>                                                                                                                                                                                                                                                             | <ul style="list-style-type: none"> <li>▶ Baby measures</li> <li>▶ Bioimpedance</li> <li>▶ Blood</li> <li>▶ Height</li> </ul>                                                                                                               | <ul style="list-style-type: none"> <li>▶ Education</li> <li>▶ Medication Usage</li> </ul>                                                                                                                                                  |



1  
2  
3  
4  
5  
6  
7  
8  
9  
10  
11  
12  
13  
14  
15  
16  
17  
18  
19  
20  
21  
22  
23  
24  
25  
26  
27  
28  
29  
30  
31  
32  
33  
34  
35  
36  
37  
38  
39  
40  
41  
42  
43  
44  
45  
46

|          |                                                                                                                                                                                                                                                                                                                                                                                                                                                                                                                                                                                                                                                                                                                                                   |                                                                                                                           |                                                                                                                            |                                                                                                                                                      |
|----------|---------------------------------------------------------------------------------------------------------------------------------------------------------------------------------------------------------------------------------------------------------------------------------------------------------------------------------------------------------------------------------------------------------------------------------------------------------------------------------------------------------------------------------------------------------------------------------------------------------------------------------------------------------------------------------------------------------------------------------------------------|---------------------------------------------------------------------------------------------------------------------------|----------------------------------------------------------------------------------------------------------------------------|------------------------------------------------------------------------------------------------------------------------------------------------------|
|          | during pregnancy and the early postpartum period, and how does this compare with guidelines?<br>▶ What is the relationship between dietary intake and gestational weight gain across pregnancy?<br>▶ What is the relationship between maternal and paternal characteristics and (i) dietary and (ii) gestational weight gain guideline attainment?<br>▶ What maternal characteristics mediate the relationship between dietary intake/micronutrient supplement intake and nutrient status during pregnancy and the early postpartum period, and how does this affect birth outcomes?<br>▶ What is the relationship between maternal dietary intake/micronutrient supplementation and her gut microbiome, and how does this affect birth outcomes? | ▶ Delivery Details<br>▶ Demographics<br>▶ Medical History<br>▶ Medication and Lifestyle<br>▶ Pregnancy Complications      | ▶ Skin fold thickness<br>▶ Waist circumference<br>▶ Weight, BMI<br>▶ Placenta and Placenta Measures<br>▶ Stool<br>▶ PeaPod | ▶ Mental Health and Cognitive Development<br>▶ Microbiome<br>▶ Neonatal/Child Body Composition and Growth<br>▶ Pregnancy and Pregnancy Complications |
| Oncology | ▶ Pregnancy and melanoma risk<br>▶ Breast cancer and breastfeeding<br>▶ Origins of childhood cancer<br>▶ Lifestyle factors and risk of cancer                                                                                                                                                                                                                                                                                                                                                                                                                                                                                                                                                                                                     | ▶ Alcohol consumption<br>▶ Australian Eating Survey Food Frequency<br>▶ Baby Nutrition*<br>▶ Breastfeeding Questionnaires | ▶ Breastmilk<br>▶ Blood<br>▶ Placenta<br>▶ Saliva                                                                          | ▶ Genomics and Bioinformatics<br>▶ Lactation<br>▶ Medication Usage<br>▶ Nutrition                                                                    |

1  
2  
3  
4  
5  
6  
7  
8  
9  
10  
11  
12  
13  
14  
15  
16  
17  
18  
19  
20  
21  
22  
23  
24  
25  
26  
27  
28  
29  
30  
31  
32  
33  
34  
35  
36  
37  
38  
39  
40  
41  
42  
43  
44  
45  
46

|                                       |                                                                                                                                                                                                                                                                                                                                                                                                                                                                             |                                                                                                                                                                                                                                                                                                                                                                                    |                                                                                                                                                                                                                                   |                                                                                                                                                                                                                                                                       |
|---------------------------------------|-----------------------------------------------------------------------------------------------------------------------------------------------------------------------------------------------------------------------------------------------------------------------------------------------------------------------------------------------------------------------------------------------------------------------------------------------------------------------------|------------------------------------------------------------------------------------------------------------------------------------------------------------------------------------------------------------------------------------------------------------------------------------------------------------------------------------------------------------------------------------|-----------------------------------------------------------------------------------------------------------------------------------------------------------------------------------------------------------------------------------|-----------------------------------------------------------------------------------------------------------------------------------------------------------------------------------------------------------------------------------------------------------------------|
|                                       | <ul style="list-style-type: none"> <li>▶ Ovarian cancer and pregnancy</li> <li>▶ Identification of risk factors for melanoma during pregnancy and beyond</li> </ul>                                                                                                                                                                                                                                                                                                         | <ul style="list-style-type: none"> <li>▶ Demographics</li> <li>▶ Exposure Measurements (Water, Sun, Chemicals, Pesticides)*</li> <li>▶ Family History</li> <li>▶ Malignant melanoma risk</li> <li>▶ Medical History</li> <li>▶ Medical Scans (x-ray, PET, CAT)*</li> <li>▶ Medication and Lifestyle</li> <li>▶ Medication Treatment*</li> <li>▶ Pregnancy Complications</li> </ul> |                                                                                                                                                                                                                                   | <ul style="list-style-type: none"> <li>▶ Pregnancy and Pregnancy Complications</li> </ul>                                                                                                                                                                             |
| Physical Exercise                     | <ul style="list-style-type: none"> <li>▶ Activity changes with pregnancy</li> <li>▶ The effect of exercise during pregnancy on domains of early childhood development</li> <li>▶ How does activity in Australian women now compare to the Australian women’s longitudinal study data of aged matched women from the 1990s</li> <li>▶ The role of movement across the day on maternal mental health</li> <li>▶ Effect on physical activity on placental thickness</li> </ul> | <ul style="list-style-type: none"> <li>▶ Alcohol Consumption</li> <li>▶ Australian Eating Survey Food Frequency</li> <li>▶ Demographics</li> <li>▶ Family History</li> <li>▶ Medical History</li> <li>▶ Medication and Lifestyle</li> <li>▶ Physical Activity</li> <li>▶ Smoking Status</li> </ul>                                                                                 | <ul style="list-style-type: none"> <li>▶ Baby Measures</li> <li>▶ Blood</li> <li>▶ Cord blood</li> <li>▶ Height</li> <li>▶ Placenta</li> <li>▶ Placenta and Placenta Measures</li> <li>▶ Saliva</li> <li>▶ Weight, BMI</li> </ul> | <ul style="list-style-type: none"> <li>▶ Education</li> <li>▶ Medication Usage</li> <li>▶ Mental Health and Cognitive Development</li> <li>▶ Nutrition</li> <li>▶ Pregnancy and Pregnancy Complications</li> <li>▶ Social Determinants and Health Outcomes</li> </ul> |
| Pregnancy and Pregnancy Complications | <ul style="list-style-type: none"> <li>▶ What are the pregnancy related risk factors, placenta function and outcomes associated with PE, PTD, GD, IUGR?</li> </ul>                                                                                                                                                                                                                                                                                                          | <ul style="list-style-type: none"> <li>▶ Alcohol Consumption</li> <li>▶ Asthma Control Questionnaire</li> <li>▶ Australian Eating Survey Food Frequency</li> </ul>                                                                                                                                                                                                                 | <ul style="list-style-type: none"> <li>▶ Baby Measures</li> <li>▶ Blood</li> <li>▶ Cheek swab</li> <li>▶ Cord Blood</li> <li>▶ Guthrie blood spot</li> </ul>                                                                      | <ul style="list-style-type: none"> <li>▶ Fetal Growth</li> <li>▶ Genomics and Bioinformatics</li> <li>▶ Microbiome</li> </ul>                                                                                                                                         |

|                             |                                                                                                                                                                                                                                                                                                                                                                                                                                                   |                                                                                                                                                                                                                                                                                                                                                                                                                                 |                                                                                                                                       |                                                                                                                                              |
|-----------------------------|---------------------------------------------------------------------------------------------------------------------------------------------------------------------------------------------------------------------------------------------------------------------------------------------------------------------------------------------------------------------------------------------------------------------------------------------------|---------------------------------------------------------------------------------------------------------------------------------------------------------------------------------------------------------------------------------------------------------------------------------------------------------------------------------------------------------------------------------------------------------------------------------|---------------------------------------------------------------------------------------------------------------------------------------|----------------------------------------------------------------------------------------------------------------------------------------------|
|                             | <ul style="list-style-type: none"> <li>▶ Placental micronutrient environment and its relationship to maternal nutrition</li> <li>▶ The impact of endocrine disruptors on thyroid function and placental TSH pathways</li> <li>▶ Link between genetics and pregnancy complications</li> <li>▶ Placental iron transfer and iron bioavailability in infants of asthmatic mothers</li> <li>▶ The role of eicosanoids in mid-late gestation</li> </ul> | <ul style="list-style-type: none"> <li>▶ Delivery Details</li> <li>▶ Demographics</li> <li>▶ Family History</li> <li>▶ Hyperemesis questions</li> <li>▶ Medical History</li> <li>▶ Pregnancy Complications</li> </ul>                                                                                                                                                                                                           | <ul style="list-style-type: none"> <li>▶ Placenta and Placenta Measures</li> <li>▶ Ultrasound Data</li> <li>▶ Vaginal swab</li> </ul> | <ul style="list-style-type: none"> <li>▶ Neonatal/Child Body Composition</li> <li>▶ Nutrition</li> </ul>                                     |
| Respiratory                 | <ul style="list-style-type: none"> <li>▶ What is the prevalence of asthma in the reproductive age population?</li> <li>▶ Does maternal asthma worsen with pregnancy and is it related to environmental pollutants?</li> <li>▶ What pregnancy related variables influence the development of asthma in childhood?</li> <li>▶ How does rhinitis in pregnancy influence neonatal outcome?</li> </ul>                                                 | <ul style="list-style-type: none"> <li>▶ Alcohol Consumption</li> <li>▶ Asthma Control Questionnaire</li> <li>▶ Delivery Details</li> <li>▶ Demographics</li> <li>▶ Exacerbation Questionnaire</li> <li>▶ Family History</li> <li>▶ Medical History</li> <li>▶ Medication and Lifestyle</li> <li>▶ Physical Activity</li> <li>▶ Pregnancy Complications</li> <li>▶ Sino-nasal Outcome Test</li> <li>▶ Smoking Status</li> </ul> | <ul style="list-style-type: none"> <li>▶ Blood</li> <li>▶ Height</li> <li>▶ Photographs of Rash</li> <li>▶ Weight, BMI</li> </ul>     | <ul style="list-style-type: none"> <li>▶ Immunology</li> <li>▶ Medication Usage</li> <li>▶ Pregnancy and Pregnancy Complications</li> </ul>  |
| Sleep and Circadian Rhythms | <ul style="list-style-type: none"> <li>▶ Impact of parental sleep and stress on parental physical, social and mental health</li> <li>▶ Impact of pregnancy on sleep patterns and sleep disturbance</li> </ul>                                                                                                                                                                                                                                     | <ul style="list-style-type: none"> <li>▶ Adult Sleep Patterns</li> <li>▶ Australian Eating Survey Food Frequency</li> <li>▶ Couple Satisfaction Index</li> <li>▶ Delivery Details</li> <li>▶ Demographics</li> </ul>                                                                                                                                                                                                            | <ul style="list-style-type: none"> <li>▶ Baby Measures</li> <li>▶ Height</li> <li>▶ Weight, BMI</li> <li>▶ Bioimpedance</li> </ul>    | <ul style="list-style-type: none"> <li>▶ Education</li> <li>▶ Mental Health and Cognitive Development</li> <li>▶ Medication Usage</li> </ul> |

1  
2  
3  
4  
5  
6  
7  
8  
9  
10  
11  
12  
13  
14  
15  
16  
17  
18  
19  
20  
21  
22  
23  
24  
25  
26  
27  
28  
29  
30  
31  
32  
33  
34  
35  
36  
37  
38  
39  
40  
41  
42  
43  
44  
45  
46

1  
2  
3  
4  
5  
6  
7  
8  
9  
10  
11  
12  
13  
14  
15  
16  
17  
18  
19  
20  
21  
22  
23  
24  
25  
26  
27  
28  
29  
30  
31  
32  
33  
34  
35  
36  
37  
38  
39  
40  
41  
42  
43  
44  
45  
46

|                                        |                                                                                                                                                                                                                                                                                                                                                                                                                                                         |                                                                                                                                                                                                                                                                                                                                                                                                                                                                                                                                       |                                                                                                             |                                                                                                                                                                                                                                                         |
|----------------------------------------|---------------------------------------------------------------------------------------------------------------------------------------------------------------------------------------------------------------------------------------------------------------------------------------------------------------------------------------------------------------------------------------------------------------------------------------------------------|---------------------------------------------------------------------------------------------------------------------------------------------------------------------------------------------------------------------------------------------------------------------------------------------------------------------------------------------------------------------------------------------------------------------------------------------------------------------------------------------------------------------------------------|-------------------------------------------------------------------------------------------------------------|---------------------------------------------------------------------------------------------------------------------------------------------------------------------------------------------------------------------------------------------------------|
|                                        | <ul style="list-style-type: none"> <li>▶ Relationship between early identification of snoring and sleep disturbance with pregnancy complications: gestational diabetes, pre-eclampsia, fetal growth restriction, preterm delivery, autism</li> <li>▶ Impact of parental and child sleep on child development and physical health outcomes</li> <li>▶ Relationship between environmental and biological factors with parental and child sleep</li> </ul> | <ul style="list-style-type: none"> <li>▶ Depression Anxiety Stress Scale</li> <li>▶ Edinburgh Post-natal Depression Scale</li> <li>▶ European Quality of Life 5-Dimension</li> <li>▶ Infant sleep diary</li> <li>▶ Medical History</li> <li>▶ Medication and Lifestyle</li> <li>▶ Multidimensional Scale of Perceived Social Support</li> <li>▶ Physical Activity</li> <li>▶ DSM-5 Self-Rated Level 1 Cross-Cutting Symptom Measure - Adult</li> <li>▶ Social Readjustment Rating Scale</li> <li>▶ Pregnancy Complications</li> </ul> | <ul style="list-style-type: none"> <li>▶ NICU body measures in preterm infants</li> <li>▶ Peapod</li> </ul> | <ul style="list-style-type: none"> <li>▶ Pregnancy and Pregnancy Complications</li> </ul>                                                                                                                                                               |
| Social Determinants of Health Outcomes | <ul style="list-style-type: none"> <li>▶ Impact of social disadvantage on maternal, paternal health in Qld</li> <li>▶ Does parental social determinants of health (housing, education, employment) impact on pregnancy and birth outcomes?</li> <li>▶ Social networks and their impact on child development</li> <li>▶ Social disadvantage and its impact on child nutrition, cognitive development and</li> </ul>                                      | <ul style="list-style-type: none"> <li>▶ Childcare</li> <li>▶ Demographics</li> <li>▶ Depression Anxiety Stress Scale</li> <li>▶ Edinburgh Post-natal Depression Scale</li> <li>▶ Education History</li> <li>▶ Employment History</li> <li>▶ European Quality of Life 5-Dimension</li> <li>▶ Family history</li> <li>▶ Multidimensional Scale of Perceived Social Support</li> <li>▶ Physical Activity</li> </ul>                                                                                                                     | none                                                                                                        | <ul style="list-style-type: none"> <li>▶ Education</li> <li>▶ Epidemiology and Health Economics</li> <li>▶ Genomics</li> <li>▶ Mental Health and Cognitive Development</li> <li>▶ Nutrition</li> <li>▶ Pregnancy and Pregnancy complications</li> </ul> |

- 
- 1  
2  
3  
4 subsequent child educational  
5 outcomes  
6 ► What are the characteristics of  
7 individuals who are resilient in  
8 the face of early life adversity?  
9 ► How does developmental  
10 trauma and early adversity  
11 among individuals affect long-  
12 term trajectories
- DSM-5 Self-Rated Level 1  
Cross-Cutting Symptom  
Measure - Adult  
► PBS/MBS Data Linkage\*  
► Residential housing  
questionnaire  
► Social Readjustment Rating  
Scale
-

STROBE Statement—Checklist of items that should be included in reports of *cohort studies*

|                           | Item No | Recommendation                                                                                                                                                                                                                                                                                                         | Page No |
|---------------------------|---------|------------------------------------------------------------------------------------------------------------------------------------------------------------------------------------------------------------------------------------------------------------------------------------------------------------------------|---------|
| <b>Title and abstract</b> | 1       | (a) Indicate the study's design with a commonly used term in the title or the abstract<br>(b) Provide in the abstract an informative and balanced summary of what was done and what was found                                                                                                                          | 1<br>3  |
| <b>Introduction</b>       |         |                                                                                                                                                                                                                                                                                                                        |         |
| Background/rationale      | 2       | Explain the scientific background and rationale for the investigation being reported                                                                                                                                                                                                                                   | 5       |
| Objectives                | 3       | State specific objectives, including any prespecified hypotheses                                                                                                                                                                                                                                                       | 7       |
| <b>Methods</b>            |         |                                                                                                                                                                                                                                                                                                                        |         |
| Study design              | 4       | Present key elements of study design early in the paper                                                                                                                                                                                                                                                                | 8       |
| Setting                   | 5       | Describe the setting, locations, and relevant dates, including periods of recruitment, exposure, follow-up, and data collection                                                                                                                                                                                        | 8-9     |
| Participants              | 6       | (a) Give the eligibility criteria, and the sources and methods of selection of participants. Describe methods of follow-up<br>(b) For matched studies, give matching criteria and number of exposed and unexposed                                                                                                      | 8-9     |
| Variables                 | 7       | Clearly define all outcomes, exposures, predictors, potential confounders, and effect modifiers. Give diagnostic criteria, if applicable                                                                                                                                                                               | 20-25   |
| Data sources/measurement  | 8*      | For each variable of interest, give sources of data and details of methods of assessment (measurement). Describe comparability of assessment methods if there is more than one group                                                                                                                                   | 20-25   |
| Bias                      | 9       | Describe any efforts to address potential sources of bias                                                                                                                                                                                                                                                              | 11      |
| Study size                | 10      | Explain how the study size was arrived at                                                                                                                                                                                                                                                                              | 10      |
| Quantitative variables    | 11      | Explain how quantitative variables were handled in the analyses. If applicable, describe which groupings were chosen and why                                                                                                                                                                                           | 20-25   |
| Statistical methods       | 12      | (a) Describe all statistical methods, including those used to control for confounding<br>(b) Describe any methods used to examine subgroups and interactions<br>(c) Explain how missing data were addressed<br>(d) If applicable, explain how loss to follow-up was addressed<br>(e) Describe any sensitivity analyses | 11      |
| <b>Results</b>            |         |                                                                                                                                                                                                                                                                                                                        |         |
| Participants              | 13*     | (a) Report numbers of individuals at each stage of study—eg numbers potentially eligible, examined for eligibility, confirmed eligible, included in the study, completing follow-up, and analysed<br>(b) Give reasons for non-participation at each stage<br>(c) Consider use of a flow diagram                        | n/a     |
| Descriptive data          | 14*     | (a) Give characteristics of study participants (eg demographic, clinical, social) and information on exposures and potential confounders<br>(b) Indicate number of participants with missing data for each variable of interest<br>(c) Summarise follow-up time (eg, average and total amount)                         | n/a     |
| Outcome data              | 15*     | Report numbers of outcome events or summary measures over time                                                                                                                                                                                                                                                         | n/a     |

|    |                          |    |                                                                                                                                                                                                              |     |
|----|--------------------------|----|--------------------------------------------------------------------------------------------------------------------------------------------------------------------------------------------------------------|-----|
| 1  | Main results             | 16 | (a) Give unadjusted estimates and, if applicable, confounder-adjusted estimates and their precision (eg, 95% confidence interval). Make clear which confounders were adjusted for and why they were included | n/a |
| 2  |                          |    | (b) Report category boundaries when continuous variables were categorized                                                                                                                                    |     |
| 3  |                          |    | (c) If relevant, consider translating estimates of relative risk into absolute risk for a meaningful time period                                                                                             |     |
| 4  | Other analyses           | 17 | Report other analyses done—eg analyses of subgroups and interactions, and sensitivity analyses                                                                                                               | n/a |
| 5  | <b>Discussion</b>        |    |                                                                                                                                                                                                              |     |
| 6  | Key results              | 18 | Summarise key results with reference to study objectives                                                                                                                                                     | 14  |
| 7  | Limitations              | 19 | Discuss limitations of the study, taking into account sources of potential bias or imprecision. Discuss both direction and magnitude of any potential bias                                                   | 15  |
| 8  | Interpretation           | 20 | Give a cautious overall interpretation of results considering objectives, limitations, multiplicity of analyses, results from similar studies, and other relevant evidence                                   | 14  |
| 9  | Generalisability         | 21 | Discuss the generalisability (external validity) of the study results                                                                                                                                        | 14  |
| 10 | <b>Other information</b> |    |                                                                                                                                                                                                              |     |
| 11 | Funding                  | 22 | Give the source of funding and the role of the funders for the present study and, if applicable, for the original study on which the present article is based                                                | 29  |

\*Give information separately for exposed and unexposed groups.

**Note:** An Explanation and Elaboration article discusses each checklist item and gives methodological background and published examples of transparent reporting. The STROBE checklist is best used in conjunction with this article (freely available on the Web sites of PLoS Medicine at <http://www.plosmedicine.org/>, Annals of Internal Medicine at <http://www.annals.org/>, and Epidemiology at <http://www.epidem.com/>). Information on the STROBE Initiative is available at <http://www.strobe-statement.org>.
