# Supplementary material for: Queensland Family Cohort: a study protocol
Source: PubMed Central journal article supplement — BMJ Open. 2021 Jun 24;11(6):e044463. doi: 10.1136/bmjopen-2020-044463 (PMC8231060; doi:10.1136/bmjopen-2020-044463), 2021-06-24
Supplement: bmjopen-2020-044463.reviewer_comments.pdf [file bmjopen-2020-044463.reviewer_comments.pdf]

## PEER REVIEW HISTORY

BMJ Open publishes all reviews undertaken for accepted manuscripts. Reviewers are asked to complete a checklist review form (<http://bmjopen.bmj.com/site/about/resources/checklist.pdf>) and are provided with free text boxes to elaborate on their assessment. These free text comments are reproduced below.

### ARTICLE DETAILS

|                            |                                                                                                                                                                                                                                                                                                               |
|----------------------------|---------------------------------------------------------------------------------------------------------------------------------------------------------------------------------------------------------------------------------------------------------------------------------------------------------------|
| <b>TITLE (PROVISIONAL)</b> | The Queensland Family Cohort: Study Protocol                                                                                                                                                                                                                                                                  |
| <b>AUTHORS</b>             | Borg, Danielle; Rae, Kym; Fiveash, Corrine; Schagen, Johanna; James-McAlpine, Janelle; Friedlander, Frances; Thurston, Claire; Oliveri, Maria; Harmey, Theresa; Cavanagh, Erika; Edwards, Christopher; Fontanarosa, Davide; Perkins, Tony; de Zubicaray, Greig; Moritz, Karen; Kumar, Sailesh; Clifton, Vicki |

### VERSION 1 – REVIEW

|                        |                                                                |
|------------------------|----------------------------------------------------------------|
| <b>REVIEWER</b>        | Mohan, Diwakar<br>John Hopkins Bloomberg, International Health |
| <b>REVIEW RETURNED</b> | 21-Nov-2020                                                    |

|                         |                                                                                                                                                                                                                                                                                                                                                                                                                                                                                                                                                                                                                                                                                                                                                                                                                                                                                                                                                                                                                                                                                                                                                                                                                                                                                                                             |
|-------------------------|-----------------------------------------------------------------------------------------------------------------------------------------------------------------------------------------------------------------------------------------------------------------------------------------------------------------------------------------------------------------------------------------------------------------------------------------------------------------------------------------------------------------------------------------------------------------------------------------------------------------------------------------------------------------------------------------------------------------------------------------------------------------------------------------------------------------------------------------------------------------------------------------------------------------------------------------------------------------------------------------------------------------------------------------------------------------------------------------------------------------------------------------------------------------------------------------------------------------------------------------------------------------------------------------------------------------------------|
| <b>GENERAL COMMENTS</b> | <p>Thank you for the opportunity to review your manuscript. The study appears to be very well thought out and co-created with a wide variety of stakeholders including the consumers / participants.</p> <p>There are some minor spelling and grammatical errors and would be good if these can be rectified.</p> <p>Minor suggestions</p> <ul style="list-style-type: none"><li>- The sources of bias due to consent process have been outlined in great detail. If circumstances permit, it might be a useful to collection data on demographics of those who refuse to participate and their reasons for refusal.</li><li>- in the section on unexpected findings, there is no mention or discussion of what the procedure protocol is to address any discoveries that may be potentially linked to criminal activities or harm to others. This could include sexual or physical abuse of the participants or others connected to them. ‘</li><li>- Figure on page 36 does not seem to have a label and seems to go beyond the margins. Feel free to include only if the figure is important.</li><li>- Please include table information at the top of the table rather than the bottom.</li></ul> <p>- The reviewer provided a marked copy with additional comments. Please contact the publisher for full details.</p> |
|-------------------------|-----------------------------------------------------------------------------------------------------------------------------------------------------------------------------------------------------------------------------------------------------------------------------------------------------------------------------------------------------------------------------------------------------------------------------------------------------------------------------------------------------------------------------------------------------------------------------------------------------------------------------------------------------------------------------------------------------------------------------------------------------------------------------------------------------------------------------------------------------------------------------------------------------------------------------------------------------------------------------------------------------------------------------------------------------------------------------------------------------------------------------------------------------------------------------------------------------------------------------------------------------------------------------------------------------------------------------|

### VERSION 1 – AUTHOR RESPONSE

Reviewer 1 comment: Thank you for the opportunity to review your manuscript. The study appears to be very well thought out and co-created with a wide variety of stakeholders including the consumers / participants.

There are some minor spelling and grammatical errors and would be good if these can be rectified.  
 Authors Response: Thank you for this comment. We have scanned the document, corrected errors, removed superfluous words, and changed tense as detailed in the table and marked copy of the main document.

Reviewer 1 comment: The sources of bias due to consent process have been outlined in great detail. If circumstances permit, it might be a useful to collection data on demographics of those who refuse to participate and their reasons for refusal.

Authors Response: Thank you for this comment. While we agree that obtaining demographic information and understanding why a family refuses to participate in a longitudinal study over pregnancy would be of great benefit, unfortunately, our ethics does not allow for questioning or follow up of individuals who decline participation in the study. This has now been clearly defined to ensure the correct interpretation for the reader in the main document.

Reviewer 1 comment: in the section on unexpected findings, there is no mention or discussion of what the procedure protocol is to address any discoveries that may be potentially linked to criminal activities or harm to others. This could include sexual or physical abuse of the participants or others connected to them.

Authors Response: Thank you for this comment. Participants are advised when consenting that if disclosures are required by law (criminal) or if the Research Midwife identifies that participant healthcare requires urgent attention (for e.g. medical, indications of partner, child abuse, bereavement) they have a duty of care to disclose or escalate the matter as required. This has now been detailed in the main document.

Reviewer 1 comment: Figure on page 36 does not seem to have a label and seems to go beyond the margins. Feel free to include only if the figure is important.

Authors Response: Thank you for this comment. Figure 1 on Page 37 was increased in size to allow for the easy interpretation for the reader. We have uploaded a jpeg file to the correct resolution and size as requested.

Reviewer 1 comment: Please include table information at the top of the table rather than the bottom.

Authors Response: Thank you for this comment. We have now corrected this formatting to ensure the Table information is at the top of the table rather than the bottom.

Overall Change Summary (document changes in red)

| Reviewer | Comment                  | Text Changes                                                    | Location in Document |
|----------|--------------------------|-----------------------------------------------------------------|----------------------|
| 1        | Figure Formatting        | Relabelled Figure 1 to Figure 1 Legend                          | Page 17, 18          |
| 2        | Grammar and Text Changes | Changed was to were                                             | Page 6               |
|          |                          | Added and                                                       | Page 6               |
|          |                          | Removed for example                                             | Page 7               |
|          |                          | Corrected approximately                                         | Page 8               |
|          |                          | Shortened sentence removed which and added This                 | Page 8               |
|          |                          | Changed has been to will be                                     | Page 9               |
|          |                          | Corrected 2020 to 2021                                          | Page 9               |
|          |                          | Removed undertook their antenatal care to are booked to deliver | Page 9               |
|          |                          | Changed were to will be                                         | Page 9               |
|          |                          | Added pilot                                                     | Page 9               |

|   |                     |                                                                                                                                                                                                                                                                                                                                                                                                                                                                                                                                                                  |         |
|---|---------------------|------------------------------------------------------------------------------------------------------------------------------------------------------------------------------------------------------------------------------------------------------------------------------------------------------------------------------------------------------------------------------------------------------------------------------------------------------------------------------------------------------------------------------------------------------------------|---------|
|   |                     | Changed are to will be                                                                                                                                                                                                                                                                                                                                                                                                                                                                                                                                           | Page 9  |
|   |                     | Removed During and recent                                                                                                                                                                                                                                                                                                                                                                                                                                                                                                                                        | Page 10 |
|   |                     | Changed was to will be                                                                                                                                                                                                                                                                                                                                                                                                                                                                                                                                           | Page 10 |
|   |                     | Changed were to will be                                                                                                                                                                                                                                                                                                                                                                                                                                                                                                                                          | Page 10 |
|   |                     | Added for pregnant participant only                                                                                                                                                                                                                                                                                                                                                                                                                                                                                                                              | Page 10 |
|   |                     | Added from mother                                                                                                                                                                                                                                                                                                                                                                                                                                                                                                                                                | Page 10 |
|   |                     | Changed was collected to will be                                                                                                                                                                                                                                                                                                                                                                                                                                                                                                                                 | Page 11 |
|   |                     | Changed were collected to will be                                                                                                                                                                                                                                                                                                                                                                                                                                                                                                                                | Page 11 |
|   |                     | Added three                                                                                                                                                                                                                                                                                                                                                                                                                                                                                                                                                      | Page 11 |
|   |                     | Added the                                                                                                                                                                                                                                                                                                                                                                                                                                                                                                                                                        | Page 12 |
|   |                     | Removed to                                                                                                                                                                                                                                                                                                                                                                                                                                                                                                                                                       | Page 12 |
|   |                     | Removed have                                                                                                                                                                                                                                                                                                                                                                                                                                                                                                                                                     | Page 12 |
|   |                     | Added are                                                                                                                                                                                                                                                                                                                                                                                                                                                                                                                                                        | Page 12 |
|   |                     | Added pilot                                                                                                                                                                                                                                                                                                                                                                                                                                                                                                                                                      | Page 12 |
|   |                     | Added multisite                                                                                                                                                                                                                                                                                                                                                                                                                                                                                                                                                  | Page 12 |
|   |                     | Removed are likely to with may                                                                                                                                                                                                                                                                                                                                                                                                                                                                                                                                   | Page 13 |
|   |                     | Added pilot                                                                                                                                                                                                                                                                                                                                                                                                                                                                                                                                                      | Page 13 |
|   |                     | Changed were to will be                                                                                                                                                                                                                                                                                                                                                                                                                                                                                                                                          | Page 13 |
|   |                     | Changed have been to be                                                                                                                                                                                                                                                                                                                                                                                                                                                                                                                                          | Page 13 |
|   |                     | Changed were to are                                                                                                                                                                                                                                                                                                                                                                                                                                                                                                                                              | Page 13 |
|   |                     | Added may                                                                                                                                                                                                                                                                                                                                                                                                                                                                                                                                                        | Page 13 |
|   |                     | Changed failed to fail                                                                                                                                                                                                                                                                                                                                                                                                                                                                                                                                           | Page 13 |
|   |                     | Changed this committee meet to this committee will meet                                                                                                                                                                                                                                                                                                                                                                                                                                                                                                          | Page 13 |
|   |                     | Added will                                                                                                                                                                                                                                                                                                                                                                                                                                                                                                                                                       | Page 14 |
|   |                     | Added their application along with their planned                                                                                                                                                                                                                                                                                                                                                                                                                                                                                                                 | Page 14 |
|   |                     | Corrected 2020 to 2021                                                                                                                                                                                                                                                                                                                                                                                                                                                                                                                                           | Page 14 |
|   |                     | Corrected QLD to QFC                                                                                                                                                                                                                                                                                                                                                                                                                                                                                                                                             | Page 14 |
|   |                     | Changed are to will be                                                                                                                                                                                                                                                                                                                                                                                                                                                                                                                                           | Page 14 |
|   |                     | Changed are to to will                                                                                                                                                                                                                                                                                                                                                                                                                                                                                                                                           | Page 14 |
|   |                     | Corrected gender diverse to LGBTQIA+ members                                                                                                                                                                                                                                                                                                                                                                                                                                                                                                                     | Page 15 |
|   |                     | Corrected rate from 6 to 10.6%                                                                                                                                                                                                                                                                                                                                                                                                                                                                                                                                   | Page 15 |
|   |                     | Added Qiagen                                                                                                                                                                                                                                                                                                                                                                                                                                                                                                                                                     | Page 27 |
|   |                     | Corrected REDCap                                                                                                                                                                                                                                                                                                                                                                                                                                                                                                                                                 | Page 28 |
| 2 | Source of Bias      | Although all potential pilot participants will be approached and followed-up using phone calls or SMS reminders, selection bias may be introduced for potential participants who are linguistically diverse and may fail to respond to follow-up attempts [30, 31]. Moreover, while we acknowledge that understanding the reason and demographics of families who do not consent to participant in this study would be of benefit, under the ethics approval for the pilot study, we are unable to follow-up or question a participant once they refuse contact. | Page 13 |
| 2 | Unexpected Findings | Participants are advised during the consenting process that if disclosures are required by law, or there are health concerns during routine appointments that require urgent care, that it is the duty of care of                                                                                                                                                                                                                                                                                                                                                | Page 14 |

|   |                   |                                                                                            |                               |
|---|-------------------|--------------------------------------------------------------------------------------------|-------------------------------|
|   |                   | the research midwives' to disclose or escalate the issue as appropriate.                   |                               |
| 2 | Figure Formatting | Reduced the size of Figure 1                                                               | Page 35                       |
| 2 | Table information | Moved table information to the top of the table<br>Table 2, Table 3, Supplementary table 1 | Page 20<br>Page 24<br>Page 36 |

We thank BMJ Open for their time, assistance, and support. We look forward to your response.
